# Supplementary material for: Finerenone cardiovascular and kidney outcomes by age and sex: FIDELITY post hoc analysis of two phase 3, multicentre, double-blind trials
Source: PubMed Central journal article supplement — BMJ Open. 2024 Mar 19;14(3):e076444. doi: 10.1136/bmjopen-2023-076444 (PMC10952937; doi:10.1136/bmjopen-2023-076444), 2024-03-19
Supplement: bmjopen-2023-076444.draft_revisions.pdf [file bmjopen-2023-076444.draft_revisions.pdf]

# BMJ Open

BMJ Open is committed to open peer review. As part of this commitment we make the peer review history of every article we publish publicly available.

When an article is published we post the peer reviewers' comments and the authors' responses online. We also post the versions of the paper that were used during peer review. These are the versions that the peer review comments apply to.

The versions of the paper that follow are the versions that were submitted during the peer review process. They are not the versions of record or the final published versions. They should not be cited or distributed as the published version of this manuscript.

BMJ Open is an open access journal and the full, final, typeset and author-corrected version of record of the manuscript is available on our site with no access controls, subscription charges or pay-per-view fees (<http://bmjopen.bmj.com>).

If you have any questions on BMJ Open's open peer review process please email [info.bmjopen@bmj.com](mailto:info.bmjopen@bmj.com)

# BMJ Open

## Cardiorenal Outcomes by Age and Sex in Patients Treated With Finerenone: FIDELITY Post Hoc Analysis

|                               |                                                                                                                                                                                                                                                                                                                                                                                                                                                                                                                                                                                                                                                                                                                                                                                                                                                                                                                                                                                                                                                                                           |
|-------------------------------|-------------------------------------------------------------------------------------------------------------------------------------------------------------------------------------------------------------------------------------------------------------------------------------------------------------------------------------------------------------------------------------------------------------------------------------------------------------------------------------------------------------------------------------------------------------------------------------------------------------------------------------------------------------------------------------------------------------------------------------------------------------------------------------------------------------------------------------------------------------------------------------------------------------------------------------------------------------------------------------------------------------------------------------------------------------------------------------------|
| Journal:                      | <i>BMJ Open</i>                                                                                                                                                                                                                                                                                                                                                                                                                                                                                                                                                                                                                                                                                                                                                                                                                                                                                                                                                                                                                                                                           |
| Manuscript ID                 | bmjopen-2023-076444                                                                                                                                                                                                                                                                                                                                                                                                                                                                                                                                                                                                                                                                                                                                                                                                                                                                                                                                                                                                                                                                       |
| Article Type:                 | Original research                                                                                                                                                                                                                                                                                                                                                                                                                                                                                                                                                                                                                                                                                                                                                                                                                                                                                                                                                                                                                                                                         |
| Date Submitted by the Author: | 07-Jun-2023                                                                                                                                                                                                                                                                                                                                                                                                                                                                                                                                                                                                                                                                                                                                                                                                                                                                                                                                                                                                                                                                               |
| Complete List of Authors:     | Bansal, Shweta ; The University of Texas Health Science Center at San Antonio Department of Medicine<br>Canziani, M. E. F.; Univ Fed Sao Paulo<br>Birne, Rita; Centro Hospitalar Lisboa Ocidental, Department of Nephrology; University of Lisbon, Nova Medical School<br>Anker, Stefan; Charité Universitätsmedizin, Department of Cardiology (CVK) of German Heart Center Charité; Institute of Health Center for Regenerative Therapies (BCRT)<br>Bakris, George; University of Chicago, Hypertension Center<br>Filippatos, Gerasimos; National and Kapodistrian University of Athens<br>Rossing, Peter; Steno Diabetes Center AS; University of Copenhagen, Department of Clinical Medicine<br>Ruilope, Luis M ; Institute of Research imas12, Cardiorenal Translational Laboratory and Hypertension Unit; Hospital Universitario 12 de Octubre, CIBER-CV<br>Farjat, Alfredo; Bayer plc<br>Kolkhof, Peter; Cardiovascular Precision Medicines Bayer AG<br>Lage, Andrea; Bayer SA<br>Brinker, Meike; Cardiology and Nephrology Clinical Development<br>Pitt, B; University of Michigan |
| Keywords:                     | Risk Factors, Diabetic nephropathy & vascular disease < DIABETES & ENDOCRINOLOGY, DIABETES & ENDOCRINOLOGY                                                                                                                                                                                                                                                                                                                                                                                                                                                                                                                                                                                                                                                                                                                                                                                                                                                                                                                                                                                |
|                               |                                                                                                                                                                                                                                                                                                                                                                                                                                                                                                                                                                                                                                                                                                                                                                                                                                                                                                                                                                                                                                                                                           |

SCHOLARONE™  
Manuscripts

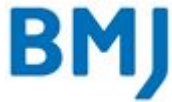

I, the Submitting Author has the right to grant and does grant on behalf of all authors of the Work (as defined in the below author licence), an exclusive licence and/or a non-exclusive licence for contributions from authors who are: i) UK Crown employees; ii) where BMJ has agreed a CC-BY licence shall apply, and/or iii) in accordance with the terms applicable for US Federal Government officers or employees acting as part of their official duties; on a worldwide, perpetual, irrevocable, royalty-free basis to BMJ Publishing Group Ltd ("BMJ") its licensees and where the relevant Journal is co-owned by BMJ to the co-owners of the Journal, to publish the Work in this journal and any other BMJ products and to exploit all rights, as set out in our [licence](#).

The Submitting Author accepts and understands that any supply made under these terms is made by BMJ to the Submitting Author unless you are acting as an employee on behalf of your employer or a postgraduate student of an affiliated institution which is paying any applicable article publishing charge ("APC") for Open Access articles. Where the Submitting Author wishes to make the Work available on an Open Access basis (and intends to pay the relevant APC), the terms of reuse of such Open Access shall be governed by a Creative Commons licence – details of these licences and which [Creative Commons](#) licence will apply to this Work are set out in our licence referred to above.

Other than as permitted in any relevant BMJ Author's Self Archiving Policies, I confirm this Work has not been accepted for publication elsewhere, is not being considered for publication elsewhere and does not duplicate material already published. I confirm all authors consent to publication of this Work and authorise the granting of this licence.

# Cardiorenal Outcomes by Age and Sex in Patients Treated With Finerenone: FIDELITY Post Hoc Analysis

## Author(s)

Shweta Bansal, MD,<sup>1</sup> Maria E.F. Canziani, MD,<sup>2</sup> Rita Birne, MD,<sup>3,4</sup> Stefan D. Anker, MD, PhD,<sup>5</sup> George L. Bakris, MD,<sup>6</sup> Gerasimos Filippatos, MD,<sup>7</sup> Peter Rossing, MD, DMSc,<sup>8,9</sup> Luis M. Ruilope, MD,<sup>10-12</sup> Alfredo E. Farjat, PhD,<sup>13</sup> Peter Kolkhof, PhD,<sup>14</sup> Andrea Lage, MD,<sup>15</sup> Meike Brinker, MD,<sup>16</sup> Bertram Pitt, MD,<sup>17</sup> on behalf of the FIDELIO-DKD and FIGARO-DKD investigators

## Institution(s)

<sup>1</sup>Division of Nephrology, Department of Medicine, University of Texas Health San Antonio, San Antonio, Texas, USA

<sup>2</sup>Nephrology Division, Federal University of São Paulo, São Paulo, Brazil

<sup>3</sup>Department of Nephrology, Centro Hospitalar Lisboa Ocidental, Lisbon, Portugal

<sup>4</sup>Nova Medical School, University of Lisbon, Lisbon, Portugal

<sup>5</sup>Department of Cardiology (CVK) of German Heart Center Charité; Institute of Health Center for Regenerative Therapies (BCRT), German Centre for Cardiovascular Research (DZHK) partner Site Berlin, Charité Universitätsmedizin, Berlin, Germany

<sup>6</sup>Department of Medicine, University of Chicago Medicine, Chicago, Illinois, USA

<sup>7</sup>National and Kapodistrian University of Athens, School of Medicine, Department of Cardiology, Attikon University Hospital, Athens, Greece

<sup>8</sup>Steno Diabetes Center Copenhagen, Gentofte, Denmark

<sup>9</sup>Department of Clinical Medicine, University of Copenhagen, Copenhagen, Denmark

<sup>10</sup>Cardiorenal Translational Laboratory and Hypertension Unit, Institute of Research imas12, Madrid, Spain

<sup>11</sup>CIBER-CV, Hospital Universitario 12 de Octubre, Madrid, Spain

1  
2  
3 <sup>12</sup>Faculty of Sport Sciences, European University of Madrid, Madrid, Spain  
4

5 <sup>13</sup>Research and Development, Clinical Data Sciences and Analytics, Bayer PLC, Reading,  
6  
7 UK  
8

9 <sup>14</sup>Research and Early Development, Cardiovascular Precision Medicines, Bayer AG,  
10  
11 Wuppertal, Germany  
12

13 <sup>15</sup>Cardiology and Nephrology Clinical Development, Bayer SA, São Paulo, Brazil  
14

15 <sup>16</sup>Cardiology and Nephrology Clinical Development, Bayer AG, Wuppertal, Germany  
16

17 <sup>17</sup>Department of Medicine, University of Michigan School of Medicine, Ann Arbor, Michigan,  
18  
19 USA  
20  
21  
22

23  
24 **Contact information for corresponding author:**  
25

26 Name: Shweta Bansal, MD, FASN  
27

28 Address: Department of Medicine, Division of Nephrology, Joe R. & Teresa Lozano Long  
29

30 School of Medicine, UT Health, San Antonio, TX, USA  
31

32 7703 Floyd Curl Drive, MSC 7882  
33

34 San Antonio, TX-78229, USA  
35

36 Phone no: 210-422-0438  
37

38 Fax no: 210-567-4712  
39

40 Email: bansals3@uthscsa.edu  
41  
42  
43  
44

45 **Journal:** BMJ Open  
46

47 **Running head:** Finerenone: Cardiorenal Outcomes by Age and Sex  
48

49 **Key words:** chronic kidney disease, type 2 diabetes, cardiorenal, finerenone, risk factors  
50  
51  
52

53 **Word count:** 2797 of 4000 allowed by the journal (*excluding title, abstract, tables, figures and*  
54  
55 *figure legends, acknowledgments, disclosures, references, and online-only material*)  
56

57 **No. of figures and tables:** 5 of 5 tables/figures allowed by the journal (combined)  
58

59 **No. of references:** 42  
60

## Abstract

**Objectives:** To evaluate the effects of finerenone, a selective, nonsteroidal mineralocorticoid receptor antagonist, on cardiorenal outcomes by age and/or sex.

**Design:** Post hoc analysis of the FIDELITY study (prespecified pooled analysis of FIDELIO-DKD and FIGARO-DKD), with a median follow-up of 3 years.

**Setting:** FIDELITY was a prespecified analysis of two phase 3, multicenter, double-blind trials.

**Participants:** Adults with type 2 diabetes and chronic kidney disease receiving maximum tolerated renin–angiotensin system inhibitor; 13 171 patients randomized and 13 026 patients included in the analyses.

**Interventions:** Randomized 1:1 to finerenone or placebo.

**Primary and secondary outcome measures:** Primary outcomes were a cardiovascular composite outcome (cardiovascular death, nonfatal myocardial infarction, nonfatal stroke, or hospitalization for heart failure) and a kidney composite outcome (kidney failure, sustained  $\geq 57\%$  estimated glomerular filtration rate decline, or renal death).

**Results:** The mean age of 13 026 participants was 64.8 years; 45.2%, 40.1%, and 14.7% were aged  $<65$ , 65–74, and  $\geq 75$  years, respectively; 69.8% were male. Cardiovascular benefits of finerenone versus placebo were consistent across age ( $P_{\text{interaction}}=.42$ ) and sex categories ( $P_{\text{interaction}}=.99$ ); effects of finerenone to reduce hospitalization for heart failure were not modified by age ( $P_{\text{interaction}}=.70$ ) but were more pronounced in males ( $P_{\text{interaction}}=.02$ ). Kidney events were lower with finerenone versus placebo in patients aged  $<65$  and 65–74 but not  $\geq 75$ ; no heterogeneity in treatment effect was observed ( $P_{\text{interaction}}=.51$ ). In sex subgroups, finerenone consistently reduced kidney events ( $P_{\text{interaction}}=.85$ ). Finerenone reduced albuminuria and estimated glomerular filtration rate decline regardless of age and sex. Hyperkalemia increased with finerenone, but rates of subsequent discontinuation were  $<3\%$  across subgroups. Gynecomastia in males was uncommon across age subgroups and identical between treatment groups.

1  
2  
3 **Conclusions:** Finerenone improved cardiorenal outcomes with no new safety concerns  
4  
5 across ages and sexes.  
6

7 **Registration:** FIDELIO-DKD (NCT02540993); FIGARO-DKD (NCT02545049)  
8  
9

10  
11 **Abstract word count:** 290 of 300 allowed by the journal (no abbreviations)  
12  
13

### 14 **Strengths and limitations of this study**

- 15 • An advantage of this study was the use of combined individual-level data from the  
16 FIDELIO-DKD and FIGARO-DKD phase 3 clinical trials, resulting in a large number of  
17 patients included in the full analysis set
- 18 • This study did not use predefined age categories, as it was a post hoc analysis, which  
19 may have resulted in some of the tests performed being underpowered
- 20 • Limitations present in FIDELITY are present in this analysis, such as the small proportion  
21 of Black patients and exclusion of patients with nonalbuminuric CKD  
22  
23  
24  
25  
26  
27  
28  
29  
30  
31  
32  
33  
34  
35  
36  
37  
38  
39  
40  
41  
42  
43  
44  
45  
46  
47  
48  
49  
50  
51  
52  
53  
54  
55  
56  
57  
58  
59  
60

## Introduction

In patients with diabetes, the risk of cardiovascular (CV) disease and chronic kidney disease (CKD) increases with age.<sup>1</sup> Likewise, vascular complications are affected by sex and are increased in females more than males in patients with diabetes.<sup>2</sup>

Among individuals aged 50 to 75 years without baseline diabetes, CKD, or CV disease, males have a steeper decline in glomerular filtration rate (GFR) than females.<sup>3</sup> However, reported effects of sex on risk of incidental and progressive CKD in patients with type 2 diabetes (T2D) have been inconsistent.<sup>4-6</sup> In trials including patients with CKD, female representation varies (25-40%),<sup>7-11</sup> whereas in real-world studies, females make up over half of patients.<sup>12,13</sup>

Overactivation of the mineralocorticoid receptor (MR) is associated with CV and kidney diseases.<sup>14,15</sup> In epithelial cells, the 11 $\beta$ -hydroxysteroid dehydrogenase type 2 (11 $\beta$ -HSD2) enzyme prevents inappropriate MR activation by cortisol.<sup>16-18</sup> The activity of 11 $\beta$ -HSD2 decreases with age, resulting in MR overactivation in the elderly despite low circulating aldosterone levels.<sup>16-18</sup> Sex also influences 11 $\beta$ -HSD2 activity, particularly in patients with hypertension, where 11 $\beta$ -HSD2 activity is reduced in males versus females.<sup>16</sup> The MR is also expressed in nonepithelial cells, including endothelial cells, vascular smooth muscle cells, adipocytes, and immune cells.<sup>17</sup> In many of these, the MR may be activated by cortisol because of a lack of protection by 11 $\beta$ -HSD2.<sup>19,20</sup>

Despite management with recommended treatments for CKD in T2D, patients experience CKD progression or kidney failure and are at high risk of CV events.<sup>10,21-23</sup> Finerenone, a selective, nonsteroidal MR antagonist (MRA), reduced the risk of CKD progression and CV outcomes compared with placebo in patients with CKD and T2D in FIDELITY (The Finerenone in chronic kidney disease and type 2 diabetes: Combined FIDELIO-DKD and



1  
2  
3 FIGARO-DKD Trial programme analysis), a prespecified pooled analysis of the  
4  
5 FIDELIO-DKD (Finerenone in reducing kidney failure and disease progression in Diabetic  
6  
7 Kidney Disease; NCT02540993) and FIGARO-DKD (Finerenone in reducing cardiovascular  
8  
9 mortality and morbidity in Diabetic Kidney Disease; NCT02545049) phase 3 trials.<sup>21</sup>  
10  
11 However, the influence of age and sex on outcomes with finerenone is unknown. This post  
12  
13 hoc analysis evaluated whether the cardiorenal benefits and safety profile of finerenone  
14  
15 observed in FIDELITY are consistent in patients with CKD and T2D across ages and in both  
16  
17 sexes.  
18  
19

## 20 21 **Methods**

### 22 23 **Study Design and Patients**

24  
25 FIDELITY combined individual patient-level data from the FIDELIO-DKD and FIGARO-DKD  
26  
27 phase 3 clinical trials. The study design, procedures, and outcomes for the trials have been  
28  
29 previously published.<sup>24-26</sup>  
30  
31  
32

33  
34  
35 Eligible patients were aged  $\geq 18$  years with CKD and T2D, receiving maximum tolerated  
36  
37 renin–angiotensin system inhibitor, and with serum potassium levels  $\leq 4.8$  mmol/L at  
38  
39 screening. Patients had either a urine albumin-to-creatinine ratio (UACR)  $\geq 30$  to  $< 300$  mg/g  
40  
41 and an estimated glomerular filtration rate (eGFR)  $\geq 25$  to  $\leq 90$  mL/min/1.73 m<sup>2</sup>, or UACR  
42  
43  $\geq 300$  to  $\leq 5000$  mg/g and eGFR  $\geq 25$  mL/min/1.73 m<sup>2</sup>. Patients with symptomatic heart failure  
44  
45 (HF) with reduced ejection fraction were excluded because this implies an indication for a  
46  
47 steroidal MRA.  
48  
49

50  
51  
52 Standard-of-care therapy with a renin–angiotensin system inhibitor was optimized during the  
53  
54 run-in period. Patients were randomly assigned (1:1) to receive finerenone at titrated doses  
55  
56 (10 or 20 mg) once-daily oral treatment or matching placebo.  
57  
58  
59  
60

## Key Outcomes

Efficacy outcomes included a CV composite outcome (CV death, nonfatal myocardial infarction, nonfatal stroke, or hospitalization for HF [HHF]), a kidney composite outcome (kidney failure, sustained  $\geq 57\%$  eGFR decline, or renal death), HHF, and change in UACR and eGFR over time.

Safety outcomes included incidence of investigator-reported adverse events (AEs), including those leading to treatment discontinuation, central laboratory assessment of serum potassium levels  $>5.5$  and  $>6.0$  mmol/L, and other safety events of interest, such as hypotension, hyperkalemia, and gynecomastia in males.

Outcomes were analyzed according to patient age at baseline ( $<65$ , 65 to 75,  $\geq 75$  years) and sex (females were categorized as either pre- or postmenopausal if they were aged  $<51.4$  or  $\geq 51.4$  years at baseline, respectively).

## Statistical Analysis

Statistical analyses were performed as described in FIDELITY.<sup>24</sup> The full analysis set comprised all randomized patients (except those with critical Good Clinical Practice violations, who were prospectively excluded). Safety analyses were performed in the safety analysis set (randomized patients without critical Good Clinical Practice violations who took  $>1$  dose of study drug). The analyses were prespecified exploratory evaluations of outcomes according to age and sex, with events reported from randomization up to the end-of-study visit. Stratified Cox proportional hazards models were used for the analysis of time-to-event clinical outcomes with stratification factors: geographic region, eGFR and albuminuria category at screening, history of CV disease, and study. The *P*-values for interaction between the treatment group (finerenone or placebo) and each baseline subgroup were based on stratified Cox proportional hazards models, accounting for the treatment effect, the subgroup effect, and their interaction.

1  
2  
3  
4  
5 Changes in UACR and eGFR over time were assessed using a linear mixed-model analysis  
6 accounting for repeated measurements over time. The least-squares mean ratio and  
7 absolute change from baseline were estimated from the models for changes in UACR and  
8 eGFR, respectively. The 2-slope, linear spline, mixed-model, repeated measure method<sup>27</sup>  
9 was used to estimate the rate of change in eGFR across time, specifically total (annualized  
10 rate of change in eGFR from baseline to permanent discontinuation or end of study) and  
11 chronic (from month 4 to permanent discontinuation or end of study) eGFR slopes. To  
12 account for possible nonlinear effects of age on clinical outcomes, age was modeled with  
13 cubic splines with 3 knots in Cox proportional hazards models, to produce plots of the HRs  
14 and 95% CI as functions of age and sex.  
15  
16  
17  
18  
19  
20  
21  
22  
23  
24  
25  
26

## 27 **Patients and public involvement**

28  
29 No patient or public involvement in the current study.  
30  
31  
32

## 33 **Results**

### 34 **Patients**

35  
36  
37 FIDELITY included 13 026 patients.<sup>24</sup> Median follow-up was 3 years (interquartile range 2.3  
38 to 3.8).<sup>24</sup> Mean age at baseline was 64.8 years (standard deviation 9.5), with 45.2%, 40.1%,  
39 and 14.7% of patients aged <65, 65 to 74, and ≥75 years at baseline, respectively. Most  
40 patients (69.8%;  $n=9088/13\ 026$ ) were male; 2.5% ( $n=323/13\ 026$ ) were premenopausal  
41 females, and 27.8% ( $n=3615/13\ 026$ ) were postmenopausal females. Patients were  
42 distributed evenly between treatment arms within age and sex subgroups (**eTable 1**).  
43  
44  
45  
46  
47  
48  
49  
50  
51  
52

### 53 **Baseline Characteristics**

54  
55 Baseline characteristics were similar across age subgroups except for some key differences  
56 (**Table 1**). The overall FIDELITY population was predominantly White (68.1%), the proportion  
57 of which increased with age. Mean eGFR and median UACR were higher in the <65 years  
58  
59  
60

1  
2  
3 group. History of CV disease was more common in the  $\geq 75$  years group; this trend was also  
4  
5 observed for atrial fibrillation/atrial flutter.

6  
7 Baseline characteristics in sex subgroups are shown in **Table 1**.

## 8 9 10 **Efficacy**

### 11 12 13 *CV composite outcome by age*

14  
15  
16 CV composite event rates increased with patient age in both treatment arms (**Figure 1A**).  
17  
18 However, CV composite event rates were lower with finerenone than placebo in all age  
19  
20 groups (**Figure 1A**). The effect of finerenone on reducing the risk of the CV composite  
21  
22 outcome was consistent across categorical age subgroups ( $P_{\text{interaction}}=.42$ ). There was no  
23  
24 evidence of treatment effect modification when age was modeled as a continuous variable  
25  
26 ( $P_{\text{interaction}}=.10$ ). The trend of HR as a function of age was modeled with cubic splines  
27  
28 (**eFigure 1A**).

29  
30  
31  
32  
33 HHF event rates were lower with finerenone than placebo in all age subgroups (**Figure 1A**).  
34  
35 The effect of finerenone on HHF risk reduction was consistent across age subgroups  
36  
37 ( $P_{\text{interaction}}=.70$ ).

### 38 39 40 *CV composite outcome by sex*

41  
42  
43 CV composite event rates were lower with finerenone than placebo for males,  
44  
45 premenopausal females, and postmenopausal females (**Figure 1B**). The effect of finerenone  
46  
47 on reducing the risk of the CV composite outcome was consistent across sex subgroups  
48  
49 ( $P_{\text{interaction}}=.10$ ). When age was modeled with cubic splines by sex, the effect of finerenone  
50  
51 was consistent with advancing age in males; however, a trend toward a stronger effect in  
52  
53 older versus younger females was noted (**eFigure 1B, 1C**). Age distribution by sex is  
54  
55 demonstrated in **eFigure 1D**.

1  
2  
3 The reduction of HHF with finerenone versus placebo was more pronounced in males than  
4 premenopausal/postmenopausal females (**Figure 1B**). These results persisted after  
5 adjustment for differences in baseline age, body mass index, systolic blood pressure,  
6 hemoglobin, eGFR, UACR, smoking history, and history of atrial fibrillation between sex  
7 subgroups ( $P_{\text{interaction}}=.02$ ).  
8  
9  
10  
11  
12

### 13 *Kidney composite outcome by age*

14  
15  
16  
17 Kidney composite event rates were lower with finerenone than placebo in the <65 years and  
18 the 65 to 74 years groups but were similar in the  $\geq 75$  years group (**Figure 2A**). The effect of  
19 finerenone on reducing the risk of the kidney composite outcome was consistent across age  
20 subgroups ( $P_{\text{interaction}}=.51$ ), with no evidence of treatment effect modification when age was  
21 modeled as a continuous variable ( $P_{\text{interaction}}=.77$ ). The trend of HR as function of age was  
22 modeled with cubic splines (**eFigure 2A**).  
23  
24  
25  
26  
27  
28  
29

### 30 *Kidney composite outcome by sex*

31  
32  
33 Kidney composite event rates were lower with finerenone than placebo in males but were  
34 similar in premenopausal and postmenopausal females (**Figure 2B**). The effect of finerenone  
35 on reducing the risk of the kidney composite outcome was consistent across sex subgroups  
36 ( $P_{\text{interaction}}=.85$ ). When age was modeled with cubic splines by sex subgroups, the effect of  
37 finerenone suggests trends similar to overall results in males and females across all age  
38 groups (**eFigure 2B, 2C**). Age distribution by sex is demonstrated in **eFigure 2D**.  
39  
40  
41  
42  
43  
44  
45

### 46 *Effect of finerenone on markers of kidney function and damage by age and sex*

47  
48  
49 Finerenone significantly attenuated the least-squares mean change in eGFR from month 4 to  
50 end of treatment (chronic eGFR slope) compared with placebo across all age and sex  
51 subgroups (**Figure 3, eFigure 3**). Finerenone reduced UACR over time compared with  
52 placebo regardless of age and sex (**eFigure 4**).  
53  
54  
55  
56  
57  
58  
59  
60

## Safety

The incidence of any AE was similar between treatment groups irrespective of age or sex (**Table 2**). There were more drug-related AEs with finerenone than placebo in age and sex subgroups except premenopausal females, where the incidence was similar. AEs leading to drug discontinuation were more frequent in patients given finerenone than placebo (6.4% and 5.4%, respectively), with higher incidences in the 65 to 74 and  $\geq 75$  years groups than the  $< 65$  years group; there were more AEs leading to drug discontinuation with finerenone than placebo in males and premenopausal females but not in postmenopausal females.

Although the incidences of any serious AEs (SAEs), study drug-related SAEs, or SAEs leading to drug discontinuation were similar between treatment arms across all age and sex subgroups, the overall incidences of SAEs increased with age and was highest in males, followed by postmenopausal females, then premenopausal females.

In all age and sex subgroups, the incidences of treatment-emergent hypotension AEs were higher with finerenone than placebo but did not have a substantial impact on related clinical outcomes, including falls, dizziness, and fatigue. The incidence of hypotension in patients treated with finerenone increased with age (**Table 2**).

In FIDELITY, finerenone increased the risk of any hyperkalemia event versus placebo; similar findings were observed in all age and sex subgroups, except premenopausal females (**Table 2**). The incidences of any hyperkalemia AEs leading to discontinuation of study drug and any serious hyperkalemia AEs leading to hospitalization were low across all age and sex subgroups ( $< 3\%$  and  $< 2\%$ , respectively). However, the relative risk of treatment discontinuation because of hyperkalemia with finerenone versus placebo increased with advancing age (relative risk [95% CI] for ages 45 to 64, 65 to 74, and  $\geq 75$  years: 2.2 [1.2 to 4.3], 2.8 [1.7 to 4.7], and 4.4 [1.8 to 10.8], respectively). Treatment-emergent serum

1  
2  
3 potassium levels >5.5 mmol/L and >6.0 mmol/L were more frequent with finerenone than  
4 placebo, being consistent across all age and sex subgroups. The incidence of gynecomastia  
5 in males was the same with finerenone (0.2%) and placebo (0.2%) across all ages.  
6  
7  
8  
9

## 10 Discussion

11  
12  
13 In this post hoc analysis, finerenone demonstrated reduced risk of CV and kidney composite  
14 outcomes versus placebo across all age and sex subcategories. In FIDELITY, HHF was the  
15 main driver of CV benefit with finerenone<sup>24</sup>; lower incidences of HHF with finerenone versus  
16 placebo were observed in this analysis across all age subgroups, with some differences  
17 noted between sex subgroups. Moreover, the incidences of any AEs or SAEs were similar  
18 between the treatment groups regardless of age and sex.  
19  
20  
21  
22  
23  
24  
25  
26  
27

28 The results for the CV outcome in this analysis are consistent with findings from other studies  
29 of MRAs in HF. In TOPCAT (Treatment of Preserved Cardiac Function Heart Failure with an  
30 Aldosterone Antagonist), age did not affect the efficacy of spironolactone in patients with HF,  
31  
32  
33  
34  
35  
36  
37  
38  
39  
40  
41  
42  
43  
44  
45  
46  
47  
48  
49  
50  
51  
52  
53  
54  
55  
56  
57  
58  
59  
60  
28 and in analyses of HF studies (RALES [Effect of Spironolactone on Morbidity and Mortality  
in Patients with Severe Heart Failure], EMPHASIS-HF [Eplerenone in Patients with Systolic  
Heart Failure and Mild Symptoms], and TOPCAT), MRAs reduced morbidity and mortality in  
elderly patients,<sup>29</sup> demonstrating a consistent benefit regardless of sex.<sup>30</sup> In contrast to our  
results, female sex was associated with poorer kidney outcomes versus male sex in patients  
receiving a steroidal MRA for bilateral primary aldosteronism.<sup>31</sup> The MR can be activated by  
different drivers in different diseases; MR activation in diabetes is driven by additional factors  
other than high aldosterone in comparison with primary aldosteronism, which may account  
for differences in outcomes observed across different indications.<sup>32</sup>

55 In this study, although the elderly population had higher risk of certain AEs (e.g.,  
56 hypotension, AEs leading to discontinuation, and death), they occurred less frequently with  
57 finerenone than placebo. Hyperkalemia was more prevalent with finerenone but was

1  
2  
3 generally similar across age and sex. In a FIDELIO-DKD subanalysis, younger age and  
4 female sex were independent risk factors for hyperkalemia (>6.0 mmol/L).<sup>33</sup> Similar findings  
5 for age were observed in TOPCAT post hoc data for patients with HF.<sup>28</sup> Steroidal MRAs have  
6 been associated with gynecomastia in males,<sup>34,35</sup> which was not observed in this study, most  
7 likely because finerenone has no detectable affinity for androgen receptors.<sup>35</sup>  
8  
9  
10  
11  
12  
13  
14

15 Preclinical data suggest that different molecular mechanisms drive endothelial dysfunction in  
16 male and female mice<sup>36,37</sup> and that increased age and male sex are associated with MR  
17 overactivation, which is linked to vascular stiffness and endothelial dysfunction.<sup>38,39</sup> In human  
18 aortic smooth muscle cells, MR expression increased with age, leading to epigenetic  
19 changes associated with increased vascular stiffness. These effects were reversed with MR  
20 inhibition.<sup>40</sup> In vitro, MR expression in the whole aortae and early passage aortic vascular  
21 smooth muscle cells was increased in aged (30 months) versus adult (8 months) rat cells.<sup>38</sup>  
22 In a preclinical mouse model, aortic stiffness occurred earlier in male than female mice and  
23 correlated with the timing of increased aortic MR expression; vascular stiffness was  
24 prevented in smooth muscle cell MR-deficient mice.<sup>39</sup> These data suggest that elderly males  
25 may derive the greatest benefit from finerenone; indeed, in this analysis, finerenone-treated  
26 males had lower risk of the CV composite outcome and HHF versus placebo across age  
27 groups, including >75 years. Moreover, statistical heterogeneity was observed for HHF by  
28 sex, persisting after adjustment for differences in baseline characteristics, with a more  
29 pronounced effect of finerenone to reduce HHF versus placebo in males than females.  
30  
31  
32  
33  
34  
35  
36  
37  
38  
39  
40  
41  
42  
43  
44  
45  
46  
47  
48

49 In this study, markers of kidney damage (eGFR decline and UACR) were reduced with  
50 finerenone in age subgroups; however, no benefit on kidney outcomes was observed in the  
51 >75 years age group. The small sample size of this subgroup precluded definitive  
52 conclusions, which may be accounted for by the slowing rate of CKD progression with  
53 advancing age.<sup>41,42</sup>  
54  
55  
56  
57  
58  
59  
60



1  
2  
3 Limitations include the study being a post hoc analysis and the chosen age categories not  
4 being predefined. In addition, patients may have initiated other treatments during the study.  
5  
6 Sample size and number of events for premenopausal females were relatively small,  
7  
8 resulting in uncertainty around the estimates for this subgroup. Results for premenopausal  
9  
10 females versus postmenopausal females/males should be interpreted with caution because  
11  
12 age may partly account for differences observed; the average age of premenopausal females  
13  
14 was ~45 years old compared with postmenopausal females (~66 years old) and males (~65  
15  
16 years old) (**Table 1**). As such, these groups had different baseline characteristics. Higher  
17  
18 baseline mean eGFR and median UACR, and lower history of CV comorbidities and  
19  
20 hypotension were observed in premenopausal females versus males and postmenopausal  
21  
22 females. Additionally, the study design and tests performed may have been underpowered to  
23  
24 address the research questions. Furthermore, FIDELITY limitations, mainly the small  
25  
26 proportion of Black patients and exclusion of patients with nonalbuminuric CKD, were  
27  
28 present in this analysis.  
29  
30  
31  
32  
33

34  
35 In conclusion, this post hoc FIDELITY analysis suggests that finerenone effectively lowers  
36  
37 the risk of clinically important cardiorenal outcomes in patients with CKD and T2D across  
38  
39 ages and sexes, with no new safety concerns in those aged >65 years or by sex. These data  
40  
41 highlight the therapeutic potential of finerenone in older patients and both sexes in patients  
42  
43 with CKD and T2D.  
44  
45  
46  
47  
48  
49  
50  
51  
52  
53  
54  
55  
56  
57  
58  
59  
60

## Acknowledgments

Medical writing assistance was provided by Chameleon Communications International, and was funded by Bayer AG.

## Funding

This work was supported by Bayer AG, who funded the FIDELIO-DKD and FIGARO-DKD studies and combined analysis.

## Contributors:

SB prepared the initial analysis and interpretation of data, as well as the initial manuscript draft, which was then reviewed and edited by all authors. All authors vouch for the completeness and accuracy of the data and agreed to submit the manuscript for publication.

The funder had a role in the design and conduct of the study; collection, management, analysis, and interpretation of the data; preparation, review, or approval of the manuscript; and decision to submit the manuscript for publication.

## Disclosures

**SB** reports research support from 3ive, Bayer, Boehringer Ingelheim, Novartis, and Novo Nordisk; honorarium from UpToDate; consultancy fees from Baxter; and speaker bureau fees from Home Dialysis University and PD Excellence Academy.

**MEFC** reports consultancy fees from AstraZeneca, Bayer, Boehringer Ingelheim, and Fresenius Medical Care, and research support from Baxter and Fresenius.

**RB** reports consultancy fees from AstraZeneca, Bayer, Boehringer Ingelheim, Gilead, MSD, Mundipharma, Sanofi, and Servier.

**SDA** reports grants from Abbott Vascular and Vifor International; and personal fees from Amgen, AstraZeneca, Bayer, Boehringer Ingelheim, BioVentrix, Brahms, Cardiac Dimensions, Cardior, Cordio, CVRx, Edwards, Impulse Dynamics, Janssen, Novartis, Occlutech, Respicardia, Servier, Vectorious, and V-Wave.

1  
2  
3 **GLB** reports consultancy fees from Alnylam, Ionis, and Merck.  
4

5 **GF** is a trial committee member for Amgen, Bayer (no fees received), Boehringer Ingelheim,  
6  
7 Medtronic, Novartis, Servier, and Vifor.  
8

9 **PR** reports personal fees from Bayer during the conduct of the study; he has received  
10  
11 research support and personal fees from AstraZeneca and Novo Nordisk, and personal fees  
12  
13 from Astellas, Boehringer Ingelheim, Eli Lilly, Gilead, Mundipharma, Sanofi, and Vifor; all  
14  
15 fees are given to Steno Diabetes Center Copenhagen.  
16

17 **LMR** reports consultancy fees from Bayer.  
18

19 **AEF, PK, AL, and MA** are all full-time employees of Bayer.  
20

21  
22 **BP** reports consultant fees for AstraZeneca, Bayer, Boehringer Ingelheim, Brainstorm  
23  
24 Medical, Cereno Scientific, G3 Pharmaceuticals, KBP Biosciences, PhaseBio, Proton Intel,  
25  
26 Sanofi/Lexicon, Sarfez, scPharmaceuticals, SQ Innovation, Tricida, and Vifor/Relypsa; he  
27  
28 has stock options for Brainstorm Medical, Cereno Scientific, G3 Pharmaceuticals, KBP  
29  
30 Biosciences, Proton Intel, Sarfez, scPharmaceuticals, SQ Innovation, Tricida, and  
31  
32 Vifor/Relypsa; he also holds a patent for site-specific delivery of eplerenone to the  
33  
34 myocardium (US patent #9931412) and a provisional patent for histone-acetylation-  
35  
36 modulating agents for the treatment and prevention of organ injury (provisional patent US  
37  
38 63/045,784).  
39  
40

## 41 **Data sharing statement**

42  
43  
44  
45 Data not currently available

46  
47 Will data be available: Yes

48  
49 Where: Electronic repository

50  
51 When will data availability begin: Date to be confirmed by Bayer  
52  
53  
54  
55  
56  
57  
58  
59  
60

## References

1. Halter JB, Musi N, McFarland Horne F, *et al*. Diabetes and cardiovascular disease in older adults: Current status and future directions. *Diabetes* 2014;63:2578–89.
2. Maric-Bilkan C. Sex differences in micro- and macro-vascular complications of diabetes mellitus. *Clin Sci (Lond)* 2017;131:833–46.
3. Melsom T, Norvik JV, Enoksen IT, *et al*. Sex differences in age-related loss of kidney function. *J Am Soc Nephrol* 2022;33:1891–902.
4. Bairey Merz CN, Dember LM, Ingelfinger JR, *et al*. Sex and the kidneys: Current understanding and research opportunities. *Nat Rev Nephrol* 2019;15:776–83.
5. Maric-Bilkan C. Sex differences in diabetic kidney disease. *Mayo Clin Proc* 2020;95:587–99.
6. Yu MK, Lyles CR, Bent-Shaw LA, *et al*. Risk factor, age and sex differences in chronic kidney disease prevalence in a diabetic cohort: The Pathways Study. *Am J Nephrol* 2012;36:245–51.
7. Wiviott SD, Raz I, Bonaca MP, *et al*. Dapagliflozin and cardiovascular outcomes in type 2 diabetes. *N Engl J Med* 2019;380:347–57.
8. Heerspink HJL, Stefánsson BV, Correa-Rotter R, *et al*. Dapagliflozin in patients with chronic kidney disease. *N Engl J Med* 2020;383:1436–46.
9. Zannad F, Ferreira JP, Pocock SJ, *et al*. Cardiac and kidney benefits of empagliflozin in heart failure across the spectrum of kidney function: Insights from EMPEROR-Reduced. *Circulation* 2021;143:310–21.
10. Perkovic V, Jardine MJ, Neal B, *et al*. Canagliflozin and renal outcomes in type 2 diabetes and nephropathy. *N Engl J Med* 2019;380:2295–306.
11. Chertow GM, Block GA, Correa-Rotter R, *et al*. Effect of cinacalcet on cardiovascular disease in patients undergoing dialysis. *N Engl J Med* 2012;367:2482–94.

12. Tuttle KR, Alicic RZ, Duru OK, *et al.* Clinical characteristics of and risk factors for chronic kidney disease among adults and children: An analysis of the CURE-CKD registry. *JAMA Netw Open* 2019;2:e1918169.
13. Gasparini A, Evans M, Coresh J, *et al.* Prevalence and recognition of chronic kidney disease in Stockholm healthcare. *Nephrol Dial Transplant* 2016;31:2086–94.
14. Buonafine M, Bonnard B, Jaisser F. Mineralocorticoid receptor and cardiovascular disease. *Am J Hypertens* 2018;31:1165–74.
15. Luther JM, Fogo AB. The role of mineralocorticoid receptor activation in kidney inflammation and fibrosis. *Kidney Int Suppl* 2022;12:63–8.
16. Henschkowski J, Stuck AE, Frey BM, *et al.* Age-dependent decrease in 11beta-hydroxysteroid dehydrogenase type 2 (11beta-HSD2) activity in hypertensive patients. *Am J Hypertens* 2008;21:644–9.
17. Kolkhof P, Jaisser F, Kim SY, *et al.* Steroidal and novel non-steroidal mineralocorticoid receptor antagonists in heart failure and cardiorenal diseases: comparison at bench and bedside. *Handb Exp Pharmacol* 2017;243:271–305.
18. Pitt B. The role of mineralocorticoid receptor antagonists (MRAs) in very old patients with heart failure. *Heart Fail Rev* 2012;17:573–9.
19. Cole TJ, Young MJ. 30 years of the mineralocorticoid receptor: Mineralocorticoid receptor null mice: Informing cell-type-specific roles. *J Endocrinol* 2017;234:T83–T92.
20. Nakamura T, Girerd S, Jaisser F, *et al.* Nonepithelial mineralocorticoid receptor activation as a determinant of kidney disease. *Kidney Int Suppl* 2022;12:12–8.
21. Wheeler DC, Stefánsson BV, Jongs N, *et al.* Effects of dapagliflozin on major adverse kidney and cardiovascular events in patients with diabetic and non-diabetic chronic kidney disease: A prespecified analysis from the DAPA-CKD trial. *Lancet Diabetes Endocrinol* 2021;9:22–31.
22. Brenner BM, Cooper ME, de Zeeuw D, *et al.* Effects of losartan on renal and cardiovascular outcomes in patients with type 2 diabetes and nephropathy. *N Engl J Med* 2001;345:861–9.

- 1  
2  
3 23. Heerspink HJL, Parving HH, Andress DL, *et al.* Atrasentan and renal events in  
4 patients with type 2 diabetes and chronic kidney disease (SONAR): A double-blind,  
5 randomised, placebo-controlled trial. *Lancet* 2019;393:1937–47.  
6  
7  
8
- 9 24. Agarwal R, Filippatos G, Pitt B, *et al.* Cardiovascular and kidney outcomes with  
10 finerenone in patients with type 2 diabetes and chronic kidney disease: the FIDELITY  
11 pooled analysis. *Eur Heart J* 2022;43:474–84.  
12  
13  
14
- 15 25. Bakris GL, Agarwal R, Anker SD, *et al.* Effect of finerenone on chronic kidney disease  
16 outcomes in type 2 diabetes. *N Engl J Med* 2020;383:2219–29.  
17  
18  
19
- 20 26. Pitt B, Filippatos G, Agarwal R, *et al.* Cardiovascular events with finerenone in kidney  
21 disease and type 2 diabetes. *N Engl J Med* 2021;385:2252–63.  
22  
23  
24
- 25 27. Vonesh E, Tighiouart H, Ying J, *et al.* Mixed-effects models for slope-based endpoints  
26 in clinical trials of chronic kidney disease. *Stat Med* 2019;38:4218–39.  
27  
28  
29
- 30 28. Vardeny O, Claggett B, Vaduganathan M, *et al.* Influence of age on efficacy and  
31 safety of spironolactone in heart failure. *JACC Heart Fail* 2019;7:1022–8.  
32  
33  
34
- 35 29. Ferreira JP, Rossello X, Eschalier R, *et al.* MRAs in elderly HF patients: Individual  
36 patient-data meta-analysis of RALES, EMPHASIS-HF, and TOPCAT. *JACC Heart*  
37 *Fail* 2019;7:1012–21.  
38  
39  
40
- 41 30. Rossello X, Ferreira JP, Pocock SJ, *et al.* Sex differences in mineralocorticoid  
42 receptor antagonist trials: A pooled analysis of three large clinical trials. *Eur J Heart*  
43 *Fail* 2020;22:834–44.  
44  
45  
46
- 47 31. Nakamaru R, Yamamoto K, Akasaka H, *et al.* Sex differences in renal outcomes after  
48 medical treatment for bilateral primary aldosteronism. *Hypertension* 2021;77:537–45.  
49  
50  
51
- 52 32. Kawanami D, Takashi Y, Muta Y, *et al.* Mineralocorticoid receptor antagonists in  
53 diabetic kidney disease. *Front Pharmacol* 2021;12:754239.  
54  
55  
56
- 57 33. Agarwal R, Joseph A, Anker SD, *et al.* Hyperkalemia risk with finerenone: Results  
58 from the FIDELIO-DKD trial. *J Am Soc Nephrol* 2022;33:225–37.  
59  
60

- 1  
2  
3 34. Hasegawa T, Nishiwaki H, Ota E, *et al*. Aldosterone antagonists for people with  
4 chronic kidney disease requiring dialysis. *Cochrane Database Syst Rev*  
5 2021;2:Cd013109.  
6  
7
- 8  
9 35. Kolkhof P, Joseph A, Kintscher U. Nonsteroidal mineralocorticoid receptor  
10 antagonism for cardiovascular and renal disorders – new perspectives for  
11 combination therapy. *Pharmacol Res* 2021;172:105859.  
12  
13
- 14 36. Davel AP, Jaffe IZ, Tostes RC, *et al*. New roles of aldosterone and mineralocorticoid  
15 receptors in cardiovascular disease: Translational and sex-specific effects. *Am J*  
16 *Physiol Heart Circ Physiol* 2018;315:H989–H99.  
17  
18
- 19 37. Faulkner JL, Kennard S, Huby AC, *et al*. Progesterone predisposes females to  
20 obesity-associated leptin-mediated endothelial dysfunction via upregulating  
21 endothelial MR (mineralocorticoid receptor) expression. *Hypertension* 2019;74:678–  
22 86.  
23  
24
- 25 38. Krug AW, Allenhofer L, Monticone R, *et al*. Elevated mineralocorticoid receptor  
26 activity in aged rat vascular smooth muscle cells promotes a proinflammatory  
27 phenotype via extracellular signal-regulated kinase 1/2 mitogen-activated protein  
28 kinase and epidermal growth factor receptor-dependent pathways. *Hypertension*  
29 2010;55:1476–83.  
30  
31
- 32 39. DuPont JJ, Kim SK, Kenney RM, *et al*. Sex differences in the time course and  
33 mechanisms of vascular and cardiac aging in mice: Role of the smooth muscle cell  
34 mineralocorticoid receptor. *Am J Physiol Heart Circ Physiol* 2021;320:H169–H80.  
35  
36
- 37 40. Ibarrola J, Kim SK, Lu Q, *et al*. Smooth muscle mineralocorticoid receptor as an  
38 epigenetic regulator of vascular aging. *Cardiovasc Res* 2023;118:3386–400.  
39  
40
- 41 41. Mathur R, Dreyer G, Yaqoob MM, *et al*. Ethnic differences in the progression of  
42 chronic kidney disease and risk of death in a UK diabetic population: An  
43 observational cohort study. *BMJ open* 2018;8:e020145.  
44  
45  
46  
47  
48  
49  
50  
51  
52  
53  
54  
55  
56  
57  
58  
59  
60

- 1  
2  
3 42. Go AS, Yang J, Tan TC, *et al*. Contemporary rates and predictors of fast progression  
4 of chronic kidney disease in adults with and without diabetes mellitus. *BMC Nephrol*  
5  
6  
7 2018;19:146.  
8  
9  
10  
11  
12  
13  
14  
15  
16  
17  
18  
19  
20  
21  
22  
23  
24  
25  
26  
27  
28  
29  
30  
31  
32  
33  
34  
35  
36  
37  
38  
39  
40  
41  
42  
43  
44  
45  
46  
47  
48  
49  
50  
51  
52  
53  
54  
55  
56  
57  
58  
59  
60

For peer review only



## Tables

Table 1. Patient Baseline Characteristics According to Age and Sex

|                                                       | Age                   |                         |                       | Sex               |                                    |                                      |
|-------------------------------------------------------|-----------------------|-------------------------|-----------------------|-------------------|------------------------------------|--------------------------------------|
|                                                       | <65 Years<br>(n=5889) | 65–74 Years<br>(n=5221) | ≥75 Years<br>(n=1916) | Male<br>(n=9088)  | Premenopausal<br>Female<br>(n=323) | Postmenopausal<br>Female<br>(n=3615) |
| Sex, n (%)                                            |                       |                         |                       | Age, y, mean ± SD |                                    |                                      |
| Female                                                | 1839 (31.2)           | 1501 (28.7)             | 598 (31.2)            | 64.8 ± 9.5        | 45.1 ± 4.9                         | 66.3 ± 8.0                           |
| Male                                                  | 4050 (68.8)           | 3720 (71.3)             | 1318 (68.8)           |                   |                                    |                                      |
| Race, n (%)                                           |                       |                         |                       |                   |                                    |                                      |
| Asian                                                 | 1591 (27.0)           | 997 (19.1)              | 306 (16.0)            | 2136 (23.5)       | 87 (26.9)                          | 671 (18.6)                           |
| Black/African American                                | 309 (5.2)             | 160 (3.1)               | 53 (2.8)              | 284 (3.1)         | 37 (11.5)                          | 201 (5.6)                            |
| White                                                 | 3592 (61.0)           | 3817 (73.1)             | 1460 (76.2)           | 6231 (68.6)       | 167 (51.7)                         | 2471 (68.4)                          |
| Other <sup>a</sup>                                    | 397 (6.7)             | 247 (4.7)               | 97 (5.1)              | 437 (4.8)         | 32 (9.9)                           | 272 (7.5)                            |
| Systolic blood pressure, mm Hg, mean (SD)             | 135.6 ± 14.0          | 137.4 ± 14.2            | 138.4 ± 14.6          | 136.8 ± 14.2      | 133.0 ± 14.0                       | 136.9 ± 14.3                         |
| Diastolic blood pressure, mm Hg, mean (SD)            | 78.8 ± 9.1            | 74.9 ± 9.4              | 72.8 ± 9.8            | 76.5 ± 9.7        | 80.1 ± 8.4                         | 75.6 ± 9.5                           |
| Duration of diabetes, years, mean (SD)                | 13.5 ± 7.6            | 16.4 ± 8.6              | 18.6 ± 10.4           | 15.3 ± 8.5        | 10.6 ± 7.0                         | 16.0 ± 9.1                           |
| HbA1c, %, mean (SD)                                   | 7.9 ± 1.5             | 7.6 ± 1.3               | 7.4 ± 1.2             | 7.6 ± 1.3         | 8.2 ± 1.7                          | 7.9 ± 1.4                            |
| Serum potassium, mmol/L, mean (SD)                    | 4.4 ± 0.5             | 4.4 ± 0.4               | 4.4 ± 0.4             | 4.3 ± 0.4         | 4.3 ± 0.4                          | 4.4 ± 0.4                            |
| eGFR, mL/min/1.73 m <sup>2</sup> , mean (SD)          | 64.3 ± 24.0           | 53.5 ± 18.5             | 48.1 ± 15.1           | 57.7 ± 21.2       | 77.0 ± 28.9                        | 55.6 ± 21.3                          |
| eGFR, mL/min/1.73 m <sup>2</sup> , n (%) <sup>b</sup> |                       |                         |                       |                   |                                    |                                      |

|                                                 | Age                      |                          |                         | Sex                      |                                    |                                      |
|-------------------------------------------------|--------------------------|--------------------------|-------------------------|--------------------------|------------------------------------|--------------------------------------|
|                                                 | <65 Years<br>(n=5889)    | 65–74 Years<br>(n=5221)  | ≥75 Years<br>(n=1916)   | Male<br>(n=9088)         | Premenopausal<br>Female<br>(n=323) | Postmenopausal<br>Female<br>(n=3615) |
| <25                                             | 53 (0.9)                 | 72 (1.4)                 | 37 (1.9)                | 98 (1.1)                 | 2 (0.6)                            | 62 (1.7)                             |
| 25–<45                                          | 1448 (24.6)              | 1898 (36.4)              | 886 (46.2)              | 2871 (31.6)              | 57 (17.6)                          | 1304 (36.1)                          |
| 45–<60                                          | 1315 (22.3)              | 1514 (29.0)              | 605 (31.6)              | 2468 (27.2)              | 50 (15.5)                          | 916 (25.3)                           |
| ≥60                                             | 3071 (52.1)              | 1736 (33.3)              | 388 (20.3)              | 3651 (40.2)              | 214 (66.3)                         | 1330 (36.8)                          |
| UACR, mg/g, median (IQR)                        | 650.48<br>(315.2–1363.5) | 438.63<br>(154.1–1030.7) | 332.29<br>(107.8–830.5) | 511.53<br>(200.9–1130.1) | 793.52<br>(376.6–1547.3)           | 501.47<br>(173.6–1149.1)             |
| UACR, mg/g, <i>n</i> (%) <sup>c</sup>           |                          |                          |                         |                          |                                    |                                      |
| <30                                             | 79 (1.3)                 | 103 (2.0)                | 48 (2.5)                | 137 (1.5)                | 3 (0.9)                            | 90 (2.5)                             |
| 30–<300                                         | 1331 (22.6)              | 1907 (36.5)              | 861 (44.9)              | 2881 (31.7)              | 54 (16.7)                          | 1164 (32.2)                          |
| ≥300                                            | 4475 (76.0)              | 3210 (61.5)              | 1007 (52.6)             | 6068 (66.8)              | 266 (82.4)                         | 2358 (65.2)                          |
| BMI, kg/m <sup>2</sup> , mean (SD)              | 32.0 ± 6.4               | 31.1 ± 5.7               | 29.6 ± 5.0              | 31.0 ± 5.6               | 34.1 ± 7.9                         | 32.0 ± 6.6                           |
| Current smoker, <i>n</i> (%)                    | 1283 (21.8)              | 686 (13.1)               | 124 (6.5)               | 1730 (19.0)              | 35 (10.8)                          | 328 (9.1)                            |
| History of CV disease, present, <i>n</i> (%)    | 2188 (37.2)              | 2667 (51.1)              | 1080 (56.4)             | 4374 (48.1)              | 56 (17.3)                          | 1505 (41.6)                          |
| History of heart failure                        | 413 (7.0)                | 432 (8.3)                | 162 (8.5)               | 630 (6.9)                | 22 (6.8)                           | 355 (9.8)                            |
| History of atrial fibrillation/atrial flutter   | 266 (4.5)                | 547 (10.5)               | 293 (15.3)              | 867 (9.5)                | 0                                  | 239 (6.6)                            |
| Baseline medications, <i>n</i> (%) <sup>d</sup> |                          |                          |                         |                          |                                    |                                      |
| RAS inhibitors (ACEis/ARBs)                     | 5876 (99.8)              | 5213 (99.8)              | 1914 (99.9)             | 9069 (99.8)              | 323 (100.0)                        | 3611 (99.9)                          |
| Beta-blockers                                   | 2619 (44.5)              | 2849 (54.6)              | 1036 (54.1)             | 4545 (50.0)              | 111 (34.4)                         | 1848 (51.1)                          |
| Diuretics                                       | 2790 (47.4)              | 2813 (53.9)              | 1107 (57.8)             | 4706 (51.8)              | 137 (42.4)                         | 1867 (51.6)                          |
| Statins                                         | 4033 (68.5)              | 3920 (75.1)              | 1446 (75.5)             | 6696 (73.7)              | 203 (62.8)                         | 2500 (69.2)                          |
| Calcium channel blockers                        | 3127 (53.1)              | 3052 (58.5)              | 1179 (61.5)             | 5208 (57.3)              | 149 (46.1)                         | 2001 (55.4)                          |

|                                                       | Age                   |                         |                       | Sex              |                                    |                                      |
|-------------------------------------------------------|-----------------------|-------------------------|-----------------------|------------------|------------------------------------|--------------------------------------|
|                                                       | <65 Years<br>(n=5889) | 65–74 Years<br>(n=5221) | ≥75 Years<br>(n=1916) | Male<br>(n=9088) | Premenopausal<br>Female<br>(n=323) | Postmenopausal<br>Female<br>(n=3615) |
| ≥1 glucose-lowering medication,<br>n (%) <sup>d</sup> | 5779 (98.1)           | 5111 (97.9)             | 1830 (95.5)           | 8860 (97.5)      | 317 (98.1)                         | 3543 (98.0)                          |
| Insulin                                               | 3637 (61.8)           | 3020 (57.8)             | 973 (50.8)            | 5203 (57.3)      | 193 (59.8)                         | 2234 (61.8)                          |
| GLP-1RA                                               | 492 (8.4)             | 378 (7.2)               | 74 (3.9)              | 676 (7.4)        | 30 (9.3)                           | 238 (6.6)                            |
| SGLT-2i                                               | 517 (8.8)             | 289 (5.5)               | 71 (3.7)              | 671 (7.4)        | 36 (11.1)                          | 170 (4.7)                            |

ACEi = angiotensin-converting enzyme inhibitor; ARB = angiotensin receptor blocker; BMI = body mass index; CV = cardiovascular; eGFR = estimated glomerular filtration rate; GLP-1RA = glucagon-like peptide-1 receptor agonist; HbA1c = glycated hemoglobin; IQR = interquartile range; RAS = renin–angiotensin system; SD = standard deviation; SGLT-2i = sodium-glucose co-transporter-2 inhibitor; UACR = urine albumin-to-creatinine ratio.

<sup>a</sup> Other: included American Indian/Alaska Native, Native Hawaiian/other Pacific, not reported, multiple.

<sup>b</sup> Missing (eGFR): <65 years, n=2; 65 to 74 years, n=1; postmenopausal female, n=3.

<sup>c</sup> Missing (UACR): <65 years, n=4; 65 to 74 years, n = 1; male, n=2; postmenopausal female, n=3.

<sup>d</sup> Analysis allowed multiple drug groups for the same drug.

Table 2. Treatment-Emergent AEs According to Age and Sex

| n (%)                                                      | Age                 |                  |                     |                  |                    |                 | Sex                 |                  |                        |                 |                         |                  |
|------------------------------------------------------------|---------------------|------------------|---------------------|------------------|--------------------|-----------------|---------------------|------------------|------------------------|-----------------|-------------------------|------------------|
|                                                            | <65 Years           |                  | 65–74 Years         |                  | ≥75 Years          |                 | Male                |                  | Female (Premenopausal) |                 | Female (Postmenopausal) |                  |
|                                                            | Finerenone (n=2953) | Placebo (n=2926) | Finerenone (n=2631) | Placebo (n=2578) | Finerenone (n=926) | Placebo (n=985) | Finerenone (n=4476) | Placebo (n=4595) | Finerenone (n=163)     | Placebo (n=160) | Finerenone (n=1871)     | Placebo (n=1734) |
| Any AE                                                     | 2494 (84.5)         | 2523 (86.2)      | 2301 (87.5)         | 2225 (86.3)      | 807 (87.1)         | 859 (87.2)      | 3899 (87.1)         | 4011 (87.3)      | 137 (84.0)             | 138 (86.3)      | 1566 (83.7)             | 1458 (84.1)      |
| Related to study drug                                      | 478 (16.2)          | 384 (13.1)       | 558 (21.2)          | 337 (13.1)       | 170 (18.4)         | 141 (14.3)      | 884 (19.7)          | 612 (13.3)       | 21 (12.9)              | 20 (12.5)       | 301 (16.1)              | 230 (13.3)       |
| Leading to discontinuation                                 | 128 (4.3)           | 124 (4.2)        | 212 (8.1)           | 153 (5.9)        | 74 (8.0)           | 74 (7.5)        | 313 (7.0)           | 249 (5.4)        | 9 (5.5)                | 7 (4.4)         | 92 (4.9)                | 95 (5.5)         |
| Any SAE                                                    | 856 (29.0)          | 938 (32.1)       | 871 (33.1)          | 876 (34.0)       | 333 (36.0)         | 372 (37.8)      | 1487 (33.2)         | 1590 (34.6)      | 33 (20.2)              | 42 (26.3)       | 540 (28.9)              | 554 (31.9)       |
| Related to study drug                                      | 29 (1.0)            | 27 (0.9)         | 39 (1.5)            | 17 (0.7)         | 15 (1.6)           | 17 (1.7)        | 56 (1.3)            | 46 (1.0)         | 0                      | 1 (0.6)         | 27 (1.4)                | 14 (0.8)         |
| Leading to discontinuation                                 | 41 (1.4)            | 48 (1.6)         | 75 (2.9)            | 71 (2.8)         | 29 (3.1)           | 35 (3.6)        | 115 (2.6)           | 112 (2.4)        | 1 (0.6)                | 2 (1.3)         | 29 (1.5)                | 40 (2.3)         |
| Any AE leading to death                                    | 43 (1.5)            | 55 (1.9)         | 42 (1.6)            | 62 (2.4)         | 25 (2.7)           | 34 (3.5)        | 73 (1.6)            | 115 (2.5)        | 0                      | 3 (1.9)         | 37 (2.0)                | 33 (1.9)         |
| <b>AEs of interest</b>                                     |                     |                  |                     |                  |                    |                 |                     |                  |                        |                 |                         |                  |
| Hypotension                                                | 101 (3.4)           | 70 (2.4)         | 127 (4.8)           | 76 (2.9)         | 54 (5.8)           | 31 (3.1)        | 216 (4.8)           | 131 (2.9)        | 3 (1.8)                | 0               | 63 (3.4)                | 46 (2.7)         |
| Orthostatic hypotension                                    | 18 (0.6)            | 15 (0.5)         | 23 (0.9)            | 15 (0.6)         | 5 (0.5)            | 9 (0.9)         | 34 (0.8)            | 30 (0.7)         | 0                      | 2 (1.3)         | 12 (0.6)                | 7 (0.4)          |
| Hyperkalemia                                               | 360 (12.2)          | 238 (8.1)        | 420 (16.0)          | 158 (6.1)        | 132 (14.3)         | 52 (5.3)        | 647 (14.5)          | 304 (6.6)        | 14 (8.6)               | 16 (10.0)       | 251 (13.4)              | 128 (7.4)        |
| Leading to permanent discontinuation                       | 31 (1.0)            | 13 (0.4)         | 54 (2.1)            | 19 (0.7)         | 25 (2.7)           | 6 (0.6)         | 83 (1.9)            | 28 (0.6)         | 4 (2.5)                | 1 (0.6)         | 23 (1.2)                | 9 (0.5)          |
| Classified as a serious AE                                 | 28 (0.9)            | 8 (0.3)          | 29 (1.1)            | 5 (0.2)          | 12 (1.3)           | 3 (0.3)         | 45 (1.0)            | 9 (0.2)          | 1 (0.6)                | 0               | 23 (1.2)                | 7 (0.4)          |
| Leading to hospitalization                                 | 26 (0.9)            | 6 (0.2)          | 25 (1.0)            | 2 (<0.1)         | 10 (1.1)           | 2 (0.2)         | 38 (0.8)            | 5 (0.1)          | 1 (0.6)                | 0               | 22 (1.2)                | 5 (0.3)          |
| Gynecomastia                                               | 2 (<0.1)            | 4 (0.1)          | 5 (0.2)             | 3 (0.1)          | 1 (0.1)            | 4 (0.4)         | 8 (0.2)             | 11 (0.2)         | NA                     | NA              | NA                      | NA               |
| <b>Central laboratory assessments, n/N (%)<sup>a</sup></b> |                     |                  |                     |                  |                    |                 |                     |                  |                        |                 |                         |                  |

1  
2  
3  
4  
5  
6  
7  
8  
9  
10  
11  
12  
13  
14  
15  
16  
17  
18  
19  
20  
21  
22  
23  
24  
25  
26  
27  
28  
29  
30  
31  
32  
33  
34  
35  
36  
37  
38  
39  
40  
41  
42  
43  
44  
45  
46

|                             |                 |                |                 |                |                |              |                 |                |               |             |                 |                |
|-----------------------------|-----------------|----------------|-----------------|----------------|----------------|--------------|-----------------|----------------|---------------|-------------|-----------------|----------------|
| Serum potassium >5.5 mmol/L | 444/2904 (15.3) | 233/2871 (8.1) | 460/2585 (17.8) | 180/2529 (7.1) | 171/913 (18.7) | 57/970 (5.9) | 720/4403 (16.4) | 308/4523 (6.8) | 16/159 (10.1) | 8/154 (5.2) | 339/1840 (18.4) | 154/1693 (9.1) |
| Serum potassium >6.0 mmol/L | 90/2926 (3.1)   | 44/2896 (1.5)  | 89/2598 (3.4)   | 31/2544 (1.2)  | 32/915 (3.5)   | 5/973 (0.5)  | 143/4428 (3.2)  | 48/4544 (1.1)  | 4/160 (2.5)   | 1/156 (0.6) | 64/1851 (3.5)   | 31/1713 (1.8)  |

AE = adverse event; NA = not applicable; SAE = serious adverse event.

<sup>a</sup> The “n” numerator represents the number of patients at risk with ≥1 treatment-emergent laboratory assessment meeting the criterion. The “N” denominator represents all patients at risk for a treatment-emergent laboratory abnormality. Patients had both a baseline and postbaseline treatment-emergent value while the baseline value did not exceed the displayed threshold.

For peer review only

## Figure Legends

**Figure 1.** Analysis of CV composite outcome and HHF according to (A) age and (B) sex. CV composite outcome includes CV death, nonfatal myocardial infarction, nonfatal stroke, or HHF. CI = confidence interval; CV = cardiovascular; HHF = hospitalization for heart failure; PY = patient-years.

**Figure 2.** Analysis of kidney composite outcome according to (A) age and (B) sex. Kidney composite outcome includes kidney failure, sustained  $\geq 57\%$  eGFR decline, or renal death. CI = confidence interval; eGFR = estimated glomerular filtration rate; PY = patient-years.

**Figure 3.** LS mean change in eGFR from baseline, chronic, and total slopes over time by age.

Chronic eGFR slope from month 4 to end-of-study visit.

CI = confidence interval; eGFR = estimated glomerular filtration rate; LS = least-squares

1  
2  
3  
4  
5  
6  
7  
8  
9  
10  
11  
12  
13  
14  
15  
16  
17  
18  
19  
20  
21  
22  
23  
24  
25

**BMJ Open**  
33 292 patients screened

20 121 excluded  
18 513 did not meet eligibility criteria  
719 withdrew  
889 had other reason

13 171 underwent randomization

6589 randomized to finerenone

6582 randomized to placebo

70 excluded from analyses due to critical GCP violations

75 excluded from analyses due to critical GCP violations

13 026 randomized patients included in the FAS

1831 discontinued trial regimen  
584 had adverse or outcome event  
301 had finerenone discontinued by physician  
37 did not complete treatment due to COVID-19  
2044 died  
402 withdrew

1815 discontinued trial regimen  
568 had adverse or outcome event  
242 had placebo discontinued by physician  
35 did not complete treatment due to COVID-19  
408 died  
387 withdrew

6519 included in FAS  
6505 completed<sup>a</sup> the study  
14 had vital status unknown:  
5 withdrew consent  
9 lost to follow-up

6507 included in FAS  
6485 completed<sup>a</sup> the study  
22 had vital status unknown:  
10 withdrew consent  
9 lost to follow-up

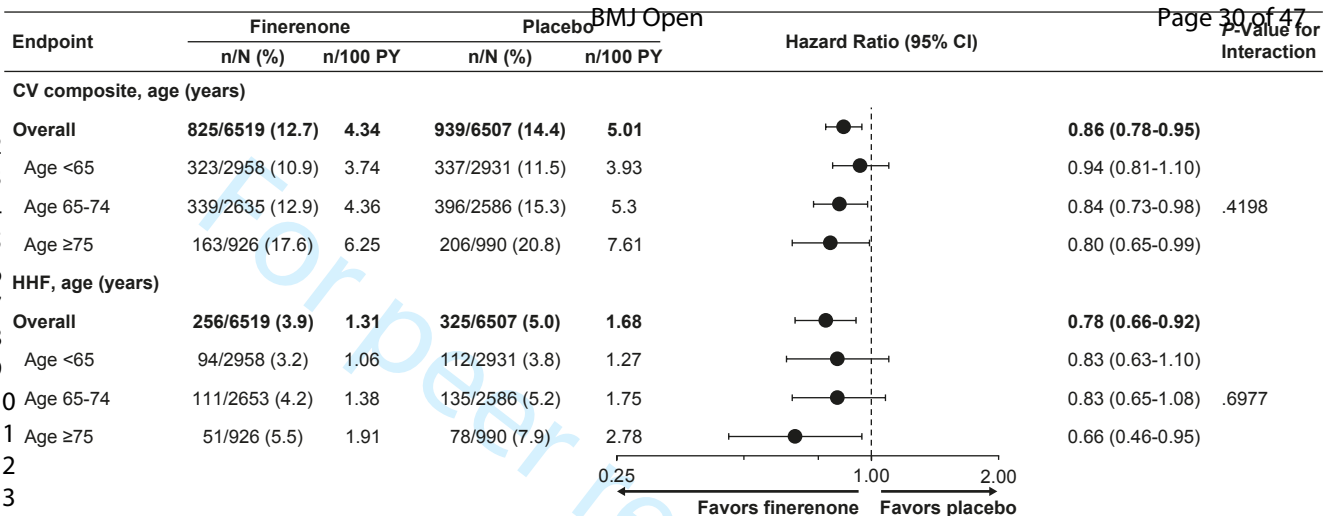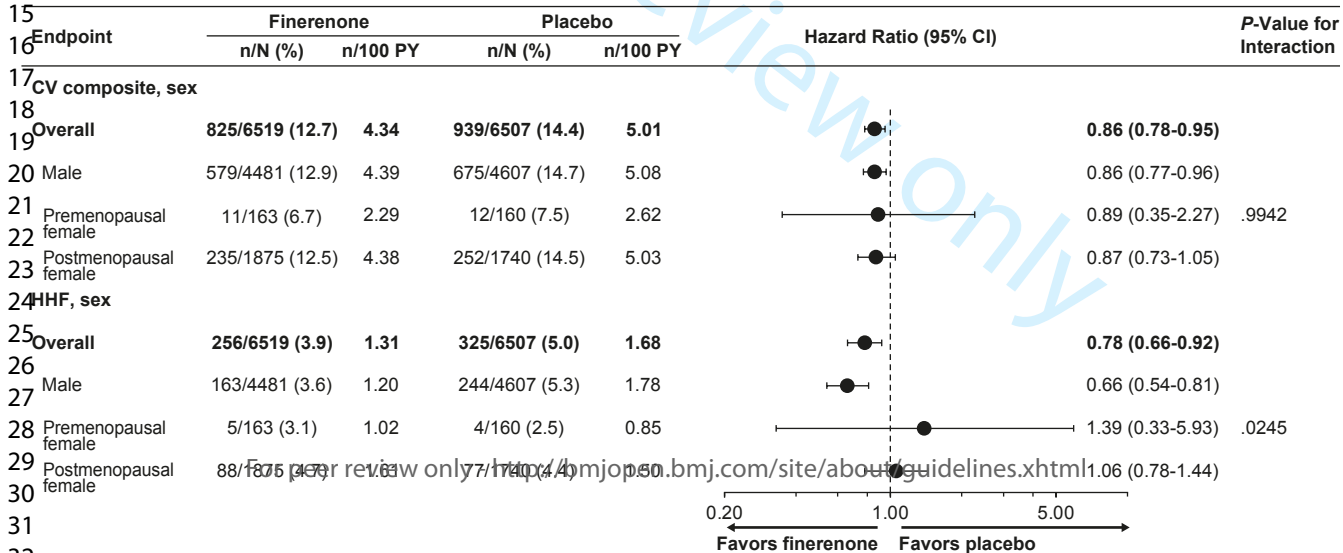



A

| Endpoint                             | Finerenone     |          | Placebo        |          | Hazard Ratio (95% CI) | P-Value for Interaction |
|--------------------------------------|----------------|----------|----------------|----------|-----------------------|-------------------------|
|                                      | n/N (%)        | n/100 PY | n/N (%)        | n/100 PY |                       |                         |
| <b>Kidney composite, age (years)</b> |                |          |                |          |                       |                         |
| 1 Overall                            | 360/6519 (5.5) | 1.96     | 465/6507 (7.1) | 2.55     | 0.77 (0.67-0.88)      |                         |
| 2 Age <65                            | 202/2958 (6.8) | 2.44     | 266/2931 (9.1) | 3.21     | 0.76 (0.63-0.92)      |                         |
| 3 Age 65-74                          | 123/2635 (4.7) | 1.63     | 162/2586 (6.3) | 2.23     | 0.75 (0.59-0.95)      | .5088                   |
| 4 Age ≥75                            | 35/926 (3.8)   | 1.41     | 37/990 (3.7)   | 1.40     | 0.98 (0.61-1.57)      |                         |

B

| Endpoint                     | Finerenone     |          | Placebo        |          | Hazard Ratio (95% CI) | P-Value for Interaction |
|------------------------------|----------------|----------|----------------|----------|-----------------------|-------------------------|
|                              | n/N (%)        | n/100 PY | n/N (%)        | n/100 PY |                       |                         |
| <b>Kidney composite, sex</b> |                |          |                |          |                       |                         |
| 1 Overall                    | 360/6519 (5.5) | 1.96     | 465/6507 (7.1) | 2.55     | 0.77 (0.67-0.88)      |                         |
| 2 Male                       | 257/4481 (5.7) | 2.02     | 341/4607 (7.4) | 2.63     | 0.75 (0.64-0.89)      |                         |
| 3 Premenopausal female       | 11/163 (6.7)   | 2.48     | 13/160 (8.1)   | 3.16     | 0.67 (0.28-1.62)      | .8524                   |
| 4 Postmenopausal female      | 92/1875 (4.9)  | 1.79     | 111/1740 (6.4) | 2.30     | 0.81 (0.61-1.07)      |                         |

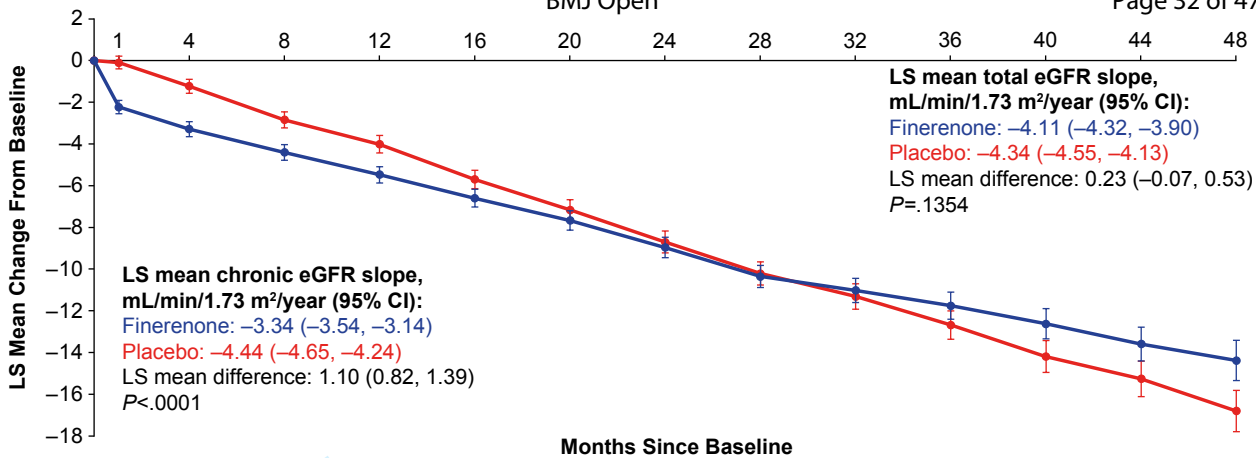

Number of Subjects at Visit

|            |      |      |      |      |      |      |      |      |      |      |      |     |     |
|------------|------|------|------|------|------|------|------|------|------|------|------|-----|-----|
| Finerenone | 2921 | 2849 | 2778 | 2730 | 2656 | 2505 | 2281 | 1918 | 1541 | 1246 | 962  | 716 | 409 |
| Placebo    | 2892 | 2829 | 2779 | 2719 | 2649 | 2491 | 2226 | 1952 | 1566 | 1271 | 1006 | 731 | 417 |

B 65 to 74 Years

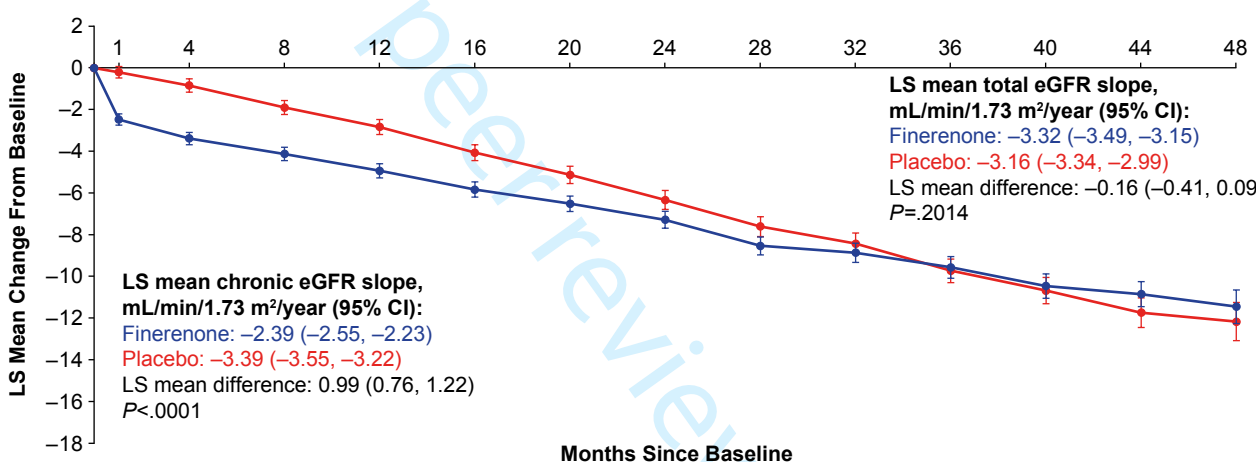

Number of Subjects at Visit

|            |      |      |      |      |      |      |      |      |      |      |     |     |     |
|------------|------|------|------|------|------|------|------|------|------|------|-----|-----|-----|
| Finerenone | 2597 | 2536 | 2474 | 2460 | 2388 | 2220 | 1995 | 1732 | 1462 | 1158 | 935 | 663 | 387 |
| Placebo    | 2539 | 2481 | 2429 | 2376 | 2326 | 2163 | 1951 | 1674 | 1360 | 1097 | 876 | 637 | 346 |

C ≥75 Years

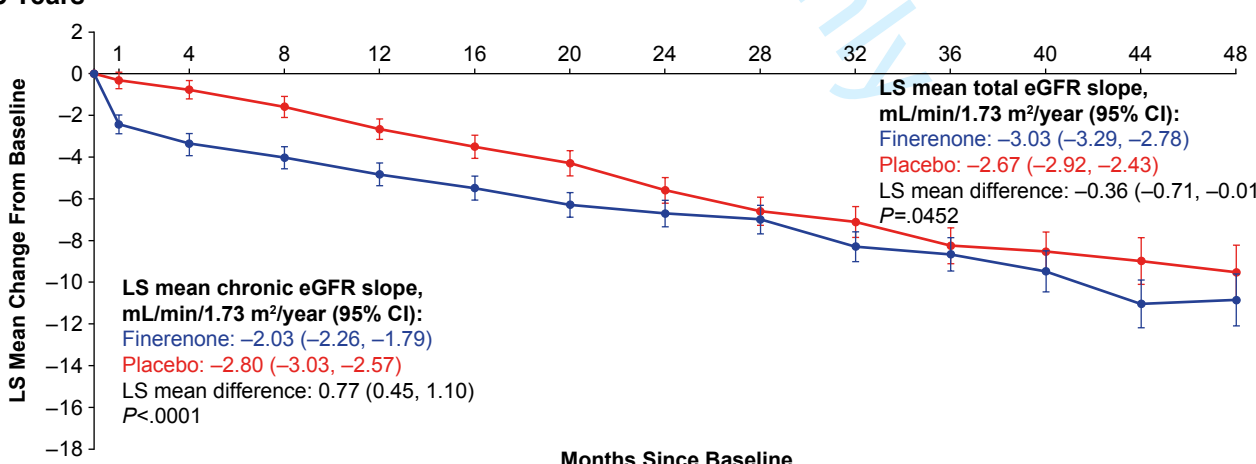

Number of Subjects at Visit

|            |     |     |     |     |     |     |     |     |     |     |     |     |     |
|------------|-----|-----|-----|-----|-----|-----|-----|-----|-----|-----|-----|-----|-----|
| Finerenone | 910 | 877 | 848 | 825 | 792 | 732 | 647 | 567 | 447 | 363 | 277 | 210 | 115 |
| Placebo    | 975 | 934 | 896 | 850 | 780 | 696 | 606 | 511 | 401 | 359 | 281 | 204 | 117 |

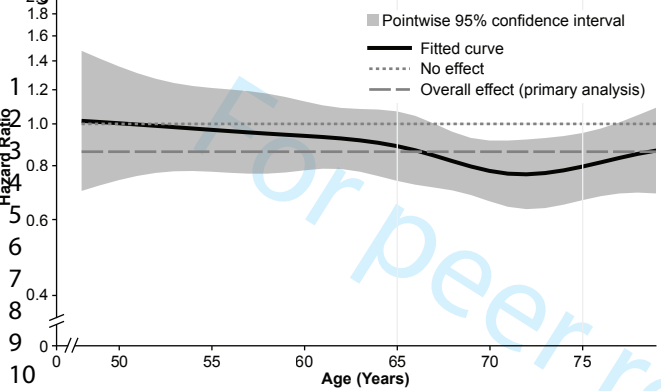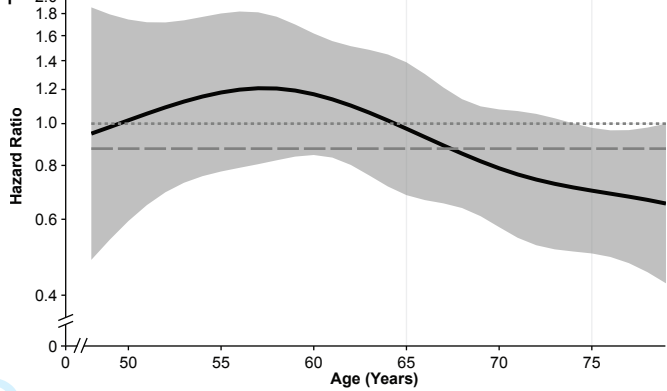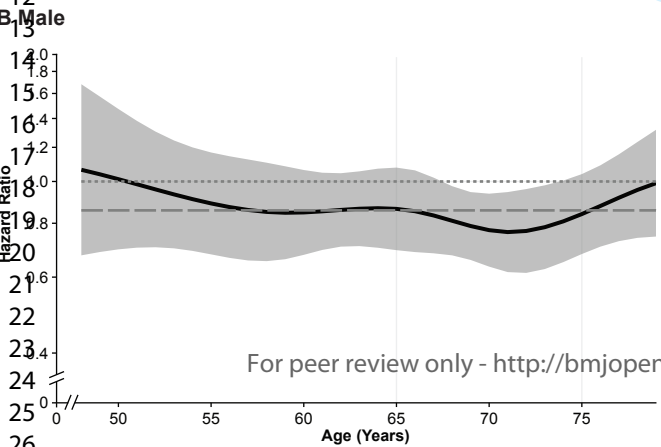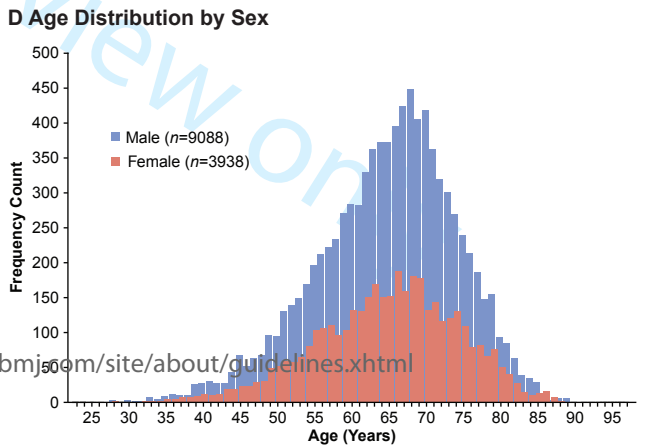

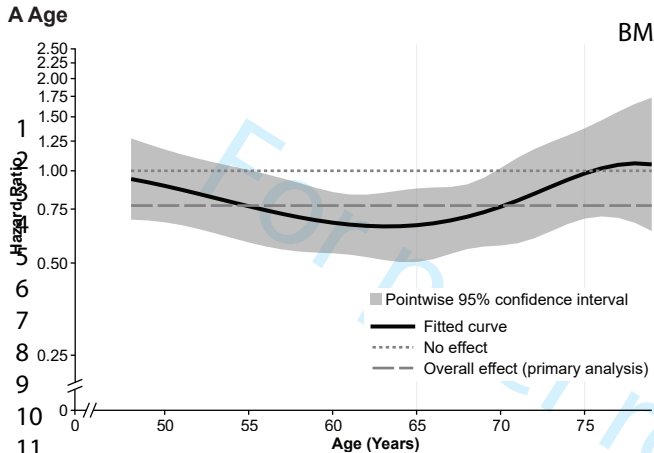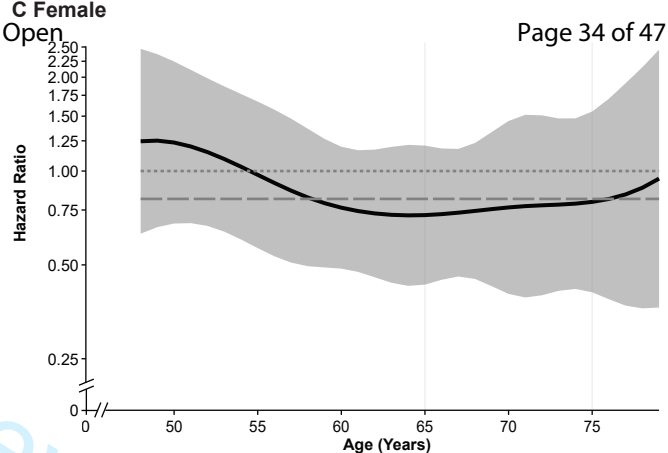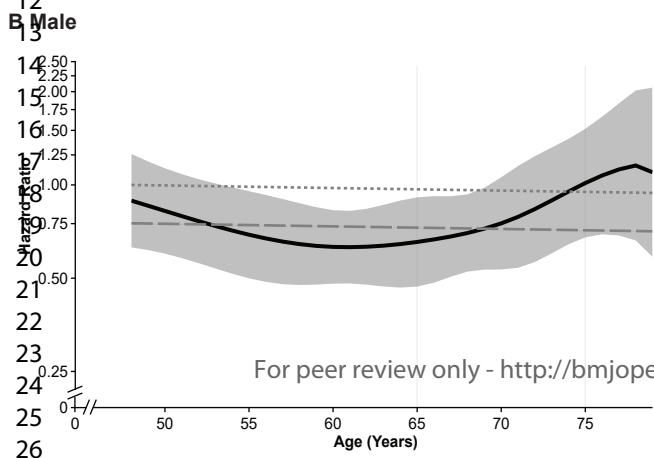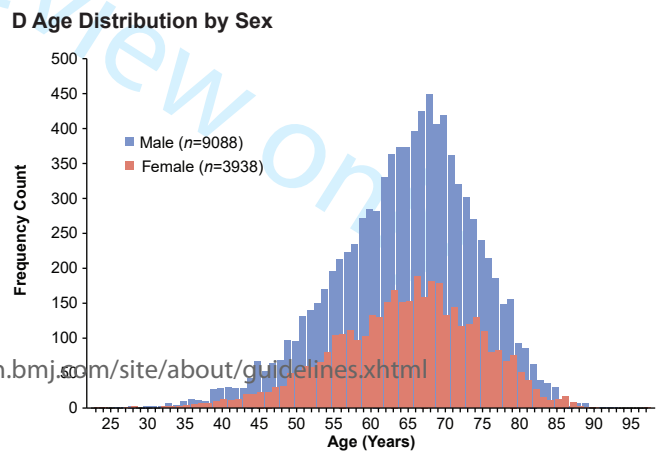

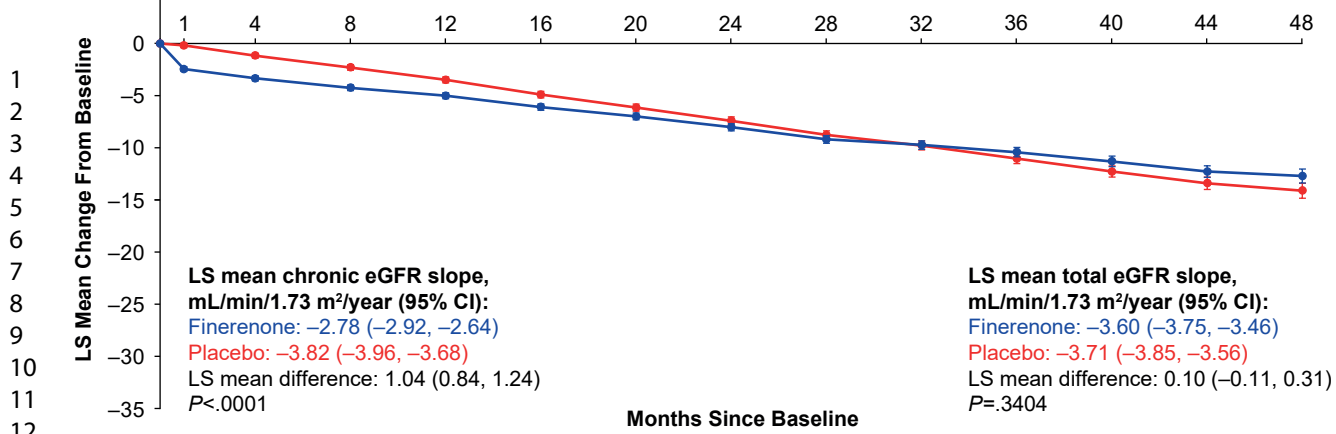

**Number of Subjects at Visit**

|            |      |      |      |      |      |      |      |      |      |      |      |      |     |
|------------|------|------|------|------|------|------|------|------|------|------|------|------|-----|
| Finerenone | 4423 | 4314 | 4215 | 4154 | 4016 | 3774 | 3409 | 2934 | 2410 | 1937 | 1550 | 1148 | 670 |
| Placebo    | 4544 | 4423 | 4336 | 4243 | 4126 | 3847 | 3456 | 1985 | 2413 | 1955 | 1549 | 1158 | 652 |

**B Premenopausal Female**

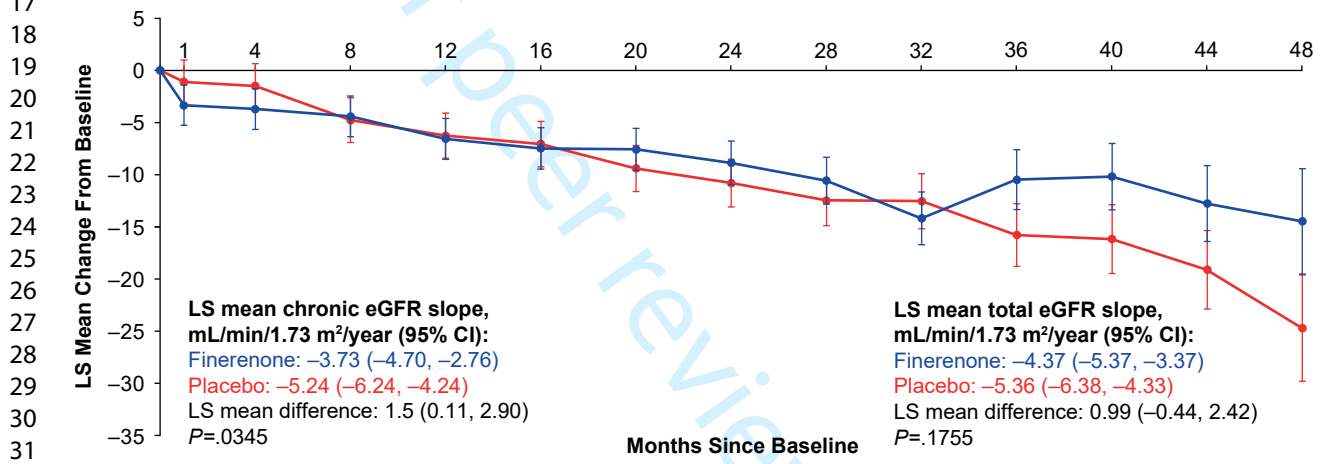

**Number of Subjects at Visit**

|            |     |     |     |     |     |     |     |     |    |    |    |    |    |
|------------|-----|-----|-----|-----|-----|-----|-----|-----|----|----|----|----|----|
| Finerenone | 161 | 154 | 152 | 151 | 146 | 140 | 124 | 102 | 75 | 57 | 47 | 36 | 21 |
| Placebo    | 156 | 148 | 143 | 141 | 137 | 131 | 118 | 99  | 77 | 57 | 46 | 33 | 15 |

**C Postmenopausal Female**

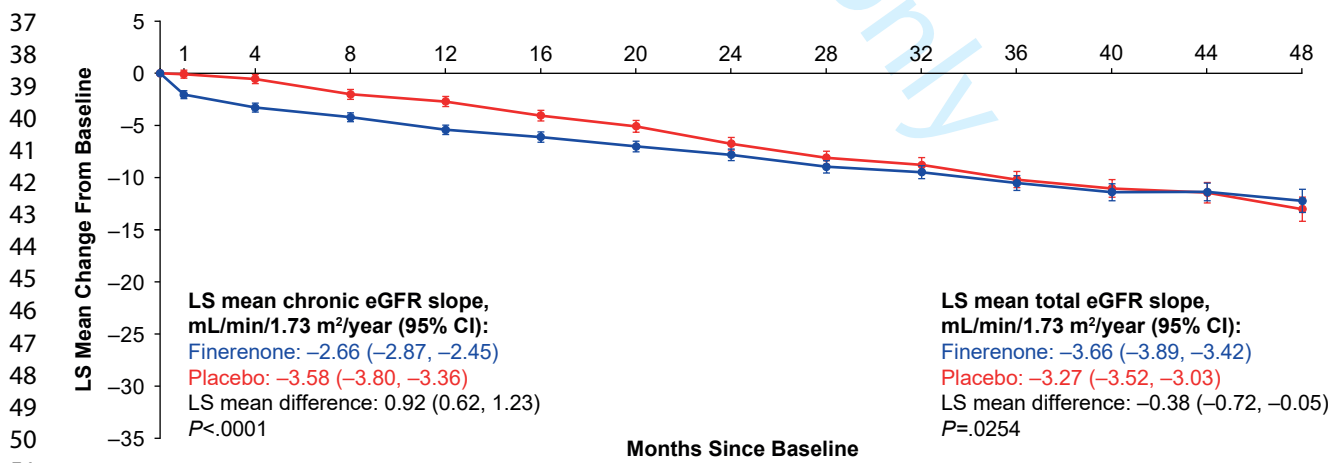

**Number of Subjects at Visit**

|            |      |      |      |      |      |      |      |      |     |     |     |     |     |
|------------|------|------|------|------|------|------|------|------|-----|-----|-----|-----|-----|
| Finerenone | 1844 | 1794 | 1733 | 1710 | 1674 | 1543 | 1390 | 1181 | 965 | 773 | 577 | 405 | 220 |
| Placebo    | 1706 | 1673 | 1647 | 1607 | 1562 | 1456 | 1298 | 1120 | 917 | 715 | 568 | 381 | 213 |

A

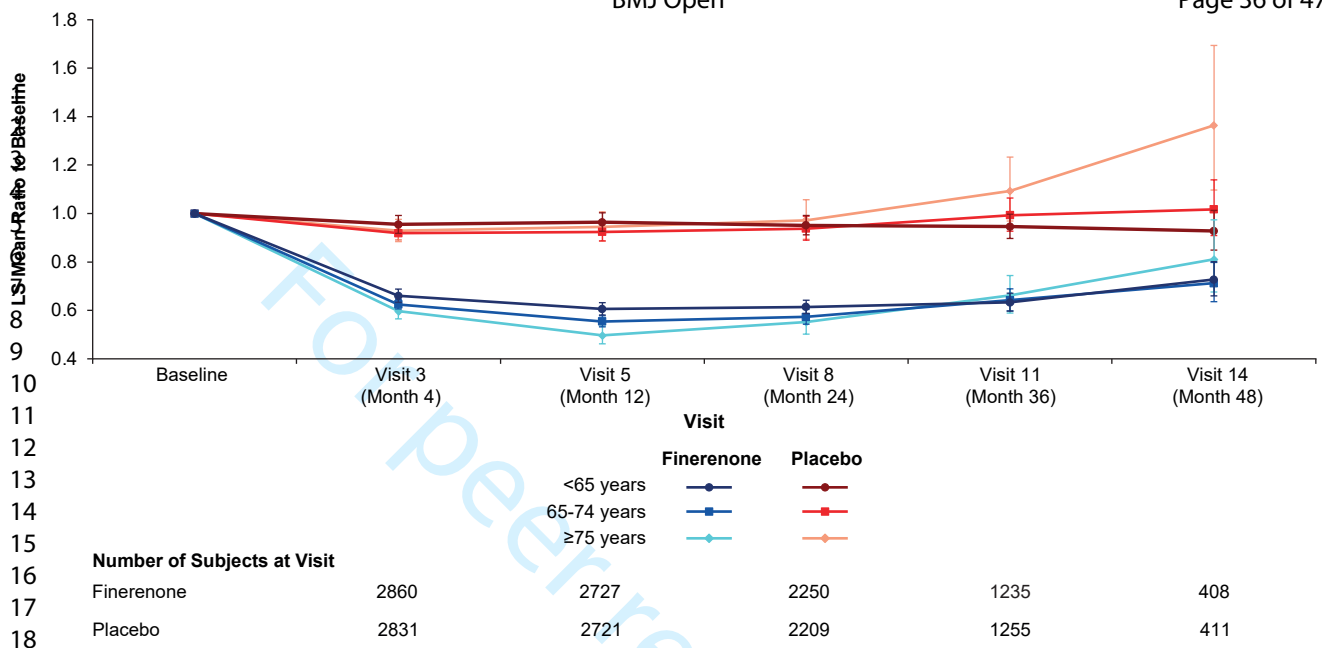

B

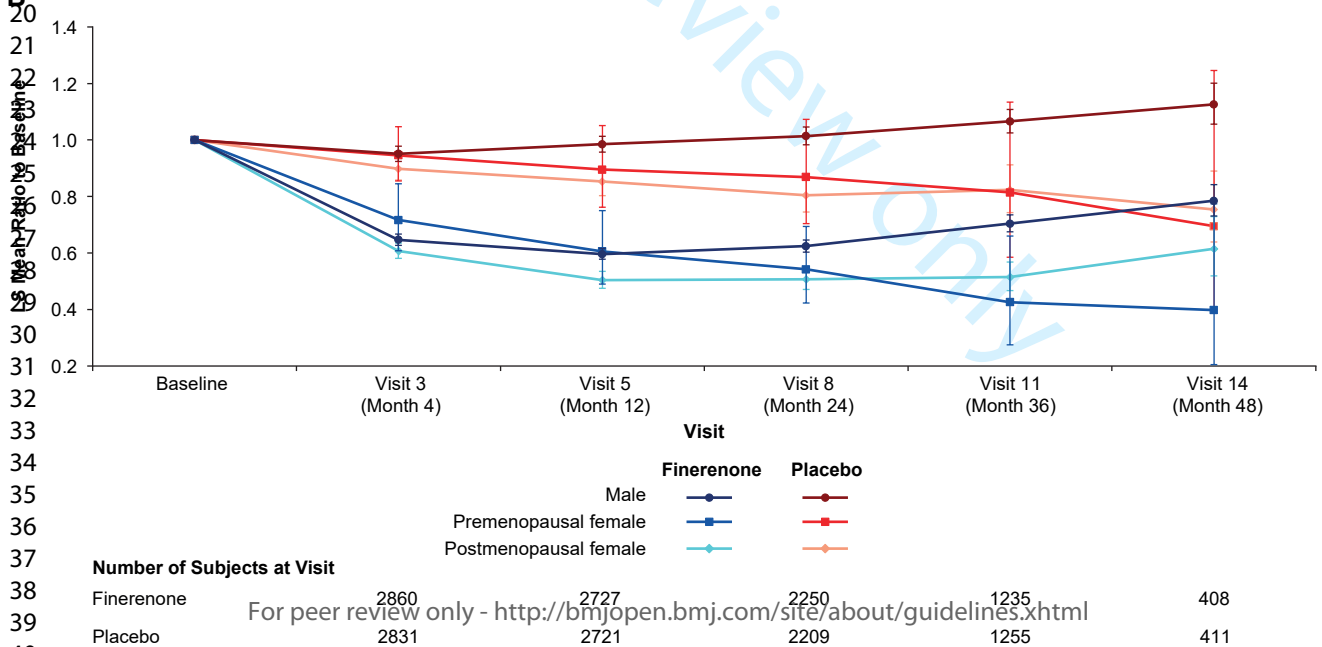

## Cardiorenal Outcomes by Age and Sex in Patients Treated With Finerenone:

### FIDELITY Post Hoc Analysis

#### Contents

|                                                                                                                                                                                                                                                     |   |
|-----------------------------------------------------------------------------------------------------------------------------------------------------------------------------------------------------------------------------------------------------|---|
| Cardiorenal Outcomes by Age and Sex in Patients Treated With Finerenone: FIDELITY Post Hoc Analysis .....                                                                                                                                           | 1 |
| Supplementary Tables and Figures .....                                                                                                                                                                                                              | 2 |
| eTable 1. Patient Baseline Characteristics According to Age and Sex Stratified by Treatment Group .....                                                                                                                                             | 2 |
| eFigure 1. Hazard ratio (finerenone vs. placebo) as a function of age modeled with cubic splines for CV composite outcome by age (A), spline for hazard ratio of CV composite outcomes by sex (B, C) and age distribution by sex (D).....           | 5 |
| eFigure 2. Hazard ratio (finerenone vs. placebo) as a function of age modeled with cubic splines for kidney composite outcome by age (A), spline for hazard ratio of kidney composite outcomes by sex (B, C) and age distribution by sex (D). ..... | 6 |
| eFigure 3. LS mean change in eGFR from baseline, chronic, and total slopes over time by sex. ....                                                                                                                                                   | 7 |
| eFigure 4. LS mean ratio to baseline UACR over time by age and sex. ....                                                                                                                                                                            | 8 |
| eFigure 5. FIDELITY CONSORT diagram. ....                                                                                                                                                                                                           | 9 |

## Supplementary Tables and Figures

eTable 1. Patient Baseline Characteristics According to Age and Sex Stratified by Treatment Group

| n (%)                                      | Age                 |                  |                     |                  |                    |                 | Sex                 |                  |                        |                 |                         |                  |
|--------------------------------------------|---------------------|------------------|---------------------|------------------|--------------------|-----------------|---------------------|------------------|------------------------|-----------------|-------------------------|------------------|
|                                            | <65 Years           |                  | 65-74 Years         |                  | ≥75 Years          |                 | Male                |                  | Female (Premenopausal) |                 | Female (Postmenopausal) |                  |
|                                            | Finerenone (n=2958) | Placebo (n=2931) | Finerenone (n=2635) | Placebo (n=2586) | Finerenone (n=926) | Placebo (n=990) | Finerenone (n=4481) | Placebo (n=4607) | Finerenone (n=163)     | Placebo (n=160) | Finerenone (n=1875)     | Placebo (n=1740) |
| Sex, n (%)                                 |                     |                  |                     |                  |                    |                 | Age, y, mean ± SD   |                  |                        |                 |                         |                  |
| Female                                     | 959 (32.4)          | 880 (30.0)       | 772 (29.3)          | 729 (28.2)       | 307 (33.2)         | 291 (29.4)      | 64.8 ± 9.3          | 64.9 ± 9.6       | 45.3 ± 4.4             | 44.9 ± 5.4      | 66.2 ± 8.0              | 66.4 ± 8.0       |
| Male                                       | 1999 (67.6)         | 2051 (70.0)      | 1863 (70.7)         | 1857 (71.8)      | 619 (66.8)         | 699 (70.6)      |                     |                  |                        |                 |                         |                  |
| Race, n (%)                                |                     |                  |                     |                  |                    |                 |                     |                  |                        |                 |                         |                  |
| Asian                                      | 772 (26.1)          | 819 (27.9)       | 518 (19.7)          | 479 (18.5)       | 142 (15.3)         | 164 (16.6)      | 1032 (23.0)         | 1104 (24.0)      | 45 (27.6)              | 42 (26.3)       | 355 (18.9)              | 316 (18.2)       |
| Black/African American                     | 158 (5.3)           | 151 (5.2)        | 75 (2.8)            | 85 (3.3)         | 20 (2.2)           | 33 (3.3)        | 137 (3.1)           | 147 (3.2)        | 17 (10.4)              | 20 (12.5)       | 99 (5.3)                | 102 (5.9)        |
| White                                      | 1827 (61.8)         | 1765 (60.2)      | 1908 (72.4)         | 1909 (73.8)      | 714 (77.1)         | 746 (75.4)      | 3099 (69.2)         | 3132 (68.0)      | 84 (51.5)              | 83 (51.9)       | 1266 (67.5)             | 1205 (69.3)      |
| Other <sup>a</sup>                         | 201 (6.8)           | 196 (6.7)        | 134 (5.1)           | 113 (4.4)        | 50 (5.4)           | 47 (4.7)        | 213 (4.8)           | 224 (4.9)        | 17 (10.4)              | 15 (9.4)        | 155 (8.3)               | 117 (6.7)        |
| Systolic blood pressure, mm Hg, mean (SD)  | 135.7 ± 13.9        | 135.5 ± 14.1     | 137.4 ± 14.2        | 137.5 ± 14.2     | 138.4 ± 14.6       | 138.5 ± 14.6    | 136.9 ± 14.1        | 136.7 ± 14.3     | 131.6 ± 13.1           | 134.4 ± 14.7    | 136.8 ± 14.4            | 136.9 ± 14.0     |
| Diastolic blood pressure, mm Hg, mean (SD) | 78.7 ± 9.2          | 79.0 ± 8.9       | 74.8 ± 9.4          | 74.9 ± 9.4       | 73.2 ± 9.8         | 72.4 ± 9.8      | 76.6 ± 9.7          | 76.5 ± 9.7       | 78.7 ± 8.2             | 81.6 ± 8.4      | 75.6 ± 9.6              | 75.6 ± 9.4       |
| Duration of diabetes, y, mean (SD)         | 13.6 ± 7.6          | 13.3 ± 7.7       | 16.4 ± 8.7          | 16.5 ± 8.5       | 18.7 ± 10.7        | 18.5 ± 10.2     | 15.4 ± 8.6          | 15.3 ± 8.4       | 11.0 ± 7.4             | 10.1 ± 6.5      | 15.9 ± 9.0              | 16.0 ± 9.2       |
| HbA1c, %, mean (SD)                        | 7.9 ± 1.5           | 7.9 ± 1.5        | 7.6 ± 1.3           | 7.6 ± 1.3        | 7.5 ± 1.2          | 7.4 ± 1.2       | 7.6 ± 1.3           | 7.6 ± 1.3        | 8.1 ± 1.7              | 8.3 ± 1.6       | 7.9 ± 1.4               | 7.9 ± 1.5        |
| Serum potassium, mmol/L, mean (SD)         | 4.3 ± 0.4           | 4.4 ± 0.5        | 4.4 ± 0.4           | 4.4 ± 0.4        | 4.4 ± 0.4          | 4.4 ± 0.4       | 4.3 ± 0.4           | 4.3 ± 0.5        | 4.3 ± 0.4              | 4.4 ± 0.4       | 4.4 ± 0.4               | 4.4 ± 0.4        |



| n (%)                                                 | Age                  |                      |                      |                      |                      |                     | Sex                  |                      |                        |                      |                         |                      |
|-------------------------------------------------------|----------------------|----------------------|----------------------|----------------------|----------------------|---------------------|----------------------|----------------------|------------------------|----------------------|-------------------------|----------------------|
|                                                       | <65 Years            |                      | 65-74 Years          |                      | ≥75 Years            |                     | Male                 |                      | Female (Premenopausal) |                      | Female (Postmenopausal) |                      |
|                                                       | Finerenone (n=2958)  | Placebo (n=2931)     | Finerenone (n=2635)  | Placebo (n=2586)     | Finerenone (n=926)   | Placebo (n=990)     | Finerenone (n=4481)  | Placebo (n=4607)     | Finerenone (n=163)     | Placebo (n=160)      | Finerenone (n=1875)     | Placebo (n=1740)     |
| eGFR, mL/min/1.73 m <sup>2</sup> , mean (SD)          | 63.9 ± 23.9          | 64.6 ± 24.0          | 53.7 ± 18.4          | 53.3 ± 18.6          | 48.0 ± 15.5          | 48.3 ± 14.8         | 57.8 ± 21.0          | 57.7 ± 21.4          | 76.3 ± 28.7            | 77.5 ± 29.1          | 55.3 ± 21.5             | 55.8 ± 21.1          |
| eGFR, mL/min/1.73 m <sup>2</sup> , n (%) <sup>b</sup> |                      |                      |                      |                      |                      |                     |                      |                      |                        |                      |                         |                      |
| <25                                                   | 24 (0.8)             | 29 (1.0)             | 35 (1.3)             | 37 (1.4)             | 22 (2.4)             | 15 (1.5)            | 44 (1.0)             | 54 (1.2)             | 0                      | 2 (1.3)              | 37 (2.0)                | 25 (1.4)             |
| 25-<45                                                | 744 (25.2)           | 704 (24.0)           | 937 (35.6)           | 961 (37.2)           | 436 (47.1)           | 450 (45.5)          | 1392 (31.1)          | 1479 (32.1)          | 31 (19.0)              | 26 (16.3)            | 694 (37.0)              | 610 (35.1)           |
| 45-<60                                                | 666 (22.5)           | 649 (22.1)           | 775 (29.4)           | 739 (28.6)           | 276 (29.8)           | 329 (33.2)          | 1240 (27.7)          | 1228 (26.7)          | 26 (16.0)              | 24 (15.0)            | 451 (24.1)              | 465 (26.7)           |
| 6□                                                    | 1523 (51.5)          | 1548 (52.8)          | 888 (33.7)           | 848 (32.8)           | 192 (20.7)           | 196 (19.8)          | 1805 (40.3)          | 1846 (40.1)          | 106 (65.0)             | 108 (67.5)           | 692 (36.9)              | 638 (36.7)           |
| UACR, mg/g, median (IQR)                              | 649.2 (308.0-1331.8) | 651.4 (322.5-1382.2) | 433.8 (150.7-1025.7) | 441.3 (157.8-1032.8) | 325.6 (107.00-802.7) | 340.5 (109.8-871.7) | 514.5 (205.3-1116.5) | 509.2 (195.4-1143.0) | 733.0 (336.3-1522.7)   | 868.4 (398.5-1604.2) | 496.4 (169.9-1124.4)    | 509.1 (185.0-1174.5) |
| UACR, mg/g, n (%) <sup>c</sup>                        |                      |                      |                      |                      |                      |                     |                      |                      |                        |                      |                         |                      |
| <30                                                   | 39 (1.3)             | 40 (1.4)             | 53 (2.0)             | 50 (1.9)             | 28 (3.0)             | 20 (2.0)            | 69 (1.5)             | 68 (1.5)             | 2 (1.2)                | 1 (0.6)              | 49 (2.6)                | 41 (2.4)             |
| 30-<300                                               | 686 (23.2)           | 645 (22.0)           | 971 (36.9)           | 936 (36.2)           | 419 (45.2)           | 442 (44.6)          | 1422 (31.7)          | 1459 (31.7)          | 34 (20.9)              | 20 (12.5)            | 620 (33.1)              | 544 (31.3)           |
| 6□                                                    | 2231 (75.4)          | 2244 (76.6)          | 1611 (61.1)          | 1599 (61.8)          | 479 (51.7)           | 528 (53.3)          | 2989 (66.7)          | 3079 (66.8)          | 127 (77.9)             | 139 (86.9)           | 1205 (64.3)             | 1153 (66.3)          |
| BMI, kg/m <sup>2</sup> , mean (SD)                    | 32.1 ± 6.5           | 32.0 ± 6.3           | 31.1 ± 5.7           | 31.1 ± 5.7           | 29.5 ± 4.8           | 29.6 ± 5.1          | 30.9 ± 5.6           | 30.9 ± 5.6           | 34.0 ± 7.9             | 34.3 ± 7.9           | 32.0 ± 6.7              | 32.1 ± 6.5           |
| Current smoker, n (%)                                 | 657 (22.2)           | 626 (21.4)           | 351 (13.3)           | 335 (13.0)           | 57 (6.2)             | 67 (6.8)            | 874 (19.5)           | 856 (18.6)           | 17 (10.4)              | 18 (11.3)            | 174 (9.3)               | 154 (8.9)            |
| History of CV disease, present, n (%)                 | 1127 (38.1)          | 1061 (36.2)          | 1330 (50.5)          | 1337 (51.7)          | 522 (56.4)           | 558 (56.4)          | 2152 (48.0)          | 2222 (48.2)          | 36 (22.1)              | 20 (12.5)            | 791 (42.2)              | 714 (41.0)           |
| History of heart failure                              | 211 (7.1)            | 202 (6.9)            | 192 (7.3)            | 240 (9.3)            | 82 (8.9)             | 80 (8.1)            | 302 (6.7)            | 328 (7.1)            | 11 (6.7)               | 11 (6.9)             | 172 (9.2)               | 183 (10.5)           |

| n (%)                                           | Age                 |                  |                     |                  |                    |                 | Sex                 |                  |                        |                 |                         |                  |
|-------------------------------------------------|---------------------|------------------|---------------------|------------------|--------------------|-----------------|---------------------|------------------|------------------------|-----------------|-------------------------|------------------|
|                                                 | <65 Years           |                  | 65-74 Years         |                  | ≥75 Years          |                 | Male                |                  | Female (Premenopausal) |                 | Female (Postmenopausal) |                  |
|                                                 | Finerenone (n=2958) | Placebo (n=2931) | Finerenone (n=2635) | Placebo (n=2586) | Finerenone (n=926) | Placebo (n=990) | Finerenone (n=4481) | Placebo (n=4607) | Finerenone (n=163)     | Placebo (n=160) | Finerenone (n=1875)     | Placebo (n=1740) |
| History of atrial fibrillation/atrial flutter   | 144 (4.9)           | 122 (4.2)        | 280 (10.6)          | 267 (10.3)       | 144 (15.6)         | 149 (15.1)      | 439 (9.8)           | 428 (9.3)        | 0                      | 0               | 129 (6.9)               | 110 (6.3)        |
| Baseline medications, n (%) <sup>d</sup>        |                     |                  |                     |                  |                    |                 |                     |                  |                        |                 |                         |                  |
| RAS inhibitors (ACEis/ARBs)                     | 2951 (99.8)         | 2925 (99.8)      | 2631 (99.8)         | 2582 (99.8)      | 926 (100.0)        | 988 (99.8)      | 4473 (99.8)         | 4596 (99.8)      | 163 (100.0)            | 160 (100.0)     | 1872 (99.8)             | 1739 (>99.9)     |
| Beta-blockers                                   | 1311 (44.3)         | 1308 (44.6)      | 1419 (53.9)         | 1430 (55.3)      | 506 (54.6)         | 530 (53.5)      | 2237 (49.9)         | 2308 (50.1)      | 57 (35.0)              | 54 (33.8)       | 942 (50.2)              | 906 (52.1)       |
| Diuretics                                       | 1378 (46.6)         | 1412 (48.2)      | 1412 (53.6)         | 1401 (54.2)      | 535 (57.8)         | 572 (57.8)      | 2320 (51.8)         | 2386 (51.8)      | 67 (41.1)              | 70 (43.8)       | 938 (50.0)              | 929 (53.4)       |
| Statins                                         | 1993 (67.4)         | 2040 (69.6)      | 1975 (75.0)         | 1945 (75.2)      | 689 (74.4)         | 757 (76.5)      | 3291 (73.4)         | 3405 (73.9)      | 93 (57.1)              | 110 (68.8)      | 1273 (67.9)             | 1227 (70.5)      |
| Calcium channel blockers                        | 1564 (52.9)         | 1563 (53.3)      | 1544 (58.6)         | 1508 (58.3)      | 556 (60.0)         | 623 (62.9)      | 2554 (57.0)         | 2654 (57.6)      | 74 (45.4%)             | 75 (46.9)       | 1036 (55.3)             | 965 (55.5)       |
| Glucose-lowering medication, n (%) <sup>d</sup> | 2898 (98.0)         | 2881 (98.3)      | 2574 (97.7)         | 2537 (98.1)      | 882 (95.2)         | 948 (95.8)      | 4361 (97.3)         | 4499 (97.7)      | 161 (98.8)             | 156 (97.5)      | 1832 (97.7)             | 1711 (98.3)      |
| Insulin                                         | 1848 (62.5)         | 1789 (61.0)      | 1539 (58.4)         | 1481 (57.3)      | 479 (51.7)         | 494 (49.9)      | 2598 (58.0)         | 2605 (56.5)      | 94 (57.7)              | 99 (61.9)       | 1174 (62.6)             | 1060 (60.9)      |
| GLP-1RA                                         | 273 (9.2)           | 219 (7.5)        | 190 (7.2)           | 188 (7.3)        | 34 (3.7)           | 40 (4.0)        | 359 (8.0)           | 317 (6.9)        | 12 (7.4)               | 18 (11.3)       | 126 (6.7)               | 112 (6.4)        |
| SGLT-2i                                         | 251 (8.5)           | 266 (9.1)        | 149 (5.7)           | 140 (5.4)        | 38 (4.1)           | 33 (3.3)        | 331 (7.4)           | 340 (7.4)        | 19 (11.7)              | 17 (10.6)       | 88 (4.7)                | 82 (4.7)         |

ACEi = angiotensin-converting enzyme inhibitor; ARB = angiotensin receptor blocker; BMI = body mass index; CV = cardiovascular; eGFR = estimated glomerular filtration rate; GLP-1RA = glucagon-like peptide-1 receptor agonist; HbA1c = glycated hemoglobin; IQR = interquartile range; RAS = renin-angiotensin system; SD = standard deviation; SGLT-2i = sodium-glucose co-transporter-2 inhibitor; UACR = urine albumin-to-creatinine ratio.

Values are based on available data.

<sup>a</sup> Other: included American Indian/Alaska Native, Native Hawaiian/other Pacific, not reported, multiple.

<sup>b</sup> Missing (eGFR): <65 years, n=2; 65 to 74 years, n=1; postmenopausal female, n=3.

<sup>c</sup> Missing (UACR): <65 years, n=4; 65 to 74 years, n=1; male, n=2; postmenopausal female, n=3.

<sup>d</sup> Analysis allowed multiple drug groups for the same drug.

1  
2  
3  
4  
5  
6  
7  
8  
9  
10  
11  
12  
13  
14  
15  
16  
17  
18  
19  
20  
21  
22  
23  
24  
25  
26  
27  
28  
29  
30  
31  
32  
33  
34  
35  
36  
37  
38  
39  
40  
41  
42  
43  
44  
45  
46

**eFigure 1. Hazard ratio (finerenone vs. placebo) as a function of age modeled with cubic splines for CV composite outcome by age (A), spline for hazard ratio of CV composite outcomes by sex (B, C) and age distribution by sex (D).**

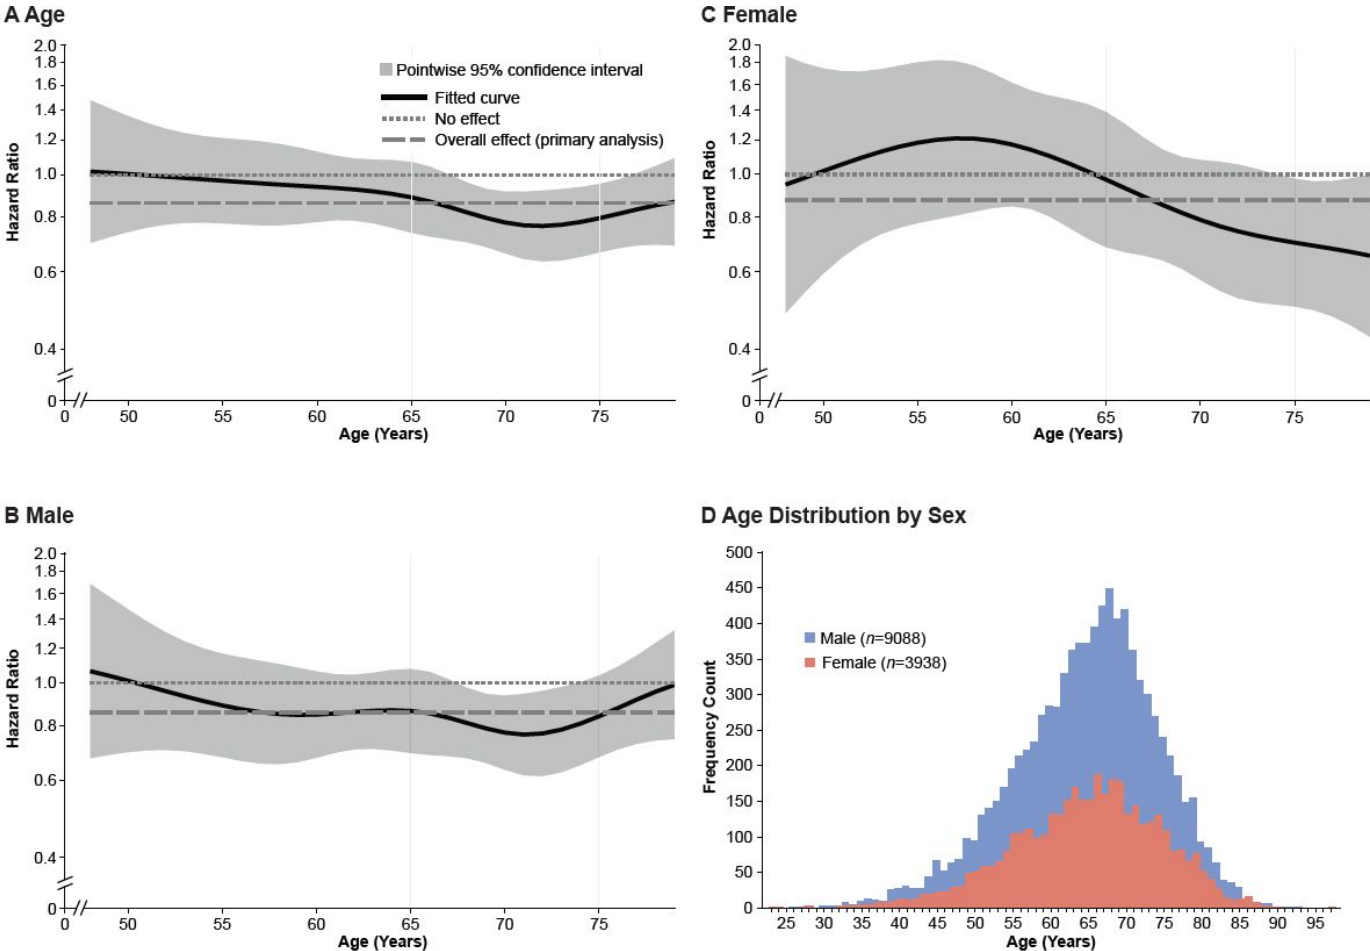

CV = cardiovascular.

5

eFigure 2. Hazard ratio (finerenone vs. placebo) as a function of age modeled with cubic splines for kidney composite outcome by age (A), spline for hazard ratio of kidney composite outcomes by sex (B, C) and age distribution by sex (D).

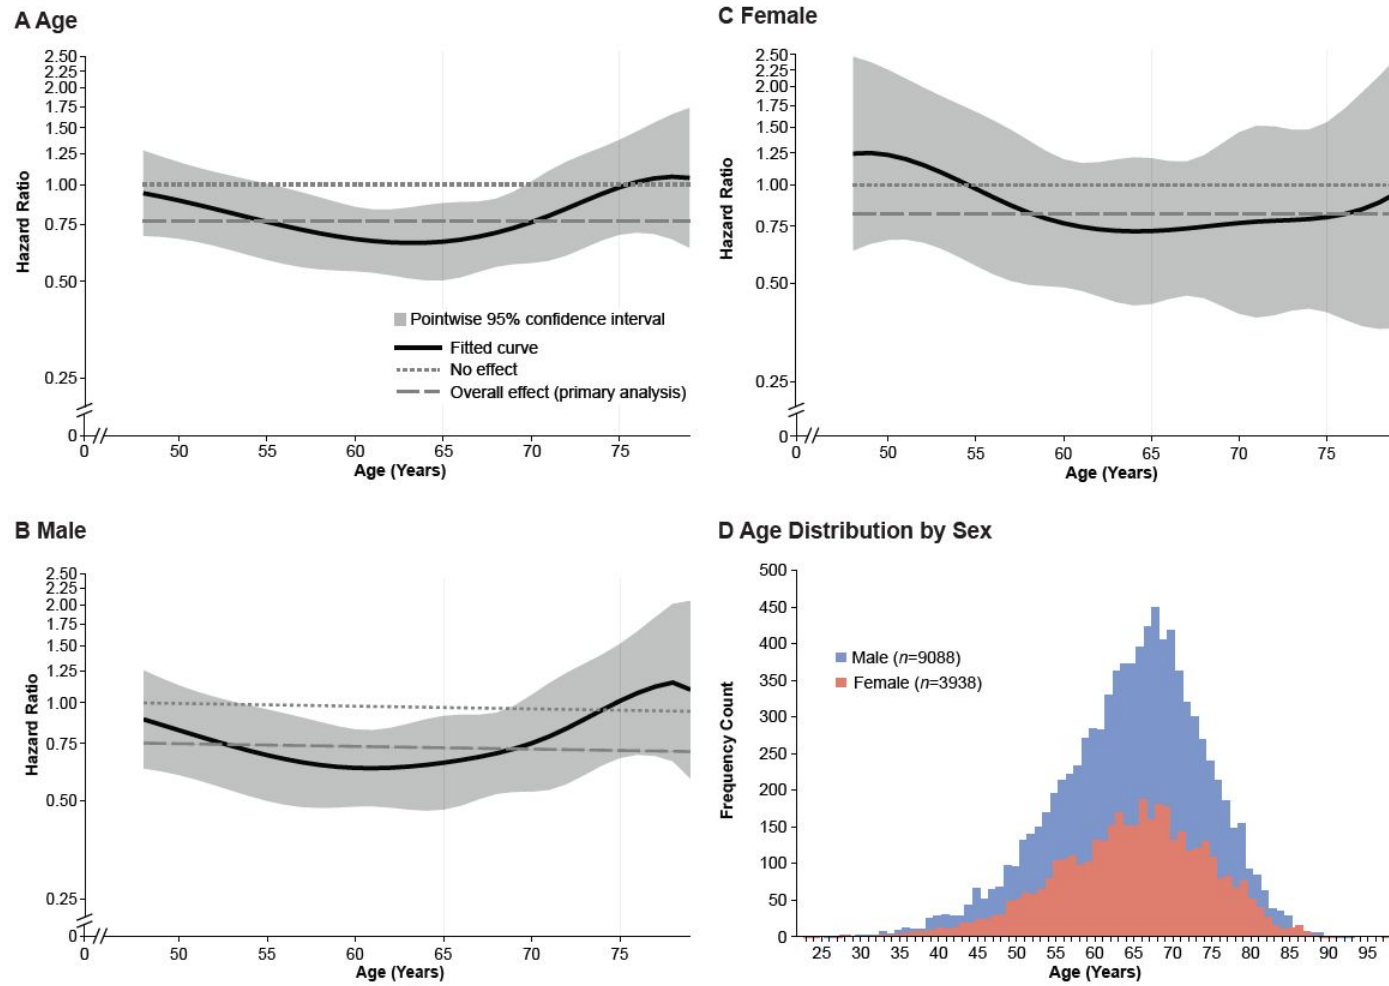

6

eFigure 3. LS mean change in eGFR from baseline, chronic, and total slopes over time by sex.

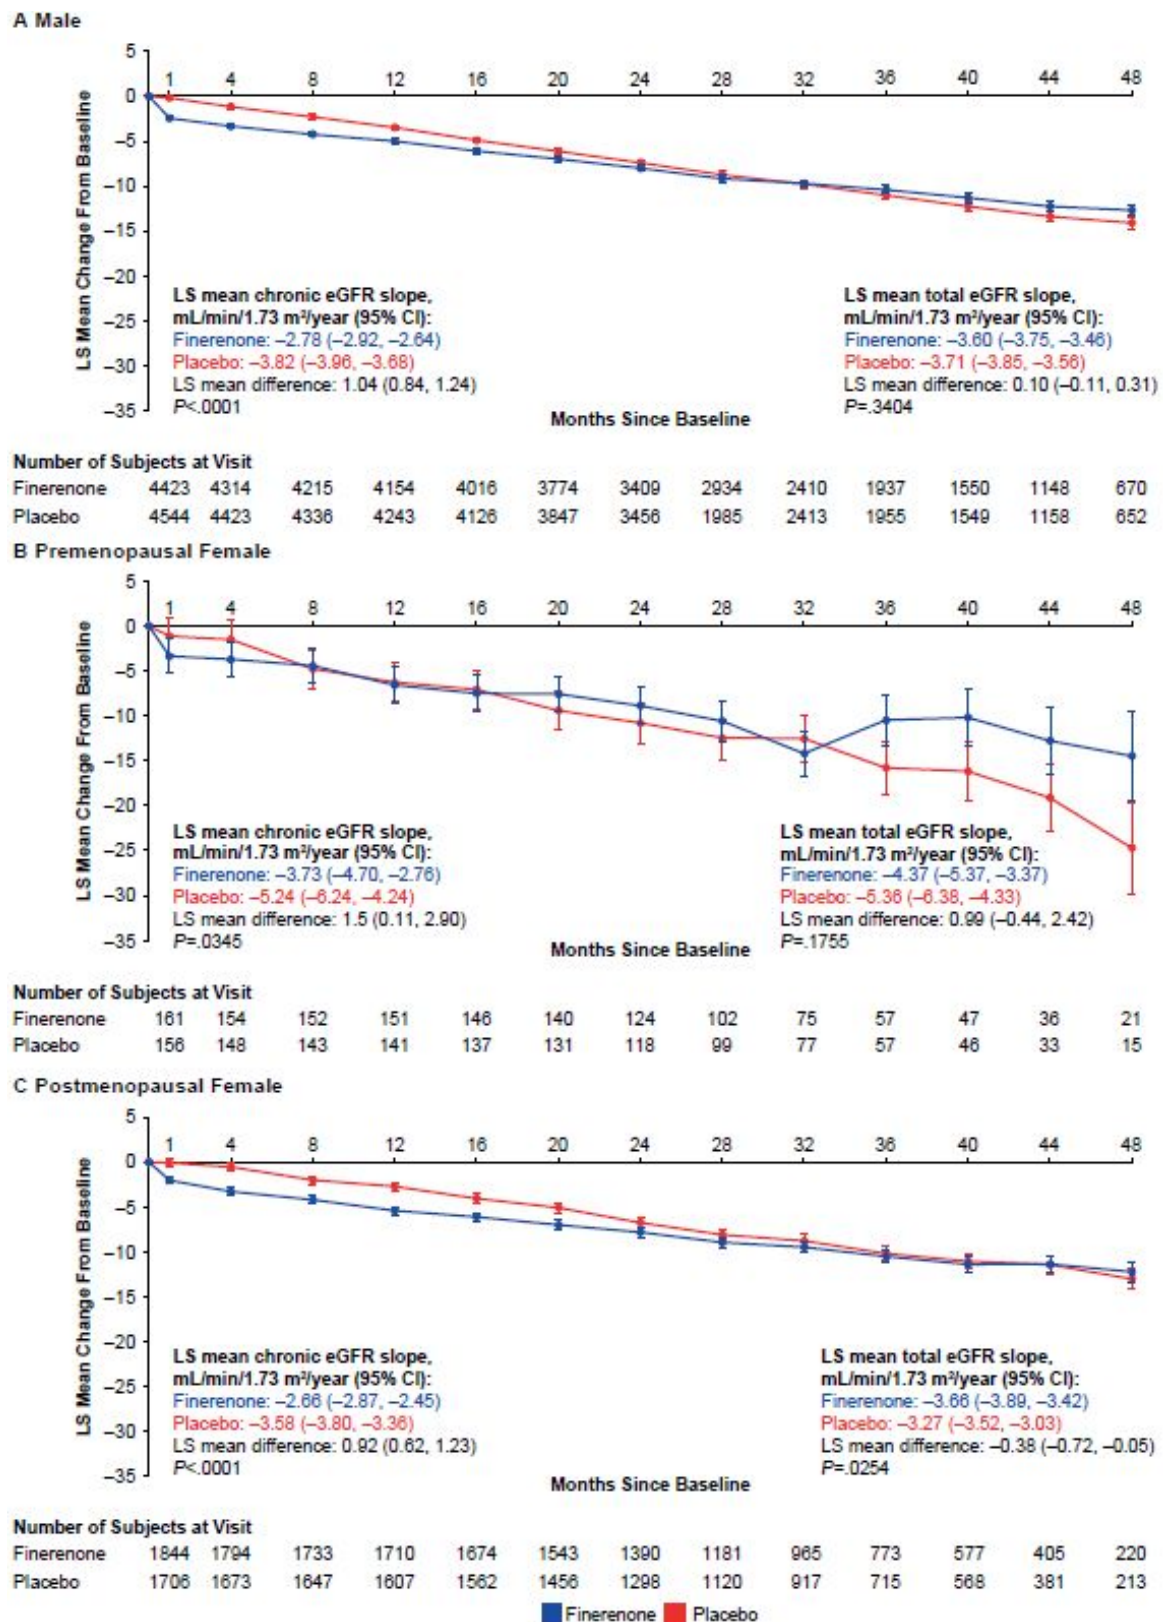

Chronic eGFR slope from month 4 to end-of-study visit.

CI = confidence interval; eGFR = estimated glomerular filtration rate; LS = least-squares.

eFigure 4. LS mean ratio to baseline UACR over time by age and sex.

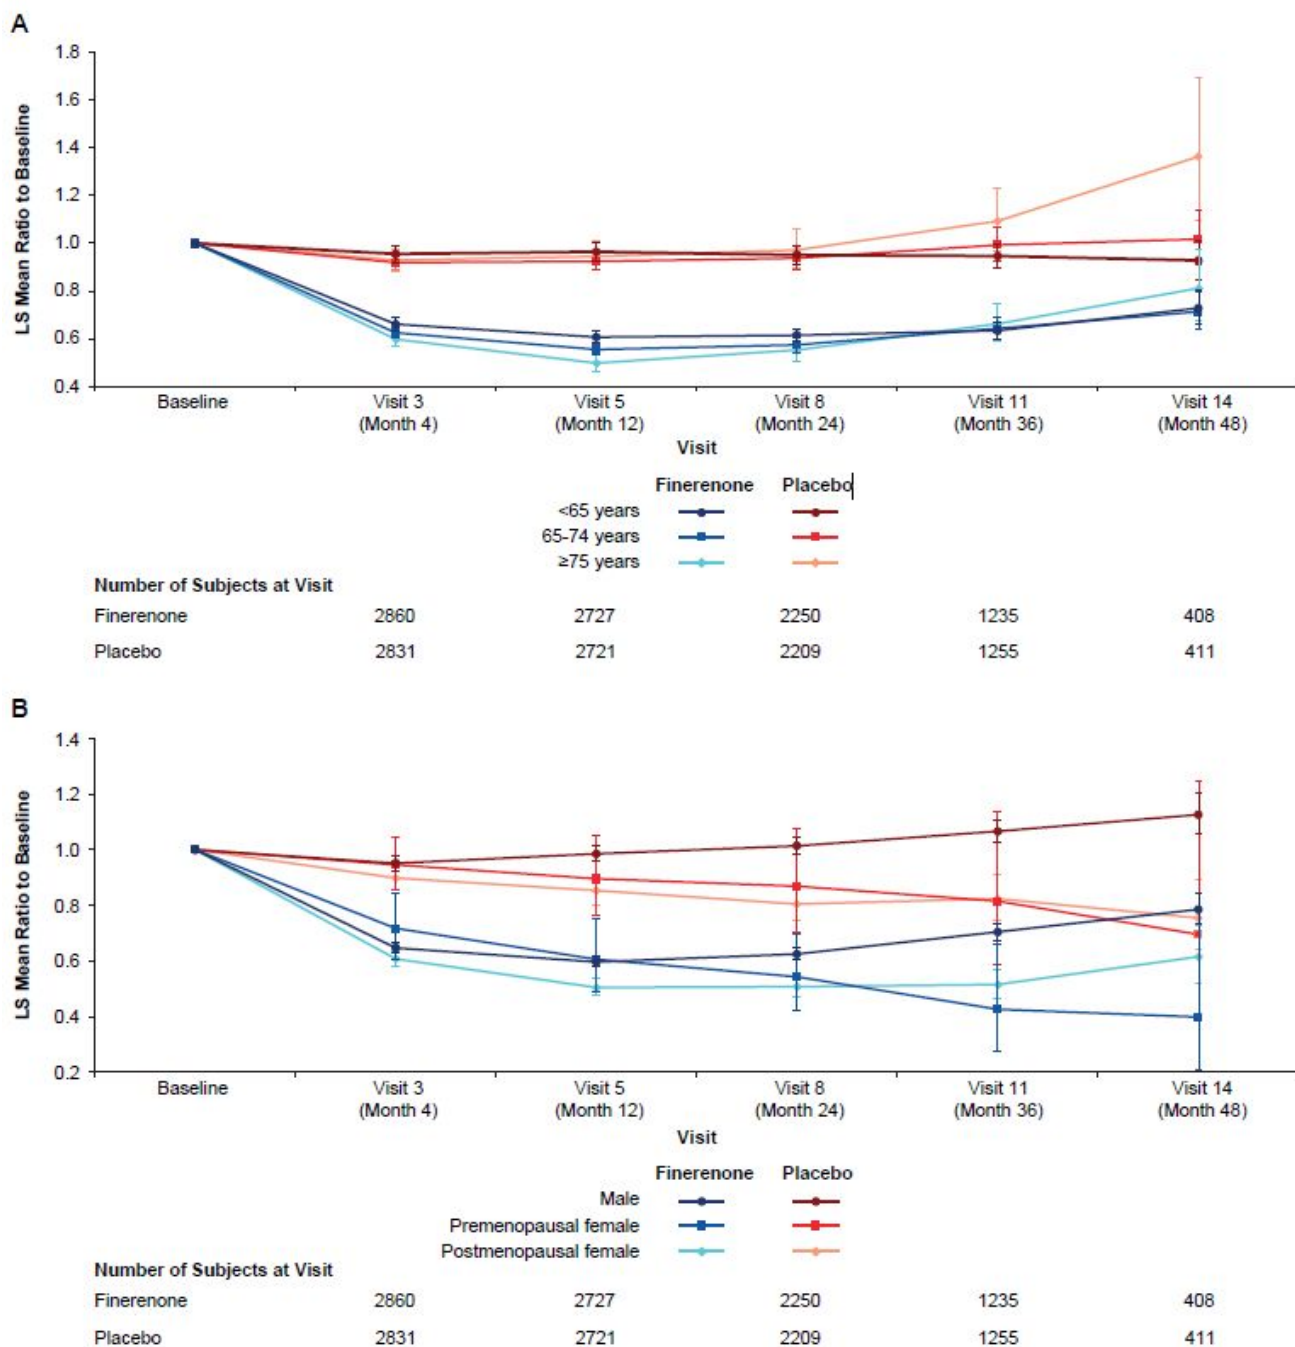

LS = least-squares; UACR = urine albumin-to-creatinine ratio.

eFigure 5. FIDELITY CONSORT diagram.

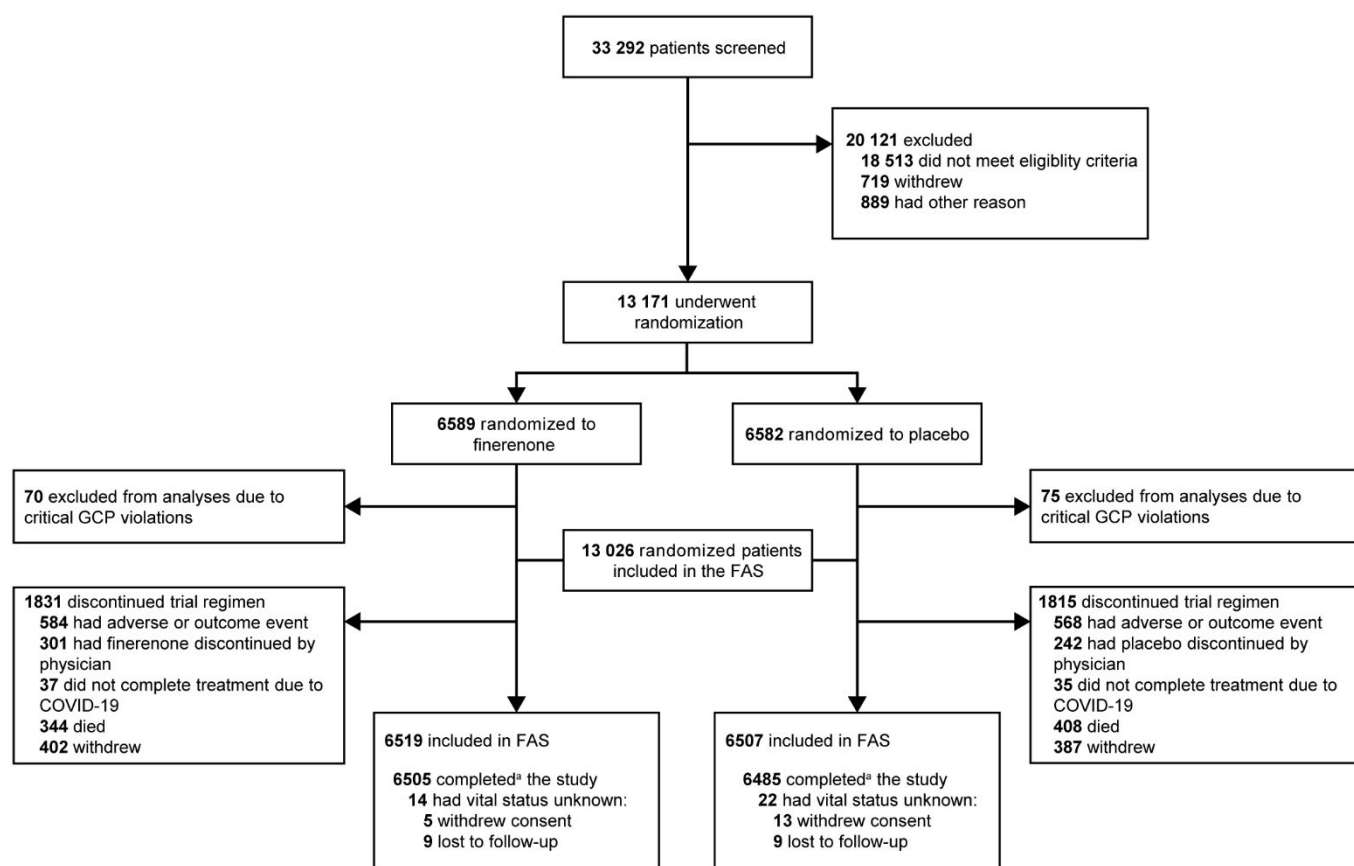

<sup>a</sup> The patient was considered as having completed the study if there was a contact with the patient after the end-of-study notification or if the patient died.  
FAS, full analysis set; GCP, Good Clinical Practice.

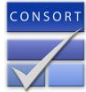

## CONSORT 2010 checklist of information to include when reporting a randomised trial\*

| Section/Topic             | Item No | Checklist item                                                                                                                        | Reported on page No                                    |
|---------------------------|---------|---------------------------------------------------------------------------------------------------------------------------------------|--------------------------------------------------------|
| <b>Title and abstract</b> |         |                                                                                                                                       |                                                        |
|                           | 1a      | Identification as a randomised trial in the title                                                                                     | 1 –<br>Secondary analysis of a previously reported RCT |
|                           | 1b      | Structured summary of trial design, methods, results, and conclusions (for specific guidance see CONSORT for abstracts)               | 3-4                                                    |
| <b>Introduction</b>       |         |                                                                                                                                       |                                                        |
| Background and objectives | 2a      | Scientific background and explanation of rationale                                                                                    | 5                                                      |
|                           | 2b      | Specific objectives or hypotheses                                                                                                     | 6                                                      |
| <b>Methods</b>            |         |                                                                                                                                       |                                                        |
| Trial design              | 3a      | Description of trial design (such as parallel, factorial) including allocation ratio                                                  | 6-7                                                    |
|                           | 3b      | Important changes to methods after trial commencement (such as eligibility criteria), with reasons                                    | 6                                                      |
| Participants              | 4a      | Eligibility criteria for participants                                                                                                 | 6                                                      |
|                           | 4b      | Settings and locations where the data were collected                                                                                  | Reported previously                                    |
| Interventions             | 5       | The interventions for each group with sufficient details to allow replication, including how and when they were actually administered | 7                                                      |
| Outcomes                  | 6a      | Completely defined pre-specified primary and secondary outcome measures, including how and when they were assessed                    | 7                                                      |
|                           | 6b      | Any changes to trial outcomes after the trial commenced, with reasons                                                                 | N/A                                                    |
| Sample size               | 7a      | How sample size was determined                                                                                                        | Reported previously                                    |
|                           | 7b      | When applicable, explanation of any interim analyses and stopping guidelines                                                          | Reported previously                                    |
| Randomisation:            |         |                                                                                                                                       |                                                        |
| Sequence                  | 8a      | Method used to generate the random allocation sequence                                                                                | Reported                                               |



|    |                     |     |                                                                                                                         |              |
|----|---------------------|-----|-------------------------------------------------------------------------------------------------------------------------|--------------|
| 1  | generation          |     |                                                                                                                         | previously   |
| 2  |                     | 8b  | Type of randomisation; details of any restriction (such as blocking and block size)                                     | Reported     |
| 3  |                     |     |                                                                                                                         | previously   |
| 4  | Allocation          | 9   | Mechanism used to implement the random allocation sequence (such as sequentially numbered containers),                  | Reported     |
| 5  | concealment         |     | describing any steps taken to conceal the sequence until interventions were assigned                                    | previously   |
| 6  | mechanism           |     |                                                                                                                         |              |
| 7  | Implementation      | 10  | Who generated the random allocation sequence, who enrolled participants, and who assigned participants to interventions | Reported     |
| 8  |                     |     |                                                                                                                         | previously   |
| 9  |                     |     |                                                                                                                         |              |
| 10 | Blinding            | 11a | If done, who was blinded after assignment to interventions (for example, participants, care providers, those            | Reported     |
| 11 |                     |     | assessing outcomes) and how                                                                                             | previously   |
| 12 |                     | 11b | If relevant, description of the similarity of interventions                                                             | Reported     |
| 13 |                     |     |                                                                                                                         | previously   |
| 14 |                     |     |                                                                                                                         |              |
| 15 | Statistical methods | 12a | Statistical methods used to compare groups for primary and secondary outcomes                                           | 7-8          |
| 16 |                     | 12b | Methods for additional analyses, such as subgroup analyses and adjusted analyses                                        | 7-8          |
| 17 |                     |     |                                                                                                                         |              |
| 18 | <b>Results</b>      |     |                                                                                                                         |              |
| 19 | Participant flow (a | 13a | For each group, the numbers of participants who were randomly assigned, received intended treatment, and                | 8-9; Table 1 |
| 20 | diagram is strongly |     | were analysed for the primary outcome                                                                                   |              |
| 21 | recommended)        | 13b | For each group, losses and exclusions after randomisation, together with reasons                                        | eFigure 5    |
| 22 | Recruitment         | 14a | Dates defining the periods of recruitment and follow-up                                                                 | Reported     |
| 23 |                     |     |                                                                                                                         | previously   |
| 24 |                     | 14b | Why the trial ended or was stopped                                                                                      | Reported     |
| 25 |                     |     |                                                                                                                         | previously   |
| 26 |                     |     |                                                                                                                         |              |
| 27 | Baseline data       | 15  | A table showing baseline demographic and clinical characteristics for each group                                        | Table 1      |
| 28 | Numbers analysed    | 16  | For each group, number of participants (denominator) included in each analysis and whether the analysis was             | 8-9; Table 1 |
| 29 |                     |     | by original assigned groups                                                                                             |              |
| 30 | Outcomes and        | 17a | For each primary and secondary outcome, results for each group, and the estimated effect size and its                   | 9-12         |
| 31 | estimation          |     | precision (such as 95% confidence interval)                                                                             | Figures 1-2  |
| 32 |                     | 17b | For binary outcomes, presentation of both absolute and relative effect sizes is recommended                             | N/A          |
| 33 | Ancillary analyses  | 18  | Results of any other analyses performed, including subgroup analyses and adjusted analyses, distinguishing              | eFigures 1-4 |
| 34 |                     |     | pre-specified from exploratory                                                                                          |              |
| 35 | Harms               | 19  | All important harms or unintended effects in each group (for specific guidance see CONSORT for harms)                   | Table 2      |
| 36 |                     |     |                                                                                                                         |              |
| 37 |                     |     |                                                                                                                         |              |
| 38 |                     |     |                                                                                                                         |              |
| 39 |                     |     |                                                                                                                         |              |
| 40 |                     |     |                                                                                                                         |              |
| 41 |                     |     |                                                                                                                         |              |
| 42 | <b>Discussion</b>   |     |                                                                                                                         |              |

|    |                          |    |                                                                                                                  |               |
|----|--------------------------|----|------------------------------------------------------------------------------------------------------------------|---------------|
| 1  | Limitations              | 20 | Trial limitations, addressing sources of potential bias, imprecision, and, if relevant, multiplicity of analyses | 14            |
| 2  | Generalisability         | 21 | Generalisability (external validity, applicability) of the trial findings                                        | Reported      |
| 3  |                          |    |                                                                                                                  | previously    |
| 4  | Interpretation           | 22 | Interpretation consistent with results, balancing benefits and harms, and considering other relevant evidence    | 12-15         |
| 5  |                          |    |                                                                                                                  |               |
| 6  | <b>Other information</b> |    |                                                                                                                  |               |
| 7  | Registration             | 23 | Registration number and name of trial registry                                                                   | 6             |
| 8  | Protocol                 | 24 | Where the full trial protocol can be accessed, if available                                                      | Primary       |
| 9  |                          |    |                                                                                                                  | publications  |
| 10 |                          |    |                                                                                                                  | with full     |
| 11 |                          |    |                                                                                                                  | protocols are |
| 12 |                          |    |                                                                                                                  | cited (6)     |
| 13 |                          |    |                                                                                                                  |               |
| 14 | Funding                  | 25 | Sources of funding and other support (such as supply of drugs), role of funders                                  | 16-17         |
| 15 |                          |    |                                                                                                                  |               |

17 \*We strongly recommend reading this statement in conjunction with the CONSORT 2010 Explanation and Elaboration for important clarifications on all the items. If relevant, we also  
 18 recommend reading CONSORT extensions for cluster randomised trials, non-inferiority and equivalence trials, non-pharmacological treatments, herbal interventions, and pragmatic trials.  
 19 Additional extensions are forthcoming: for those and for up to date references relevant to this checklist, see [www.consort-statement.org](http://www.consort-statement.org).  
 20  
 21  
 22  
 23  
 24  
 25  
 26  
 27  
 28  
 29  
 30  
 31  
 32  
 33  
 34  
 35  
 36  
 37  
 38  
 39  
 40  
 41  
 42

# BMJ Open

## Finerenone Cardiovascular and Kidney Outcomes by Age and Sex: FIDELITY Post Hoc Analysis of Two Phase 3, Multicenter, Double-Blind Trials

|                                 |                                                                                                                                                                                                                                                                                                                                                                                                                                                                                                                                                                                                                                                                                                                                                                                                                                                                                                                                                                                                                                                                      |
|---------------------------------|----------------------------------------------------------------------------------------------------------------------------------------------------------------------------------------------------------------------------------------------------------------------------------------------------------------------------------------------------------------------------------------------------------------------------------------------------------------------------------------------------------------------------------------------------------------------------------------------------------------------------------------------------------------------------------------------------------------------------------------------------------------------------------------------------------------------------------------------------------------------------------------------------------------------------------------------------------------------------------------------------------------------------------------------------------------------|
| Journal:                        | <i>BMJ Open</i>                                                                                                                                                                                                                                                                                                                                                                                                                                                                                                                                                                                                                                                                                                                                                                                                                                                                                                                                                                                                                                                      |
| Manuscript ID                   | bmjopen-2023-076444.R1                                                                                                                                                                                                                                                                                                                                                                                                                                                                                                                                                                                                                                                                                                                                                                                                                                                                                                                                                                                                                                               |
| Article Type:                   | Original research                                                                                                                                                                                                                                                                                                                                                                                                                                                                                                                                                                                                                                                                                                                                                                                                                                                                                                                                                                                                                                                    |
| Date Submitted by the Author:   | 05-Jan-2024                                                                                                                                                                                                                                                                                                                                                                                                                                                                                                                                                                                                                                                                                                                                                                                                                                                                                                                                                                                                                                                          |
| Complete List of Authors:       | Bansal, Shweta ; University of Texas Health San Antonio, Department of Medicine<br>Canziani, M. E. F.; Univ Fed Sao Paulo<br>Birne, Rita; Centro Hospitalar Lisboa Ocidental, Department of Nephrology; University of Lisbon, Nova Medical School<br>Anker, Stefan; Charité Universitätsmedizin, Department of Cardiology (CVK) of German Heart Center Charité; Institute of Health Center for Regenerative Therapies (BCRT)<br>Bakris, George; University of Chicago, Hypertension Center<br>Filippatos, Gerasimos; National and Kapodistrian University of Athens<br>Rossing, Peter; Steno Diabetes Center AS; University of Copenhagen, Department of Clinical Medicine<br>Ruilope, Luis M ; Institute of Research imas12, Cardiorenal Translational Laboratory and Hypertension Unit; Hospital Universitario 12 de Octubre, CIBER-CV<br>Farjat, Alfredo; Bayer plc<br>Kolkhof, Peter; Cardiovascular Precision Medicines Bayer AG<br>Lage, Andrea; Bayer SA<br>Brinker, Meike; Cardiology and Nephrology Clinical Development<br>Pitt, B; University of Michigan |
| <b>Primary Subject Heading</b>: | Diabetes and endocrinology                                                                                                                                                                                                                                                                                                                                                                                                                                                                                                                                                                                                                                                                                                                                                                                                                                                                                                                                                                                                                                           |
| Secondary Subject Heading:      | Cardiovascular medicine                                                                                                                                                                                                                                                                                                                                                                                                                                                                                                                                                                                                                                                                                                                                                                                                                                                                                                                                                                                                                                              |
| Keywords:                       | Risk Factors, Diabetic nephropathy & vascular disease < DIABETES & ENDOCRINOLOGY, DIABETES & ENDOCRINOLOGY, Cardiovascular Disease                                                                                                                                                                                                                                                                                                                                                                                                                                                                                                                                                                                                                                                                                                                                                                                                                                                                                                                                   |
|                                 |                                                                                                                                                                                                                                                                                                                                                                                                                                                                                                                                                                                                                                                                                                                                                                                                                                                                                                                                                                                                                                                                      |

SCHOLARONE™  
Manuscripts



I, the Submitting Author has the right to grant and does grant on behalf of all authors of the Work (as defined in the below author licence), an exclusive licence and/or a non-exclusive licence for contributions from authors who are: i) UK Crown employees; ii) where BMJ has agreed a CC-BY licence shall apply, and/or iii) in accordance with the terms applicable for US Federal Government officers or employees acting as part of their official duties; on a worldwide, perpetual, irrevocable, royalty-free basis to BMJ Publishing Group Ltd ("BMJ") its licensees and where the relevant Journal is co-owned by BMJ to the co-owners of the Journal, to publish the Work in this journal and any other BMJ products and to exploit all rights, as set out in our [licence](#).

The Submitting Author accepts and understands that any supply made under these terms is made by BMJ to the Submitting Author unless you are acting as an employee on behalf of your employer or a postgraduate student of an affiliated institution which is paying any applicable article publishing charge ("APC") for Open Access articles. Where the Submitting Author wishes to make the Work available on an Open Access basis (and intends to pay the relevant APC), the terms of reuse of such Open Access shall be governed by a Creative Commons licence – details of these licences and which [Creative Commons](#) licence will apply to this Work are set out in our licence referred to above.

Other than as permitted in any relevant BMJ Author's Self Archiving Policies, I confirm this Work has not been accepted for publication elsewhere, is not being considered for publication elsewhere and does not duplicate material already published. I confirm all authors consent to publication of this Work and authorise the granting of this licence.

# Finerenone Cardiovascular and Kidney Outcomes by Age and Sex: FIDELITY Post Hoc Analysis of Two Phase 3, Multicenter, Double-Blind Trials

## Author(s)

Shweta Bansal, MD,<sup>1</sup> Maria E.F. Canziani, MD,<sup>2</sup> Rita Birne, MD,<sup>3,4</sup> Stefan D. Anker, MD, PhD,<sup>5</sup> George L. Bakris, MD,<sup>6</sup> Gerasimos Filippatos, MD,<sup>7</sup> Peter Rossing, MD, DMSc,<sup>8,9</sup> Luis M. Ruilope, MD,<sup>10-12</sup> Alfredo E. Farjat, PhD,<sup>13</sup> Peter Kolkhof, PhD,<sup>14</sup> Andrea Lage, MD,<sup>15</sup> Meike Brinker, MD,<sup>16</sup> Bertram Pitt, MD<sup>17</sup>

## Institution(s)

<sup>1</sup>Division of Nephrology, Department of Medicine, University of Texas Health San Antonio, San Antonio, Texas, USA

<sup>2</sup>Nephrology Division, Federal University of São Paulo, São Paulo, Brazil

<sup>3</sup>Department of Nephrology, Centro Hospitalar Lisboa Ocidental, Lisbon, Portugal

<sup>4</sup>Nova Medical School, University of Lisbon, Lisbon, Portugal

<sup>5</sup>Department of Cardiology (CVK) of German Heart Center Charité; Institute of Health Center for Regenerative Therapies (BCRT), German Centre for Cardiovascular Research (DZHK) partner Site Berlin, Charité Universitätsmedizin, Berlin, Germany

<sup>6</sup>Department of Medicine, University of Chicago Medicine, Chicago, Illinois, USA

<sup>7</sup>National and Kapodistrian University of Athens, School of Medicine, Department of Cardiology, Attikon University Hospital, Athens, Greece

<sup>8</sup>Steno Diabetes Center Copenhagen, Gentofte, Denmark

<sup>9</sup>Department of Clinical Medicine, University of Copenhagen, Copenhagen, Denmark

<sup>10</sup>Cardiorenal Translational Laboratory and Hypertension Unit, Institute of Research imas12, Madrid, Spain

<sup>11</sup>CIBER-CV, Hospital Universitario 12 de Octubre, Madrid, Spain

1  
2  
3 27 <sup>12</sup>Faculty of Sport Sciences, European University of Madrid, Madrid, Spain  
4  
5 28 <sup>13</sup>Research and Development, Clinical Data Sciences and Analytics, Bayer PLC, Reading,  
6  
7 29 UK  
8  
9 30 <sup>14</sup>Research and Early Development, Cardiovascular Precision Medicines, Bayer AG,  
10  
11 31 Wuppertal, Germany  
12  
13 32 <sup>15</sup>Cardiology and Nephrology Clinical Development, Bayer SA, São Paulo, Brazil  
14  
15 33 <sup>16</sup>Cardiology and Nephrology Clinical Development, Bayer AG, Wuppertal, Germany  
16  
17 34 <sup>17</sup>Department of Medicine, University of Michigan School of Medicine, Ann Arbor, Michigan,  
18  
19 35 USA  
20  
21  
22  
23

24 37 **Contact information for corresponding author:**

25  
26 38 Name: Shweta Bansal, MD, FASN  
27  
28 39 Address: Department of Medicine, Division of Nephrology, Joe R. & Teresa Lozano Long  
29  
30 40 School of Medicine, UT Health, San Antonio, TX, USA  
31  
32 41 7703 Floyd Curl Drive, MSC 7882  
33  
34 42 San Antonio, TX-78229, USA  
35  
36 43 Phone no: 210-422-0438  
37  
38 44 Fax no: 210-567-4712  
39  
40 45 Email: bansals3@uthscsa.edu  
41  
42  
43  
44

45 47 **Journal:** *BMJ Open*

46  
47 48 **Running head:** Finerenone: Cardiovascular and Kidney Outcomes by Age and Sex

48  
49 49 **Key words:** chronic kidney disease, type 2 diabetes, cardiovascular, finerenone, risk factors

50  
51 50 **Word count:** 3050 of 4000

52  
53 51 **No. of figures and tables:** 4 of 5 tables/figures

54  
55 52 **No. of references:** 45  
56  
57  
58  
59  
60

## 53 ABSTRACT

54 **Objectives:** To evaluate the efficacy and safety of finerenone, a selective, nonsteroidal  
55 mineralocorticoid receptor antagonist, on cardiovascular and kidney outcomes by age and/or  
56 sex.

57 **Design:** FIDELITY post hoc analysis; 3 years median follow-up.

58 **Setting:** FIDELITY, a prespecified analysis of the multicenter, double-blind FIDELIO-DKD  
59 and FIGARO-DKD trials.

60 **Participants:** Adults with type 2 diabetes and chronic kidney disease receiving optimized  
61 renin–angiotensin system inhibitor treatment (N=13 026 patients).

62 **Interventions:** Randomized 1:1 to finerenone or placebo.

63 **Primary and secondary outcome measures:** Cardiovascular (cardiovascular death,  
64 nonfatal myocardial infarction, nonfatal stroke, or hospitalization for heart failure [HHF]) and  
65 kidney (kidney failure, sustained  $\geq 57\%$  estimated glomerular filtration rate decline, or renal  
66 death) composite outcomes.

67 **Results:** Mean age was 64.8 years; 45.2%, 40.1%, and 14.7% were aged  $<65$ , 65–74, and  
68  $\geq 75$  years, respectively; 69.8% were male. Cardiovascular benefits of finerenone versus  
69 placebo were consistent across age (hazard ratio 0.94 [ $<65$  years], 0.84 [65–74 years], 0.80  
70 [ $\geq 75$  years];  $P_{\text{interaction}}=.42$ ) and sex categories (hazard ratio 0.86 [male], 0.89 [premenopausal  
71 female], 0.87 [postmenopausal female];  $P_{\text{interaction}}=.99$ ); effects on HHF reduction were not  
72 modified by age ( $P_{\text{interaction}}=.70$ ) but appeared more pronounced in males ( $P_{\text{interaction}}=.02$ ).  
73 Kidney events were reduced with finerenone versus placebo in patients aged  $<65$  and 65–74  
74 but not  $\geq 75$ ; no heterogeneity in treatment effect was observed ( $P_{\text{interaction}}=.51$ ). In sex  
75 subgroups, finerenone consistently reduced kidney events ( $P_{\text{interaction}}=.85$ ). Finerenone  
76 reduced albuminuria and estimated glomerular filtration rate decline regardless of age and  
77 sex. Hyperkalemia increased with finerenone, but discontinuation rates were  $<3\%$  across  
78 subgroups. Gynecomastia in males was uncommon across age subgroups and identical  
79 between treatment groups.

1  
2  
3 80 **Conclusions:** Finerenone improved cardiovascular and kidney composite outcomes with no  
4  
5 81 significant heterogeneity between age and sex subgroups; however, the effect on HHF  
6  
7 82 appeared more pronounced in males. Finerenone demonstrated a similar safety profile  
8  
9 83 across age and sex subgroups.  
10

11 84 **Registration:** FIDELIO-DKD (NCT02540993); FIGARO-DKD (NCT02545049)  
12  
13  
14 85

15 86 **Abstract word count:** 300 of 300  
16  
17

## 18 19 87 **STRENGTHS AND LIMITATIONS OF THIS STUDY**

- 20  
21 88 • An advantage of this study was the use of combined individual-level data from the  
22  
23 89 FIDELIO-DKD and FIGARO-DKD phase 3 clinical trials, resulting in a large number of  
24  
25 90 patients included in the full analysis set  
26  
27 91 • This study did not use predefined age categories, as it was a post hoc analysis, which  
28  
29 92 may have resulted in some of the tests performed being underpowered  
30  
31 93 • Limitations present in FIDELITY are present in this analysis, such as the small proportion  
32  
33 94 of Black patients and exclusion of patients with nonalbuminuric CKD  
34  
35  
36 95



## 96 INTRODUCTION

97 In patients with diabetes, the risk of cardiovascular (CV) disease and chronic kidney disease  
98 (CKD) increases with age.[1] Likewise, vascular complications are affected by sex and are  
99 increased in females more than males in patients with diabetes.[2]

100  
101 Among individuals aged 50–75 years without baseline diabetes, CKD, or CV disease, males  
102 have a steeper decline in glomerular filtration rate (GFR) than females.[3] However, reported  
103 effects of sex on risk of incidental and progressive CKD in patients with type 2 diabetes  
104 (T2D) have been inconsistent.[4-6] In trials including patients with CKD, female  
105 representation varies (25–40%),[7-11] whereas in real-world studies, females make up over  
106 half of patients.[12,13]

107  
108 Overactivation of the mineralocorticoid receptor (MR) is associated with CV and kidney  
109 diseases.[14,15] In epithelial cells, the 11  $\beta$ -hydroxysteroid dehydrogenase type 2 (11 $\beta$ -  
110 HSD2) enzyme prevents inappropriate MR activation by cortisol.[16-18] The activity of 11 $\beta$ -  
111 HSD2 decreases with age, resulting in MR overactivation in the elderly despite low  
112 circulating aldosterone levels.[16-18] Sex also influences 11 $\beta$ -HSD2 activity, particularly in  
113 patients with hypertension, where 11 $\beta$ -HSD2 activity is reduced in males versus females.[16]  
114 The MR is also expressed in nonepithelial cells, including endothelial cells, vascular smooth  
115 muscle cells, adipocytes, and immune cells.[17] In many of these, the MR may be activated  
116 by cortisol because of a lack of protection by 11 $\beta$ -HSD2.[19,20]

117  
118 Despite management with recommended treatments for CKD in T2D, 10–13% of patients  
119 experience CKD progression or kidney failure and are at high risk of CV events, including CV  
120 death within 2–3 years following treatment initiation.[10,21,22] Finerenone, a selective,  
121 nonsteroidal MR antagonist (MRA), reduced the risk of CKD progression and CV outcomes  
122 compared with placebo in patients with CKD and T2D in FIDELITY (The Finerenone in

1  
2  
3 123 chronic kidney disease and type 2 diabetes: Combined FIDELIO-DKD and FIGARO-DKD  
4  
5 124 Trial programme analysis), a prespecified pooled analysis of the FIDELIO-DKD (Finerenone  
6  
7 125 in reducing kidney failure and disease progression in Diabetic Kidney Disease;  
8  
9 126 NCT02540993) and FIGARO-DKD (Finerenone in reducing cardiovascular mortality and  
10  
11 127 morbidity in Diabetic Kidney Disease; NCT02545049) phase 3 trials.[21] However, the  
12  
13 128 influence of age and sex on outcomes with finerenone is unknown. This post hoc analysis  
14  
15 129 evaluated whether the cardiovascular and kidney benefits and safety profile of finerenone  
16  
17 130 observed in FIDELITY are consistent in patients with CKD and T2D across ages and in both  
18  
19 131 sexes.  
20  
21  
22

## 23 132 **METHODS**

### 27 133 **Study design and patients**

29 134 FIDELITY combined individual patient-level data from the FIDELIO-DKD and FIGARO-DKD  
30  
31 135 phase 3 clinical trials. The study design, procedures, and outcomes for the trials have been  
32  
33 136 previously published.[23-25] The FIDELIO-DKD and FIGARO-DKD trials were conducted in  
34  
35 137 accordance with the principles of the Declaration of Helsinki. Protocol approvals were  
36  
37 138 obtained from local regulatory authorities and ethics committees. Written informed consent  
38  
39 139 was provided by all participants. These studies were reported following the Consolidated  
40  
41 140 Standards of Reporting Trials (CONSORT) reporting guideline.  
42  
43  
44 141

46 142 Eligible patients were aged  $\geq 18$  years with CKD and T2D, receiving maximum tolerated  
47  
48 143 renin-angiotensin system inhibitor, and with serum potassium levels  $\leq 4.8$  mmol/L at  
49  
50 144 screening. Patients had either a urine albumin-to-creatinine ratio (UACR)  $\geq 30$ – $< 300$  mg/g  
51  
52 145 and an estimated GFR (eGFR)  $\geq 25$ – $\leq 90$  mL/min/1.73 m<sup>2</sup>, or UACR  $\geq 300$ – $\leq 5000$  mg/g and  
53  
54 146 eGFR  $\geq 25$  mL/min/1.73 m<sup>2</sup>. Patients with symptomatic heart failure (HF) with reduced  
55  
56 147 ejection fraction were excluded because this implies an indication for a steroidal MRA.  
57  
58  
59 148  
60

1  
2  
3 149 Standard-of-care therapy with a renin–angiotensin system inhibitor was optimized during the  
4  
5 150 run-in period. Patients were randomly assigned (1:1) to receive finerenone at titrated doses  
6  
7 151 (10 or 20 mg) once-daily oral treatment or matching placebo.  
8  
9

## 10 152 **Key outcomes**

11  
12  
13 153 Efficacy outcomes included a CV composite outcome of CV death, nonfatal myocardial  
14  
15 154 infarction, nonfatal stroke, or hospitalization for HF (HHF), and a kidney composite outcome  
16  
17 155 of kidney failure, sustained  $\geq 57\%$  eGFR decline, or renal death. Additional outcomes  
18  
19 156 included HHF and change in UACR and eGFR over time.  
20

21 157  
22  
23 158 Safety outcomes included incidence of investigator-reported adverse events (AEs), including  
24  
25 159 those leading to treatment discontinuation, central laboratory assessment of serum  
26  
27 160 potassium levels  $>5.5$  and  $>6.0$  mmol/L, and other safety events of interest, such as  
28  
29 161 hypotension, hyperkalemia, and gynecomastia in males.  
30

31 162  
32  
33  
34 163 Outcomes were analyzed according to patient age at baseline ( $<65$ ,  $65$ – $75$ ,  $\geq 75$  years) and  
35  
36 164 sex. Females were categorized as either pre- or postmenopausal if they were aged  $<51.4$  or  
37  
38 165  $\geq 51.4$  years at baseline, respectively (based on the median age of menopause onset from  
39  
40 166 the Massachusetts Women's Health Study).[26]  
41

## 42 43 167 **Statistical analysis**

44  
45  
46 168 Statistical analyses were performed as described in FIDELITY.[23] The full analysis set  
47  
48 169 comprised all randomized patients (except those with critical Good Clinical Practice  
49  
50 170 violations, who were prospectively excluded). Safety analyses were performed in the safety  
51  
52 171 analysis set (randomized patients without critical Good Clinical Practice violations who took  
53  
54 172  $>1$  dose of study drug). The analyses were prespecified exploratory evaluations of outcomes  
55  
56 173 according to age and sex, with events reported from randomization up to the end-of-study  
57  
58 174 visit. Stratified Cox proportional hazards models,[27,28] including stratification factors:  
59  
60

1  
2  
3 175 geographic region, eGFR and albuminuria category at screening, history of CV disease, and  
4  
5 176 study, were used for the analysis of time-to-event clinical outcomes. The *P*-values for  
6  
7 177 interaction between the treatment group (finerenone or placebo) and each baseline subgroup  
8  
9 178 (age or sex) were based on stratified Cox proportional hazards models, accounting for the  
10  
11 179 treatment effect, the subgroup effect, and their interaction.  
12

13  
14 180

15 181 Changes in UACR and eGFR over time were assessed using a linear mixed-model analysis  
16  
17 182 accounting for repeated measurements over time. The least-squares mean ratio and  
18  
19 183 absolute change from baseline were estimated from the models for changes in UACR and  
20  
21 184 eGFR, respectively. The 2-slope, linear spline, mixed-model, repeated measure method[29]  
22  
23 185 was used to estimate the rate of change in eGFR across time, specifically total (annualized  
24  
25 186 rate of change in eGFR from baseline to permanent discontinuation or end of study) and  
26  
27 187 chronic (from month 4 to permanent discontinuation or end of study) eGFR slopes. To  
28  
29 188 account for possible nonlinear effects of age on clinical outcomes, age was modeled with  
30  
31 189 cubic splines with 3 knots in Cox proportional hazards models, to produce plots of the hazard  
32  
33 190 ratios (HRs) and 95% confidence interval as functions of age and sex.  
34  
35  
36  
37

### 38 191 **Patients and public involvement**

39  
40 192 No patient or public involvement in the current study.  
41  
42

## 43 193 **RESULTS**

### 44 45 46 47 194 **Patients**

48  
49 195 FIDELITY included 13 026 patients.[23] Median follow-up was 3 years (interquartile range  
50  
51 196 2.3–3.8).[23] Mean age at baseline was 64.8 years (standard deviation 9.5), with 45.2%,  
52  
53 197 40.1%, and 14.7% of patients aged <65, 65–74, and ≥75 years at baseline, respectively.  
54  
55 198 Most patients (69.8%) were male; 2.5% were premenopausal females, and 27.8% were  
56  
57 199 postmenopausal females. Patients were distributed evenly between treatment arms within  
58  
59 200 age and sex subgroups (**eTable 1**).  
60

8

1  
2  
3 201 **Baseline characteristics**  
4

5 202 Baseline characteristics were similar across age subgroups except for some key differences  
6  
7 203 (**Table 1**). The overall FIDELITY population was predominantly White (68.1%), the proportion  
8  
9 204 of which increased with age. Mean eGFR was 64, 54, and 48 mL/min/1.73 m<sup>2</sup> in patients  
10  
11 205 aged <65, 65–75, and ≥75 years, respectively. Median UACR was 650, 439, and 332 mg/g in  
12  
13 206 patients aged <65, 65–75, and ≥75 years, respectively. History of CV disease was more  
14  
15 207 common in the ≥75 years group; this trend was also observed for atrial fibrillation/atrial flutter.  
16  
17 208 Baseline characteristics in sex subgroups are shown in **Table 1**.  
18  
19  
20  
21  
22  
23  
24  
25  
26  
27  
28  
29  
30  
31  
32  
33  
34  
35  
36  
37  
38  
39  
40  
41  
42  
43  
44  
45  
46  
47  
48  
49  
50  
51  
52  
53  
54  
55  
56  
57  
58  
59  
60

209 Table 1. Patient Baseline Characteristics According to Age and Sex

| Characteristic                               | All<br>(N=13 026) | Age                   |                         |                       | Sex              |                                    |                                      |
|----------------------------------------------|-------------------|-----------------------|-------------------------|-----------------------|------------------|------------------------------------|--------------------------------------|
|                                              |                   | <65 Years<br>(n=5889) | 65–74 Years<br>(n=5221) | ≥75 Years<br>(n=1916) | Male<br>(n=9088) | Premenopausal<br>Female<br>(n=323) | Postmenopausal<br>Female<br>(n=3615) |
| Age, y, mean ± SD                            | 64.8 ± 9.5        | 56.4 ± 6.6            | 69.2 ± 2.8              | 78.4 ± 3.1            | 64.8 ± 9.5       | 45.1 ± 4.9                         | 66.3 ± 8.0                           |
| Sex, n (%)                                   |                   |                       |                         |                       |                  |                                    |                                      |
| Female                                       | 3938 (30.2)       | 1839 (31.2)           | 1501 (28.7)             | 598 (31.2)            | 9088 (100)       | 0 (0.0)                            | 0 (0.0)                              |
| Male                                         | 9088 (69.8)       | 4050 (68.8)           | 3720 (71.3)             | 1318 (68.8)           | 0 (0.0)          | 323 (100)                          | 3615 (100)                           |
| Race, n (%)                                  |                   |                       |                         |                       |                  |                                    |                                      |
| Asian                                        | 2894 (22.2)       | 1591 (27.0)           | 997 (19.1)              | 306 (16.0)            | 2136 (23.5)      | 87 (26.9)                          | 671 (18.6)                           |
| Black/African American                       | 522 (4.0)         | 309 (5.2)             | 160 (3.1)               | 53 (2.8)              | 284 (3.1)        | 37 (11.5)                          | 201 (5.6)                            |
| White                                        | 8869 (68.1)       | 3592 (61.0)           | 3817 (73.1)             | 1460 (76.2)           | 6231 (68.6)      | 167 (51.7)                         | 2471 (68.4)                          |
| Other <sup>a</sup>                           | 741 (5.7)         | 397 (6.7)             | 247 (4.7)               | 97 (5.1)              | 437 (4.8)        | 32 (9.9)                           | 272 (7.5)                            |
| Systolic blood pressure, mm Hg, mean (SD)    | 136.7 ± 14.2      | 135.6 ± 14.0          | 137.4 ± 14.2            | 138.4 ± 14.6          | 136.8 ± 14.2     | 133.0 ± 14.0                       | 136.9 ± 14.3                         |
| Diastolic blood pressure, mm Hg, mean (SD)   | 76.4 ± 9.6        | 78.8 ± 9.1            | 74.9 ± 9.4              | 72.8 ± 9.8            | 76.5 ± 9.7       | 80.1 ± 8.4                         | 75.6 ± 9.5                           |
| Duration of diabetes, years, mean (SD)       | 15.4 ± 8.7        | 13.5 ± 7.6            | 16.4 ± 8.6              | 18.6 ± 10.4           | 15.3 ± 8.5       | 10.6 ± 7.0                         | 16.0 ± 9.1                           |
| HbA1c, %, mean (SD)                          | 7.7 ± 1.4         | 7.9 ± 1.5             | 7.6 ± 1.3               | 7.4 ± 1.2             | 7.6 ± 1.3        | 8.2 ± 1.7                          | 7.9 ± 1.4                            |
| Serum potassium, mmol/L, mean (SD)           | 4.4 ± 0.4         | 4.4 ± 0.5             | 4.4 ± 0.4               | 4.4 ± 0.4             | 4.3 ± 0.4        | 4.3 ± 0.4                          | 4.4 ± 0.4                            |
| eGFR, mL/min/1.73 m <sup>2</sup> , mean (SD) | 57.6 ± 21.7       | 64.3 ± 24.0           | 53.5 ± 18.5             | 48.1 ± 15.1           | 57.7 ± 21.2      | 77.0 ± 28.9                        | 55.6 ± 21.3                          |

|                                                 |                          |                          |                          |                         |                          |                          |                          |
|-------------------------------------------------|--------------------------|--------------------------|--------------------------|-------------------------|--------------------------|--------------------------|--------------------------|
| UACR, mg/g, median (Q1–Q3)                      | 514.68<br>(197.8–1147.1) | 650.48<br>(315.2–1363.5) | 438.63<br>(154.1–1030.7) | 332.29<br>(107.8–830.5) | 511.53<br>(200.9–1130.1) | 793.52<br>(376.6–1547.3) | 501.47<br>(173.6–1149.1) |
| BMI, kg/m <sup>2</sup> , mean (SD)              | 31.3 ± 6.0               | 32.0 ± 6.4               | 31.1 ± 5.7               | 29.6 ± 5.0              | 31.0 ± 5.6               | 34.1 ± 7.9               | 32.0 ± 6.6               |
| Current smoker, <i>n</i> (%)                    | 2093 (16.1)              | 1283 (21.8)              | 686 (13.1)               | 124 (6.5)               | 1730 (19.0)              | 35 (10.8)                | 328 (9.1)                |
| History of CV disease, present, <i>n</i> (%)    | 5935 (45.6)              | 2188 (37.2)              | 2667 (51.1)              | 1080 (56.4)             | 4374 (48.1)              | 56 (17.3)                | 1505 (41.6)              |
| History of heart failure                        | 1007 (7.7)               | 413 (7.0)                | 432 (8.3)                | 162 (8.5)               | 630 (6.9)                | 22 (6.8)                 | 355 (9.8)                |
| History of atrial fibrillation/atrial flutter   | 1106 (8.5)               | 266 (4.5)                | 547 (10.5)               | 293 (15.3)              | 867 (9.5)                | 0                        | 239 (6.6)                |
| Baseline medications, <i>n</i> (%) <sup>b</sup> |                          |                          |                          |                         |                          |                          |                          |
| RAS inhibitors (ACEis/ARBs)                     | 13003 (99.8)             | 5876 (99.8)              | 5213 (99.8)              | 1914 (99.9)             | 9069 (99.8)              | 323 (100.0)              | 3611 (99.9)              |
| Beta-blockers                                   | 6504 (49.9)              | 2619 (44.5)              | 2849 (54.6)              | 1036 (54.1)             | 4545 (50.0)              | 111 (34.4)               | 1848 (51.1)              |
| Diuretics                                       | 6710 (51.5)              | 2790 (47.4)              | 2813 (53.9)              | 1107 (57.8)             | 4706 (51.8)              | 137 (42.4)               | 1867 (51.6)              |
| Statins                                         | 9399 (72.2)              | 4033 (68.5)              | 3920 (75.1)              | 1446 (75.5)             | 6696 (73.7)              | 203 (62.8)               | 2500 (69.2)              |
| Calcium channel blockers                        | 7358 (56.5)              | 3127 (53.1)              | 3052 (58.5)              | 1179 (61.5)             | 5208 (57.3)              | 149 (46.1)               | 2001 (55.4)              |
| Insulin                                         | 7630 (58.6)              | 3637 (61.8)              | 3020 (57.8)              | 973 (50.8)              | 5203 (57.3)              | 193 (59.8)               | 2234 (61.8)              |
| GLP-1RA                                         | 944 (7.2)                | 492 (8.4)                | 378 (7.2)                | 74 (3.9)                | 676 (7.4)                | 30 (9.3)                 | 238 (6.6)                |
| SGLT-2i                                         | 877 (6.7)                | 517 (8.8)                | 289 (5.5)                | 71 (3.7)                | 671 (7.4)                | 36 (11.1)                | 170 (4.7)                |

ACEi = angiotensin-converting enzyme inhibitor; ARB = angiotensin receptor blocker; BMI = body mass index; CV = cardiovascular; eGFR = estimated

glomerular filtration rate; GLP-1RA = glucagon-like peptide-1 receptor agonist; HbA1c = glycated hemoglobin; Q = quartile; RAS = renin–angiotensin system;

SD = standard deviation; SGLT-2i = sodium-glucose co-transporter-2 inhibitor; UACR = urine albumin-to-creatinine ratio.

<sup>a</sup> Other: included American Indian/Alaska Native, Native Hawaiian/other Pacific Islander, not reported, multiple.

<sup>b</sup> Analysis allowed multiple drug groups for the same drug.

## 215 Efficacy

### 216 CV composite outcome by age

217 CV composite event rates, including the components of the composite outcome, increased  
218 with patient age in both treatment arms (**Figure 1A** and **eFigure 1A**). Treatment with  
219 finerenone resulted in a numerical reduction in CV composite event rates versus placebo in  
220 all age groups (**Figure 1A**); however, no significant heterogeneity was observed for the effect  
221 of finerenone across categorical age subgroups ( $P_{\text{interaction}}=.42$ ). There was also no evidence  
222 of treatment effect modification when age was modeled as a continuous variable  
223 ( $P_{\text{interaction}}=.10$ ). The trend of HR as a function of age was modeled with cubic splines  
224 (**eFigure 2A**).

225  
226 HHF event rates were numerically lower with finerenone than placebo in all age subgroups  
227 (**Figure 1A**). The effect of finerenone on HHF risk reduction was consistent across age  
228 subgroups, with no significant heterogeneity observed ( $P_{\text{interaction}}=.70$ ).

### 229 CV composite outcome by sex

230 CV composite event rates were numerically lower with finerenone than placebo for males,  
231 premenopausal females, and postmenopausal females (**Figure 1B** and **eFigure 1B**). There  
232 was no significant heterogeneity in the effect of finerenone on reducing the risk of the CV  
233 composite outcome across sex subgroups ( $P_{\text{interaction}}=.99$ ). When age was modeled with cubic  
234 splines by sex, the effect of finerenone was consistent with advancing age in males;  
235 however, a trend toward a stronger effect in older versus younger females was noted  
236 (**eFigure 2B**, **eFigure 2C**). Age distribution by sex is demonstrated in **eFigure 2D**.

237

238 No heterogeneity was observed in the effect of finerenone on reducing the risk of the CV  
239 death, nonfatal myocardial infarction, and nonfatal stroke components of the CV composite  
240 outcome (**eFigure 1B**). However, statistical heterogeneity was observed in the reduction of

12



1  
2  
3 241 HHF with finerenone versus placebo ( $P_{\text{interaction}}=.02$ ), and the effect appeared to be more  
4  
5 242 pronounced in males than premenopausal/postmenopausal females (**Figure 1B**). These  
6  
7 243 results persisted after adjustment for differences in baseline age, body mass index, systolic  
8  
9 244 blood pressure, hemoglobin, eGFR, UACR, smoking history, and history of atrial fibrillation  
10  
11 245 between sex subgroups ( $P_{\text{interaction}}=.02$ ).

#### 14 246 Kidney composite outcome by age

16  
17 247 Kidney composite event rates were lower with finerenone than placebo in the <65 years and  
18  
19 248 the 65–74 years groups but were similar in the  $\geq 75$  years group (**Figure 2A**). The effect of  
20  
21 249 finerenone on reducing the risk of the kidney composite outcome was consistent across age  
22  
23 250 subgroups, with no significant heterogeneity detected ( $P_{\text{interaction}}=.51$ ) and no evidence of  
24  
25 251 treatment effect modification when age was modeled as a continuous variable ( $P_{\text{interaction}}=.77$ ).  
26  
27 252 The trend of HR as function of age was modeled with cubic splines (**eFigure 3A**).

#### 30 253 Kidney composite outcome by sex

31  
32  
33 254 Kidney composite event rates were lower with finerenone than placebo in males but were  
34  
35 255 similar in premenopausal and postmenopausal females (**Figure 2B**). There was no  
36  
37 256 significant heterogeneity in the effect of finerenone on reducing the risk of the kidney  
38  
39 257 composite outcome across sex subgroups ( $P_{\text{interaction}}=.85$ ). When age was modeled with cubic  
40  
41 258 splines by sex subgroups, the effect of finerenone suggests trends similar to overall results in  
42  
43 259 males and females across all age groups (**eFigure 3B**, **eFigure 3C**). Age distribution by sex  
44  
45 260 is demonstrated in **eFigure 3D**.

#### 48 261 Effect of finerenone on markers of kidney function and damage by age and sex

49  
50  
51 262 Finerenone significantly attenuated the least-squares mean change in eGFR from month 4 to  
52  
53 263 end of treatment (chronic eGFR slope) compared with placebo across all age ( $P<.0001$  for all  
54  
55 264 3 subgroups) (**Figure 3**) and sex subgroups (**eFigure 4**). Finerenone reduced UACR over  
56  
57 265 time compared with placebo regardless of age and sex (**eFigure 5**).

## 266 **Safety**

267 The incidence of any AE was similar between treatment groups irrespective of age or sex  
268 (**eTable 2**). There were more drug-related AEs with finerenone than placebo in age and sex  
269 subgroups except premenopausal females, where the incidence was similar. AEs leading to  
270 drug discontinuation were more frequent in patients given finerenone than placebo (6.4%  
271 and 5.4%, respectively), with higher incidences in the 65–74 and ≥75 years groups than the  
272 <65 years group; there were more AEs leading to drug discontinuation with finerenone than  
273 placebo in males and premenopausal females but not in postmenopausal females.

274

275 Although the incidences of any serious AEs (SAEs), study drug-related SAEs, or SAEs  
276 leading to drug discontinuation were similar between treatment arms across all age and sex  
277 subgroups, the overall incidences of SAEs increased with age and was highest in males,  
278 followed by postmenopausal females, then premenopausal females.

279

280 In all age and sex subgroups, the incidences of treatment-emergent hypotension AEs were  
281 higher with finerenone than placebo but did not have a substantial impact on related clinical  
282 outcomes, including falls, dizziness, and fatigue. A trend of increased incidence of  
283 hypotension with increasing age was observed in patients treated with finerenone; however,  
284 the incidence of hypotension was generally low across all age subgroups (<6%; **eTable 2**).

285

286 In FIDELITY, finerenone increased the risk of any hyperkalemia event versus placebo;  
287 similar findings were observed in all age and sex subgroups, except premenopausal females  
288 (**eTable 2**). The incidences of any hyperkalemia AEs leading to discontinuation of study drug  
289 and any serious hyperkalemia AEs leading to hospitalization were low across all age and sex  
290 subgroups (<3% and <2%, respectively). However, the relative risk of treatment  
291 discontinuation because of hyperkalemia with finerenone versus placebo increased with  
292 advancing age (relative risk [95% confidence interval] for ages 45–64, 65–74, and ≥75 years:

1  
2  
3 293 2.2 [1.2–4.3], 2.8 [1.7–4.7], and 4.4 [1.8–10.8], respectively; **eFigure 6**). Treatment-emergent  
4  
5 294 serum potassium levels >5.5 mmol/L and >6.0 mmol/L were more frequent with finerenone  
6  
7 295 than placebo, being consistent across all age and sex subgroups. The incidence of  
8  
9 296 gynecomastia in males was the same with finerenone (0.2%) and placebo (0.2%) across all  
10  
11 297 ages.

## 14 298 **DISCUSSION**

17 299 The findings of this post hoc analysis suggest that finerenone reduced the risk of CV and  
18  
19 300 kidney composite outcomes versus placebo across all age and sex subcategories. In  
20  
21 301 FIDELITY, HHF was the main driver of CV benefit with finerenone[23]; lower incidences of  
22  
23 302 HHF with finerenone versus placebo were observed in this analysis across all age  
24  
25 303 subgroups, with some differences noted between sex subgroups. Moreover, the incidences  
26  
27 304 of any AEs or SAEs were similar between the treatment groups regardless of age and sex.

30 305  
31  
32 306 The current results are supported by findings from a pharmacokinetics (PK) analysis based  
33  
34 307 on FIDELIO-DKD and FIGARO-DKD data, in which both age and sex were tested as  
35  
36 308 covariates for a population PK model, and their effect on finerenone exposure was not  
37  
38 309 significant, suggesting a lack of influence of these factors on the PK of the drug.[30]

40 310 Additionally, the results for the CV outcome in this analysis are similar to findings from other  
41  
42 311 studies of MRAs in HF. In TOPCAT (Treatment of Preserved Cardiac Function Heart Failure  
43  
44 312 with an Aldosterone Antagonist), age did not affect the efficacy of spironolactone in patients  
45  
46 313 with HF with reduced ejection fraction (primary composite outcome: CV death, aborted  
47  
48 314 cardiac arrest and HHF; secondary outcomes included CV death, all-cause death and  
49  
50 315 HHF).[31] Moreover, in analyses of HF studies (RALES [Effect of Spironolactone on  
51  
52 316 Morbidity and Mortality in Patients with Severe Heart Failure], EMPHASIS-HF [Eplerenone in  
53  
54 317 Patients with Systolic Heart Failure and Mild Symptoms], and TOPCAT), MRAs reduced  
55  
56 318 morbidity and mortality in elderly patients,[32] demonstrating a consistent benefit regardless  
57  
58 319 of sex.[33] In contrast to our results, female sex was associated with poorer kidney outcomes

1  
2  
3 320 versus male sex in patients receiving a steroidal MRA for bilateral primary aldosteronism.[34]  
4

5 321 The MR can be activated by different drivers in different diseases; MR activation in diabetes  
6

7 322 is driven by additional factors other than high aldosterone in comparison with primary  
8

9 323 aldosteronism, which may account for differences in outcomes observed across different  
10

11 324 indications.[35]  
12

13 325  
14

15 326 In this study, the elderly population had higher risk of certain AEs including hypotension, AEs  
16

17 327 leading to discontinuation, and death. Hypotension occurred more frequently in the  
18

19 328 finerenone group but did not seem to substantially affect related clinical outcomes.  
20

21 329 Hyperkalemia was more prevalent with finerenone but was generally similar across age and  
22

23 330 sex. In a FIDELIO-DKD subanalysis, younger age and female sex were independent risk  
24

25 331 factors for hyperkalemia (>6.0 mmol/L).[36] Similar findings for age were observed in  
26

27 332 TOPCAT post hoc data for patients with HF.[31] Steroidal MRAs have been associated with  
28

29 333 gynecomastia in males,[37,38] which was not observed in this study, most likely because  
30

31 334 finerenone has no detectable affinity for androgen receptors.[38]  
32

33 335  
34

35 336 Preclinical data suggest that different molecular mechanisms drive endothelial dysfunction in  
36

37 337 male and female mice[39,40] and that increased age and male sex are associated with MR  
38

39 338 overactivation, which is linked to vascular stiffness and endothelial dysfunction.[41,42] In  
40

41 339 human aortic smooth muscle cells, MR expression increased with age, leading to epigenetic  
42

43 340 changes associated with increased vascular stiffness. These effects were reversed with MR  
44

45 341 inhibition.[43] In vitro, MR expression in the whole aortae and early passage aortic vascular  
46

47 342 smooth muscle cells was increased in aged (30 months) versus adult (8 months) rat  
48

49 343 cells.[41] In a preclinical mouse model, aortic stiffness occurred earlier in male than female  
50

51 344 mice and correlated with the timing of increased aortic MR expression; vascular stiffness was  
52

53 345 prevented in smooth muscle cell MR-deficient mice.[42] These data suggest that elderly  
54

55 346 males may derive the greatest benefit from finerenone; indeed, in this analysis, finerenone-  
56

57 347 treated males had lower risk of the CV composite outcome and HHF versus placebo across  
58

59  
60 16

1  
2  
3 348 age groups, including >75 years. Moreover, statistical heterogeneity was observed for HHF  
4  
5 349 by sex, persisting after adjustment for differences in baseline characteristics, which might  
6  
7 350 suggest a more pronounced effect of finerenone on HHF reduction in the male subgroup  
8  
9 351 compared with the 2 female subgroups. However, because of the small sample size of the  
10  
11 352 sex subgroups (especially that of the premenopausal female subgroup), definitive  
12  
13 353 conclusions cannot be reached based on this finding.  
14

15  
16 354

17  
18 355 In this study, markers of kidney damage (eGFR decline and UACR) were reduced with  
19  
20 356 finerenone in age subgroups; however, no benefit on kidney outcomes was observed in the  
21  
22 357 >75 years age group. The small sample size of this subgroup precluded definitive  
23  
24 358 conclusions, which may be accounted for by the slowing rate of CKD progression with  
25  
26 359 advancing age.[44,45]  
27

28 360

29  
30 361 Limitations include the study being a post hoc analysis and the chosen age categories not  
31  
32 362 being predefined. In addition, patients may have initiated other treatments during the study.  
33  
34 363 Sample size and number of events for females, particularly premenopausal females, were  
35  
36 364 small. Therefore, there is uncertainty around the estimates and the analysis was  
37  
38 365 underpowered to draw meaningful conclusions in this subgroup. Results for premenopausal  
39  
40 366 females versus postmenopausal females/males should be interpreted with caution because  
41  
42 367 age may partly account for differences observed; the average age of premenopausal females  
43  
44 368 was ~45 years old compared with postmenopausal females (~66 years old) and males  
45  
46 369 (~65 years old) (**Table 1**). As such, these groups had different baseline characteristics.  
47  
48 370 Higher baseline mean eGFR and median UACR, and lower history of CV comorbidities and  
49  
50 371 hypotension were observed in premenopausal females versus males and postmenopausal  
51  
52 372 females. Additionally, the study design and tests performed may have been underpowered to  
53  
54 373 address the research questions. Furthermore, FIDELITY limitations, mainly the small  
55  
56 374 proportion of Black patients and exclusion of patients with nonalbuminuric CKD, were  
57  
58 375 present in this analysis.  
59  
60

17

376

377 In conclusion, this post hoc FIDELITY analysis suggests that finerenone effectively lowers  
378 the risk of clinically important cardiovascular and kidney outcomes in patients with CKD and  
379 T2D across ages and sexes, with a potentially more pronounced effect on HHF in males than  
380 in females. No new safety concerns were identified in those aged >65 years or by sex.

381

For peer review only

## 382 **ACKNOWLEDGMENTS**

383 Medical writing assistance was provided by Fay Nikolopoulou, MSc and Ines Neves, MSc of  
384 Chameleon Communications International, and was funded by Bayer AG.

385

## 386 **FUNDING**

387 This work was supported by Bayer AG, who funded the FIDELIO-DKD and FIGARO-DKD  
388 studies and combined analysis. Grant/ award number: Not applicable

389

## 390 **CONTRIBUTORS**

391 SB prepared the initial analysis; SB, MEFC, RB, SDA, GLB, GF, PR, LMR, AEF, PK, AL, MB,  
392 and BP had access to and participated in the interpretation of the data. SB developed the  
393 initial manuscript draft, which was then reviewed and edited by MEFC, RB, SDA, GLB, GF,  
394 PR, LMR, AEF, PK, AL, MB, and BP. SB, MEFC, RB, SDA, GLB, GF, PR, LMR, AEF, PK,  
395 AL, MB, and BP vouch for the completeness and accuracy of the data and agreed to submit  
396 the manuscript for publication. The Executive Committee (including SDA, GLB, GF, PR, LMR  
397 and BP) in collaboration with the funder (including AEF, PK, AL, and MB) designed the trials  
398 and protocols and supervised trial conduct. The funder also had a role in the management,  
399 analysis, and interpretation of the data; preparation, review, or approval of the manuscript;  
400 and decision to submit the manuscript for publication.

## 401 **DISCLOSURES**

402 **SB** reports research support from 3ive, Bayer, Boehringer Ingelheim, Novartis, and Novo  
403 Nordisk; honorarium from UpToDate; consultancy fees from Baxter; and speaker bureau fees  
404 from Home Dialysis University and PD Excellence Academy.

405 **MEFC** reports consultancy fees from AstraZeneca, Bayer, Boehringer Ingelheim, and  
406 Fresenius Medical Care, and research support from Baxter and Fresenius.

19

1  
2  
3 407 **RB** reports consultancy fees from AstraZeneca, Bayer, Boehringer Ingelheim, Gilead, MSD,  
4  
5 408 Mundipharma, Sanofi, and Servier.

6  
7 409 **SDA** reports grants from Abbott Vascular and Vifor International; and personal fees  
8  
9 410 from Amgen, AstraZeneca, Bayer, Boehringer Ingelheim, BioVentrix, Brahms, Cardiac  
10  
11 411 Dimensions, Cardior, Cordio, CVRx, Edwards, Impulse Dynamics, Janssen, Novartis,  
12  
13 412 Occlutech, Respicardia, Servier, Vectorious, and V-Wave.

14  
15 413 **GLB** reports consultancy fees from Alnylam, Ionis, and Merck.

16  
17 414 **GF** is a trial committee member for Amgen, Bayer (no fees received), Boehringer Ingelheim,  
18  
19 415 Medtronic, Novartis, Servier, and Vifor.

20  
21 416 **PR** reports personal fees from Bayer during the conduct of the study; he has received  
22  
23 417 research support and personal fees from AstraZeneca and Novo Nordisk, and personal fees  
24  
25 418 from Astellas, Boehringer Ingelheim, Eli Lilly, Gilead, Mundipharma, Sanofi, and Vifor; all  
26  
27 419 fees are given to Steno Diabetes Center Copenhagen.

28  
29 420 **LMR** reports consultancy fees from Bayer.

30  
31 421 **AEF, PK, AL, and MA** are all full-time employees of Bayer.

32  
33 422 **BP** reports consultant fees for AstraZeneca, Bayer, Boehringer Ingelheim, Brainstorm  
34  
35 423 Medical, Cereno Scientific, G3 Pharmaceuticals, KBP Biosciences, PhaseBio, Proton Intel,  
36  
37 424 Sanofi/Lexicon, Sarfez, scPharmaceuticals, SQ Innovation, Tricida, and Vifor/Relypsa; he  
38  
39 425 has stock options for Brainstorm Medical, Cereno Scientific, G3 Pharmaceuticals, KBP  
40  
41 426 Biosciences, Proton Intel, Sarfez, scPharmaceuticals, SQ Innovation, Tricida, and  
42  
43 427 Vifor/Relypsa; he also holds a patent for site-specific delivery of eplerenone to the  
44  
45 428 myocardium (US patent #9931412) and a provisional patent for histone-acetylation-  
46  
47 429 modulating agents for the treatment and prevention of organ injury (provisional patent US  
48  
49 430 63/045,784).



## 431 DATA SHARING STATEMENT

432 Availability of the data underlying this publication will be determined according to Bayer's  
433 commitment to the EFPIA/PhRMA "Principles for responsible clinical trial data sharing". This  
434 pertains to scope, timepoint, and process of data access.

435 As such, Bayer commits to sharing upon request from qualified scientific and medical  
436 researchers, patient-level clinical trial data, study-level clinical trial data, and protocols from  
437 clinical trials in patients for medicines and indications approved in the United States (US) and  
438 European Union (EU) as necessary for conducting legitimate research. This applies to data  
439 on new medicines and indications that have been approved by the EU and US regulatory  
440 agencies on or after January 01, 2014.

441 Interested researchers can use [www.vivli.org](http://www.vivli.org) to request access to anonymized patient-level  
442 data and supporting documents from clinical studies to conduct further research that can  
443 help advance medical science or improve patient care. Information on the Bayer criteria for  
444 listing studies and other relevant information is provided in the member section of the portal.  
445 Data access will be granted to anonymized patient-level data, protocols, and clinical study  
446 reports after approval by an independent scientific review panel. Bayer is not involved in the  
447 decisions made by the independent review panel. Bayer will take all necessary measures to  
448 ensure that patient privacy is safeguarded.

449 **REFERENCES**

- 450 1. Halter JB, Musi N, McFarland Horne F, *et al*. Diabetes and cardiovascular disease in  
451 older adults: Current status and future directions. *Diabetes* 2014;63:2578–89.
- 452 2. Maric-Bilkan C. Sex differences in micro- and macro-vascular complications of  
453 diabetes mellitus. *Clinical science (London, England : 1979)* 2017;131:833–46.
- 454 3. Melsom T, Norvik JV, Enoksen IT, *et al*. Sex differences in age-related loss of kidney  
455 function. *J Am Soc Nephrol* 2022;33:1891–902.
- 456 4. Bairey Merz CN, Dember LM, Ingelfinger JR, *et al*. Sex and the kidneys: Current  
457 understanding and research opportunities. *Nat Rev Nephrol* 2019;15:776–83.
- 458 5. Maric-Bilkan C. Sex differences in diabetic kidney disease. *Mayo Clin Proc*  
459 2020;95:587–99.
- 460 6. Yu MK, Lyles CR, Bent-Shaw LA, *et al*. Risk factor, age and sex differences in  
461 chronic kidney disease prevalence in a diabetic cohort: The Pathways Study. *Am J*  
462 *Nephrol* 2012;36:245–51.
- 463 7. Wiviott SD, Raz I, Bonaca MP, *et al*. Dapagliflozin and cardiovascular outcomes in  
464 type 2 diabetes. *N Engl J Med* 2019;380:347–57.
- 465 8. Heerspink HJL, Stefánsson BV, Correa-Rotter R, *et al*. Dapagliflozin in patients with  
466 chronic kidney disease. *N Engl J Med* 2020;383:1436–46.
- 467 9. Zannad F, Ferreira JP, Pocock SJ, *et al*. Cardiac and kidney benefits of empagliflozin  
468 in heart failure across the spectrum of kidney function: Insights from EMPEROR-  
469 Reduced. *Circulation* 2021;143:310–21.
- 470 10. Perkovic V, Jardine MJ, Neal B, *et al*. Canagliflozin and renal outcomes in type 2  
471 diabetes and nephropathy. *N Engl J Med* 2019;380:2295–306.
- 472 11. Chertow GM, Block GA, Correa-Rotter R, *et al*. Effect of cinacalcet on cardiovascular  
473 disease in patients undergoing dialysis. *N Engl J Med* 2012;367:2482–94.

- 1  
2  
3 474 12. Tuttle KR, Alicic RZ, Duru OK, *et al*. Clinical characteristics of and risk factors for  
4  
5 475 chronic kidney disease among adults and children: An analysis of the CURE-CKD  
6  
7 476 registry. *JAMA Netw Open* 2019;2:e1918169.  
8  
9 477 13. Gasparini A, Evans M, Coresh J, *et al*. Prevalence and recognition of chronic kidney  
10  
11 478 disease in Stockholm healthcare. *Nephrol Dial Transplant* 2016;31:2086–94.  
12  
13 479 14. Buonafine M, Bonnard B, Jaisser F. Mineralocorticoid receptor and cardiovascular  
14  
15 480 disease. *American journal of hypertension* 2018;31:1165–74.  
16  
17 481 15. Luther JM, Fogo AB. The role of mineralocorticoid receptor activation in kidney  
18  
19 482 inflammation and fibrosis. *Kidney Int Suppl* 2022;12:63–8.  
20  
21 483 16. Henschkowski J, Stuck AE, Frey BM, *et al*. Age-dependent decrease in 11beta-  
22  
23 484 hydroxysteroid dehydrogenase type 2 (11beta-HSD2) activity in hypertensive  
24  
25 485 patients. *Am J Hypertens* 2008;21:644–9.  
26  
27 486 17. Kolkhof P, Jaisser F, Kim SY, *et al*. Steroidal and novel non-steroidal  
28  
29 487 mineralocorticoid receptor antagonists in heart failure and cardiorenal diseases:  
30  
31 488 comparison at bench and bedside. *Handb Exp Pharmacol* 2017;243:271–305.  
32  
33 489 18. Pitt B. The role of mineralocorticoid receptor antagonists (MRAs) in very old patients  
34  
35 490 with heart failure. *Heart Fail Rev* 2012;17:573–9.  
36  
37 491 19. Cole TJ, Young MJ. 30 years of the mineralocorticoid receptor: Mineralocorticoid  
38  
39 492 receptor null mice: Informing cell-type-specific roles. *J Endocrinol* 2017;234:T83–T92.  
40  
41 493 20. Nakamura T, Girerd S, Jaisser F, *et al*. Nonepithelial mineralocorticoid receptor  
42  
43 494 activation as a determinant of kidney disease. *Kidney Int Suppl* 2022;12:12–8.  
44  
45 495 21. Wheeler DC, Stefánsson BV, Jongs N, *et al*. Effects of dapagliflozin on major adverse  
46  
47 496 kidney and cardiovascular events in patients with diabetic and non-diabetic chronic  
48  
49 497 kidney disease: A prespecified analysis from the DAPA-CKD trial. *The lancet*  
50  
51 498 *Diabetes & endocrinology* 2021;9:22–31.  
52  
53 499 22. Mann JFE, Fonseca V, Mosenzon O, *et al*. Effects of liraglutide versus placebo on  
54  
55 500 cardiovascular events in patients with type 2 diabetes mellitus and chronic kidney  
56  
57 501 disease. *Circulation* 2018;138:2908–18.  
58  
59  
60

- 1  
2  
3 502 23. Agarwal R, Filippatos G, Pitt B, *et al.* Cardiovascular and kidney outcomes with  
4  
5 503 finerenone in patients with type 2 diabetes and chronic kidney disease: the FIDELITY  
6  
7 504 pooled analysis. *European heart journal* 2022;43:474–84.  
8  
9 505 24. Bakris GL, Agarwal R, Anker SD, *et al.* Effect of finerenone on chronic kidney disease  
10  
11 506 outcomes in type 2 diabetes. *N Engl J Med* 2020;383:2219–29.  
12  
13 507 25. Pitt B, Filippatos G, Agarwal R, *et al.* Cardiovascular events with finerenone in kidney  
14  
15 508 disease and type 2 diabetes. *N Engl J Med* 2021;385:2252–63.  
16  
17 509 26. McKinlay SM, Brambilla DJ, Posner JG. The normal menopause transition. *Maturitas*  
18  
19 510 1992;14:103–15.  
20  
21 511 27. Kleinbaum DG, Klein M. The stratified Cox procedure. In: Kleinbaum DG, Klein M  
22  
23 512 eds. *Survival analysis: A self-learning text*. New York, NY: Springer New York  
24  
25 513 2012:201–40.  
26  
27 514 28. Therneau TM, Grambsch PM. The Cox model. In: Therneau TM, Grambsch PM eds.  
28  
29 515 *Modeling survival data: Extending the Cox model*. New York, NY: Springer New York  
30  
31 516 2000:39–77.  
32  
33 517 29. Vonesh E, Tighiouart H, Ying J, *et al.* Mixed-effects models for slope-based endpoints  
34  
35 518 in clinical trials of chronic kidney disease. *Stat Med* 2019;38:4218–39.  
36  
37 519 30. Eissing T, Gouloze SC, van den Berg P, *et al.* Pharmacokinetics and  
38  
39 520 pharmacodynamics of finerenone in patients with chronic kidney disease and type 2  
40  
41 521 diabetes: Insights based on FIGARO-DKD and FIDELIO-DKD. *Diabetes, obesity &*  
42  
43 522 *metabolism* 2023: doi:10.1111/dom.15387.  
44  
45 523 31. Vardeny O, Claggett B, Vaduganathan M, *et al.* Influence of age on efficacy and  
46  
47 524 safety of spironolactone in heart failure. *JACC Heart failure* 2019;7:1022–8.  
48  
49 525 32. Ferreira JP, Rossello X, Eschalier R, *et al.* MRAs in elderly HF patients: Individual  
50  
51 526 patient-data meta-analysis of RALES, EMPHASIS-HF, and TOPCAT. *JACC Heart*  
52  
53 527 *failure* 2019;7:1012–21.  
54  
55  
56  
57  
58  
59  
60

- 1  
2  
3 528 33. Rossello X, Ferreira JP, Pocock SJ, *et al.* Sex differences in mineralocorticoid  
4  
5 529 receptor antagonist trials: A pooled analysis of three large clinical trials. *European*  
6  
7 530 *journal of heart failure* 2020;22:834–44.  
8  
9 531 34. Nakamaru R, Yamamoto K, Akasaka H, *et al.* Sex differences in renal outcomes after  
10  
11 532 medical treatment for bilateral primary aldosteronism. *Hypertension* 2021;77:537–45.  
12  
13 533 35. Kawanami D, Takashi Y, Muta Y, *et al.* Mineralocorticoid receptor antagonists in  
14  
15 534 diabetic kidney disease. *Front Pharmacol* 2021;12:754239.  
16  
17 535 36. Agarwal R, Joseph A, Anker SD, *et al.* Hyperkalemia risk with finerenone: results  
18  
19 536 from the FIDELIO-DKD trial. *J Am Soc Nephrol* 2022;33:225–37.  
20  
21 537 37. Hasegawa T, Nishiwaki H, Ota E, *et al.* Aldosterone antagonists for people with  
22  
23 538 chronic kidney disease requiring dialysis. *Cochrane Database of Systematic Reviews*  
24  
25 539 2021;2:Cd013109.  
26  
27 540 38. Kolkhof P, Joseph A, Kintscher U. Nonsteroidal mineralocorticoid receptor  
28  
29 541 antagonism for cardiovascular and renal disorders – new perspectives for  
30  
31 542 combination therapy. *Pharmacol Res* 2021;172:105859.  
32  
33 543 39. Davel AP, Jaffe IZ, Tostes RC, *et al.* New roles of aldosterone and mineralocorticoid  
34  
35 544 receptors in cardiovascular disease: Translational and sex-specific effects. *Am J*  
36  
37 545 *Physiol Heart Circ Physiol* 2018;315:H989–H99.  
38  
39 546 40. Faulkner JL, Kennard S, Huby AC, *et al.* Progesterone predisposes females to  
40  
41 547 obesity-associated leptin-mediated endothelial dysfunction via upregulating  
42  
43 548 endothelial MR (mineralocorticoid receptor) expression. *Hypertension* 2019;74:678–  
44  
45 549 86.  
46  
47 550 41. Krug AW, Allenhofer L, Monticone R, *et al.* Elevated mineralocorticoid receptor  
48  
49 551 activity in aged rat vascular smooth muscle cells promotes a proinflammatory  
50  
51 552 phenotype via extracellular signal-regulated kinase 1/2 mitogen-activated protein  
52  
53 553 kinase and epidermal growth factor receptor-dependent pathways. *Hypertension*  
54  
55 554 2010;55:1476–83.  
56  
57  
58  
59  
60

- 1  
2  
3 555 42. DuPont JJ, Kim SK, Kenney RM, *et al.* Sex differences in the time course and  
4  
5 556 mechanisms of vascular and cardiac aging in mice: Role of the smooth muscle cell  
6  
7 557 mineralocorticoid receptor. *Am J Physiol Heart Circ Physiol* 2021;320:H169–H80.  
8  
9 558 43. Ibarrola J, Kim SK, Lu Q, *et al.* Smooth muscle mineralocorticoid receptor as an  
10  
11 559 epigenetic regulator of vascular aging. *Cardiovascular research* 2023;118:3386–400.  
12  
13 560 44. Mathur R, Dreyer G, Yaqoob MM, *et al.* Ethnic differences in the progression of  
14  
15 561 chronic kidney disease and risk of death in a UK diabetic population: An  
16  
17 562 observational cohort study. *BMJ Open* 2018;8:e020145.  
18  
19 563 45. Go AS, Yang J, Tan TC, *et al.* Contemporary rates and predictors of fast progression  
20  
21 564 of chronic kidney disease in adults with and without diabetes mellitus. *BMC Nephrol*  
22  
23 565 2018;19:146.  
24  
25  
26 566

## FIGURE LEGENDS

**Figure 1.** Analysis of CV composite outcome and HHF according to (A) age and (B) sex.

CV composite outcome includes CV death, nonfatal myocardial infarction, nonfatal stroke, or HHF.

CI = confidence interval; CV = cardiovascular; HHF = hospitalization for heart failure; PY = patient-years.

**Figure 2.** Analysis of kidney composite outcome according to (A) age and (B) sex.

Kidney composite outcome includes kidney failure, sustained  $\geq 57\%$  eGFR decline, or renal death.

CI = confidence interval; eGFR = estimated glomerular filtration rate; PY = patient-years.

**Figure 3.** LS mean change in eGFR from baseline, chronic, and total slopes over time by age.

Chronic eGFR slope from month 4 to end-of-study visit.

CI = confidence interval; eGFR = estimated glomerular filtration rate; LS = least-squares.

**A**

| Endpoint                         | Finerenone      |          | Placebo         |          | Hazard Ratio (95% CI) | P-Value for Interaction |
|----------------------------------|-----------------|----------|-----------------|----------|-----------------------|-------------------------|
|                                  | n/N (%)         | n/100 PY | n/N (%)         | n/100 PY |                       |                         |
| <b>CV composite, age (years)</b> |                 |          |                 |          |                       |                         |
| 1 Overall                        | 825/6519 (12.7) | 4.34     | 939/6507 (14.4) | 5.01     | 0.86 (0.78–0.95)      |                         |
| 2 Age <65                        | 323/2958 (10.9) | 3.74     | 337/2931 (11.5) | 3.93     | 0.94 (0.81–1.10)      |                         |
| 3 Age 65–74                      | 339/2635 (12.9) | 4.36     | 396/2586 (15.3) | 5.3      | 0.84 (0.73–0.98)      | .4198                   |
| 4 Age ≥75                        | 163/926 (17.6)  | 6.25     | 206/990 (20.8)  | 7.61     | 0.80 (0.65–0.99)      |                         |
| <b>HHF, age (years)</b>          |                 |          |                 |          |                       |                         |
| 7 Overall                        | 256/6519 (3.9)  | 1.31     | 325/6507 (5.0)  | 1.68     | 0.78 (0.66–0.92)      |                         |
| 8 Age <65                        | 94/2958 (3.2)   | 1.06     | 112/2931 (3.8)  | 1.27     | 0.83 (0.63–1.10)      |                         |
| 9 Age 65–74                      | 111/2653 (4.2)  | 1.38     | 135/2586 (5.2)  | 1.75     | 0.83 (0.65–1.08)      | .6977                   |
| 10 Age ≥75                       | 51/926 (5.5)    | 1.91     | 78/990 (7.9)    | 2.78     | 0.66 (0.46–0.95)      |                         |

**B**

| Endpoint                 | Finerenone      |          | Placebo         |          | Hazard Ratio (95% CI) | P-Value for Interaction |
|--------------------------|-----------------|----------|-----------------|----------|-----------------------|-------------------------|
|                          | n/N (%)         | n/100 PY | n/N (%)         | n/100 PY |                       |                         |
| <b>CV composite, sex</b> |                 |          |                 |          |                       |                         |
| 19 Overall               | 825/6519 (12.7) | 4.34     | 939/6507 (14.4) | 5.01     | 0.86 (0.78–0.95)      |                         |
| 20 Male                  | 579/4481 (12.9) | 4.39     | 675/4607 (14.7) | 5.08     | 0.86 (0.77–0.96)      |                         |
| 21 Premenopausal female  | 11/163 (6.7)    | 2.29     | 12/160 (7.5)    | 2.62     | 0.89 (0.35–2.27)      | .9942                   |
| 22 Postmenopausal female | 235/1875 (12.5) | 4.38     | 252/1740 (14.5) | 5.03     | 0.87 (0.73–1.05)      |                         |
| <b>HHF, sex</b>          |                 |          |                 |          |                       |                         |
| 25 Overall               | 256/6519 (3.9)  | 1.31     | 325/6507 (5.0)  | 1.68     | 0.78 (0.66–0.92)      |                         |
| 26 Male                  | 163/4481 (3.6)  | 1.20     | 244/4607 (5.3)  | 1.78     | 0.66 (0.54–0.81)      |                         |
| 28 Premenopausal female  | 5/163 (3.1)     | 1.02     | 4/160 (2.5)     | 0.85     | 1.39 (0.33–5.93)      | .0245                   |
| 29 Postmenopausal female | 88/1875 (4.7)   | 1.63     | 117/1740 (6.7)  | 2.14     | 1.06 (0.78–1.44)      |                         |



A

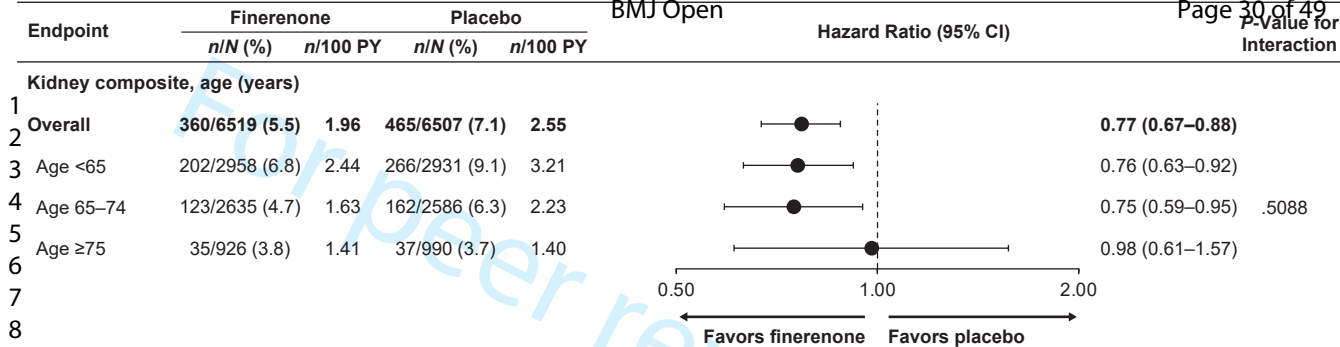

B

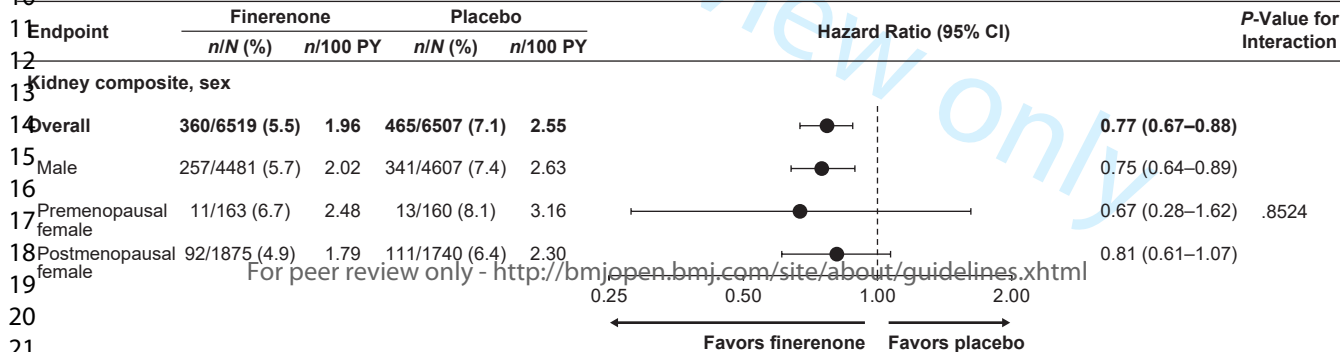

BMJ Open

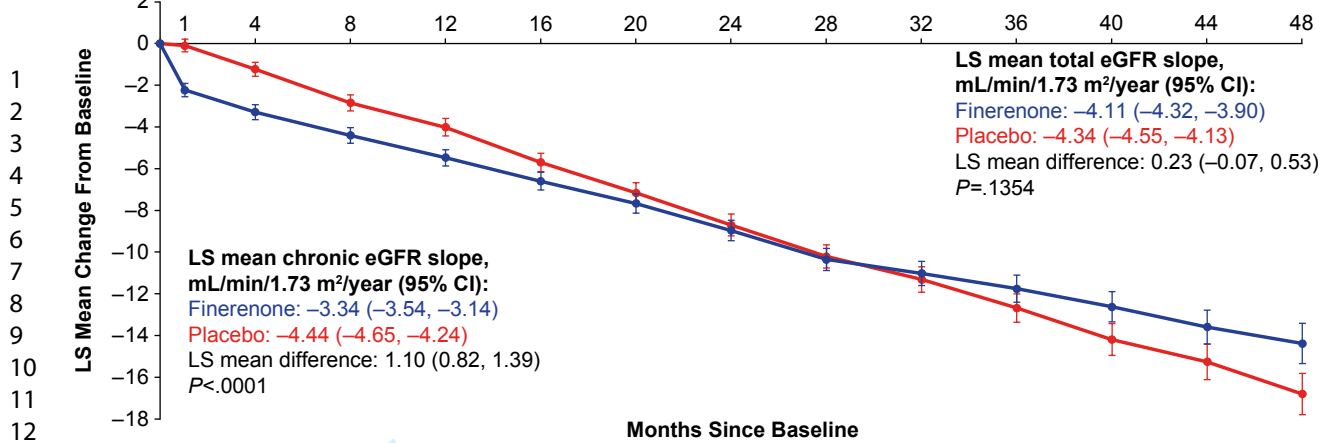

**Number of Subjects at Visit**

|            |      |      |      |      |      |      |      |      |      |      |      |     |     |
|------------|------|------|------|------|------|------|------|------|------|------|------|-----|-----|
| Finerenone | 2921 | 2849 | 2778 | 2730 | 2656 | 2505 | 2281 | 1918 | 1541 | 1246 | 962  | 716 | 409 |
| Placebo    | 2892 | 2829 | 2779 | 2719 | 2649 | 2491 | 2226 | 1952 | 1566 | 1271 | 1006 | 731 | 417 |

B 65 to 74 Years

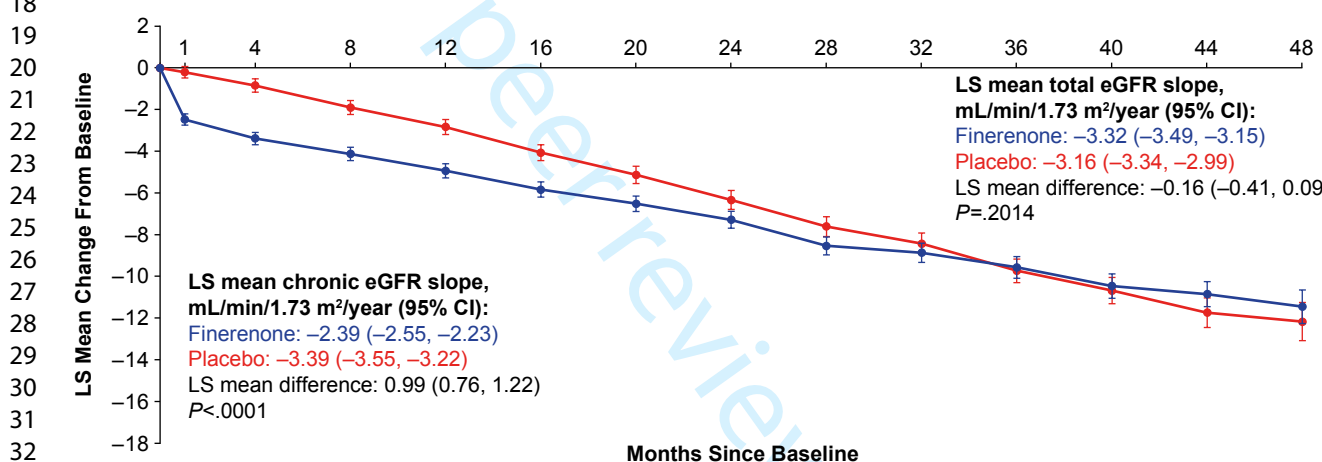

**Number of Subjects at Visit**

|            |      |      |      |      |      |      |      |      |      |      |     |     |     |
|------------|------|------|------|------|------|------|------|------|------|------|-----|-----|-----|
| Finerenone | 2597 | 2536 | 2474 | 2460 | 2388 | 2220 | 1995 | 1732 | 1462 | 1158 | 935 | 663 | 387 |
| Placebo    | 2539 | 2481 | 2429 | 2376 | 2326 | 2163 | 1951 | 1674 | 1360 | 1097 | 876 | 637 | 346 |

C ≥75 Years

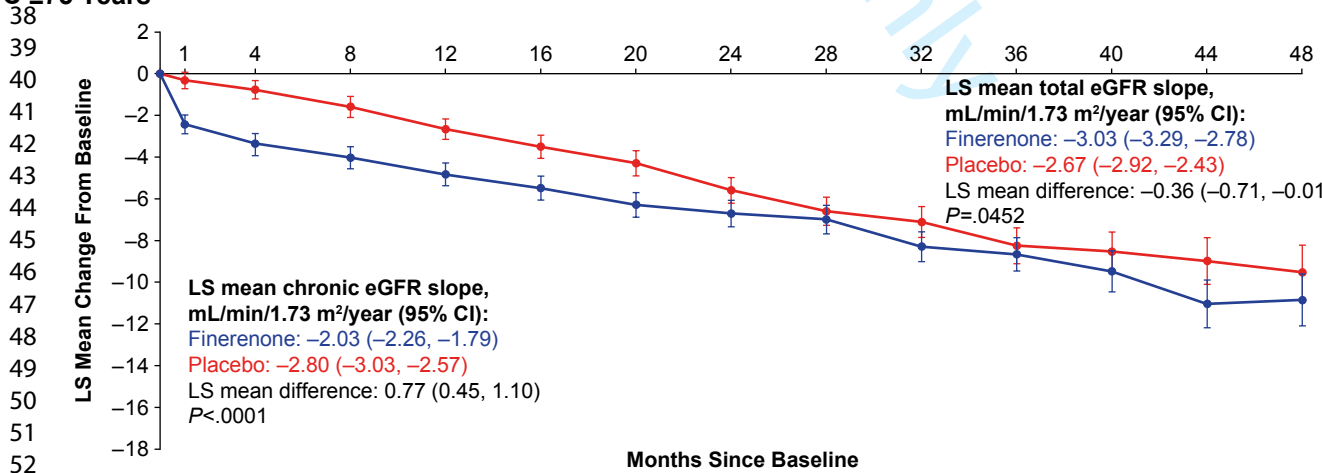

**Number of Subjects at Visit**

|            |     |     |     |     |     |     |     |     |     |     |     |     |     |
|------------|-----|-----|-----|-----|-----|-----|-----|-----|-----|-----|-----|-----|-----|
| Finerenone | 910 | 877 | 848 | 825 | 792 | 732 | 647 | 567 | 447 | 363 | 277 | 210 | 115 |
| Placebo    | 975 | 934 | 919 | 896 | 850 | 780 | 696 | 618 | 491 | 359 | 281 | 204 | 117 |

# Finerenone Cardiovascular and Kidney Outcomes by Age and Sex: FIDELITY Post Hoc Analysis of Two Phase 3, Multicenter, Double-Blind Trials

## Contents

Finerenone Cardiovascular and Kidney Outcomes by Age and Sex: FIDELITY Post Hoc Analysis of Two Phase 3, Multicenter, Double-Blind Trials ..... 1

Supplementary Tables and Figures ..... 2

**eTable 1.** Patient Baseline Characteristics According to Age and Sex Stratified by Treatment Group ..... 2

**eTable 2.** Treatment-Emergent AEs According to Age and Sex ..... 6

**eFigure 1.** Analysis of CV composite outcome and subcomponents according to (A) age and (B) sex ..... 8

**eFigure 2.** Hazard ratio (finerenone vs placebo) as a function of age modeled with cubic splines for CV composite outcome by age (A), spline for hazard ratio of CV composite outcomes by sex (B, C), and age distribution by sex (D). ..... 11

**eFigure 3.** Hazard ratio (finerenone vs placebo) as a function of age modeled with cubic splines for kidney composite outcome by age (A), spline for hazard ratio of kidney composite outcomes by sex (B, C), and age distribution by sex (D). ..... 12

**eFigure 4.** LS mean change in eGFR from baseline, chronic, and total slopes over time by sex ..... 13

**eFigure 5.** LS mean ratio to baseline UACR over time by age and sex ..... 14

**eFigure 6.** Relative risk of treatment-emergent hyperkalemia causing permanent discontinuation of study drug by age and sex ..... 15

**eFigure 7.** FIDELITY CONSORT diagram. .... 16

## Supplementary Tables and Figures

eTable 1. Patient Baseline Characteristics According to Age and Sex Stratified by Treatment Group

| n (%)                                     | All             |                 | Age             |                 |                 |                 |                |                | Sex             |                 |                        |                |                         |                 |
|-------------------------------------------|-----------------|-----------------|-----------------|-----------------|-----------------|-----------------|----------------|----------------|-----------------|-----------------|------------------------|----------------|-------------------------|-----------------|
|                                           |                 |                 | <65 Years       |                 | 65–74 Years     |                 | ≥75 Years      |                | Male            |                 | Female (Premenopausal) |                | Female (Postmenopausal) |                 |
|                                           | FIN<br>(n=6519) | PBO<br>(n=6507) | FIN<br>(n=2958) | PBO<br>(n=2931) | FIN<br>(n=2635) | PBO<br>(n=2586) | FIN<br>(n=926) | PBO<br>(n=990) | FIN<br>(n=4481) | PBO<br>(n=4607) | FIN<br>(n=163)         | PBO<br>(n=160) | FIN<br>(n=1875)         | PBO<br>(n=1740) |
| Age, y, mean ± SD                         | 64.7 ± 9.4      | 64.8 ± 9.7      | 56.5 ± 6.4      | 56.3 ± 6.7      | 69.1 ± 2.7      | 69.2 ± 2.8      | 78.4 ± 3.0     | 78.4 ± 3.1     | 64.8 ± 9.3      | 64.9 ± 9.6      | 45.3 ± 4.4             | 44.9 ± 5.4     | 66.2 ± 8.0              | 66.4 ± 8.0      |
| Sex, n (%)                                |                 |                 |                 |                 |                 |                 |                |                |                 |                 |                        |                |                         |                 |
| Female                                    | 2038<br>(31.3)  | 1900<br>(29.2)  | 959<br>(32.4)   | 880<br>(30.0)   | 772<br>(29.3)   | 729<br>(28.2)   | 307<br>(33.2)  | 291<br>(29.4)  | 0<br>(0.0)      | 0<br>(0.0)      | 163<br>(100)           | 160<br>(100)   | 1875<br>(100)           | 1740<br>(100)   |
| Male                                      | 4481<br>(68.7)  | 4607<br>(70.8)  | 1999<br>(67.6)  | 2051<br>(70.0)  | 1863<br>(70.7)  | 1857<br>(71.8)  | 619<br>(66.8)  | 699<br>(70.6)  | 4481<br>(100)   | 4607<br>(100)   | 0<br>(0.0)             | 0<br>(0.0)     | 0<br>(0.0)              | 0<br>(0.0)      |
| Race, n (%)                               |                 |                 |                 |                 |                 |                 |                |                |                 |                 |                        |                |                         |                 |
| Asian                                     | 1432<br>(22.0)  | 1462<br>(22.5)  | 772<br>(26.1)   | 819<br>(27.9)   | 518<br>(19.7)   | 479<br>(18.5)   | 142<br>(15.3)  | 164<br>(16.6)  | 1032<br>(23.0)  | 1104<br>(24.0)  | 45<br>(27.6)           | 42<br>(26.3)   | 355<br>(18.9)           | 316<br>(18.2)   |
| Black/African American                    | 253<br>(3.9)    | 269<br>(4.1)    | 158<br>(5.3)    | 151<br>(5.2)    | 75<br>(2.8)     | 85<br>(3.3)     | 20<br>(2.2)    | 33<br>(3.3)    | 137<br>(3.1)    | 147<br>(3.2)    | 17<br>(10.4)           | 20<br>(12.5)   | 99<br>(5.3)             | 102<br>(5.9)    |
| White                                     | 4449<br>(68.2)  | 4420<br>(67.9)  | 1827<br>(61.8)  | 1765<br>(60.2)  | 1908<br>(72.4)  | 1909<br>(73.8)  | 714<br>(77.1)  | 746<br>(75.4)  | 3099<br>(69.2)  | 3132<br>(68.0)  | 84<br>(51.5)           | 83<br>(51.9)   | 1266<br>(67.5)          | 1205<br>(69.3)  |
| Other <sup>a</sup>                        | 385<br>(5.9)    | 356<br>(5.5)    | 201<br>(6.8)    | 196<br>(6.7)    | 134<br>(5.1)    | 113<br>(4.4)    | 50<br>(5.4)    | 47<br>(4.7)    | 213<br>(4.8)    | 224<br>(4.9)    | 17<br>(10.4)           | 15<br>(9.4)    | 155<br>(8.3)            | 117<br>(6.7)    |
| Systolic blood pressure, mm Hg, mean (SD) | 136.8 ± 14.2    | 136.7 ± 14.3    | 135.7 ± 13.9    | 135.5 ± 14.1    | 137.4 ± 14.2    | 137.5 ± 14.2    | 138.4 ± 14.6   | 138.5 ± 14.6   | 136.9 ± 14.1    | 136.7 ± 14.3    | 131.6 ± 13.1           | 134.4 ± 14.7   | 136.8 ± 14.4            | 136.9 ± 14.0    |
| Diastolic blood pressure,                 | 76.3 ± 9.6      | 76.4 ± 9.6      | 78.7 ± 9.2      | 79.0 ± 8.9      | 74.8 ± 9.4      | 74.9 ± 9.4      | 73.2 ± 9.8     | 72.4 ± 9.8     | 76.6 ± 9.7      | 76.5 ± 9.7      | 78.7 ± 8.2             | 81.6 ± 8.4     | 75.6 ± 9.6              | 75.6 ± 9.4      |

| n (%)                                                 | All                  |                      | Age                  |                      |                      |                      |                      |                     | Sex                  |                      |                        |                      |                         |                      |
|-------------------------------------------------------|----------------------|----------------------|----------------------|----------------------|----------------------|----------------------|----------------------|---------------------|----------------------|----------------------|------------------------|----------------------|-------------------------|----------------------|
|                                                       |                      |                      | <65 Years            |                      | 65–74 Years          |                      | ≥75 Years            |                     | Male                 |                      | Female (Premenopausal) |                      | Female (Postmenopausal) |                      |
|                                                       | FIN<br>(n=6519)      | PBO<br>(n=6507)      | FIN<br>(n=2958)      | PBO<br>(n=2931)      | FIN<br>(n=2635)      | PBO<br>(n=2586)      | FIN<br>(n=926)       | PBO<br>(n=990)      | FIN<br>(n=4481)      | PBO<br>(n=4607)      | FIN<br>(n=163)         | PBO<br>(n=160)       | FIN<br>(n=1875)         | PBO<br>(n=1740)      |
| mm Hg, mean (SD)                                      |                      |                      |                      |                      |                      |                      |                      |                     |                      |                      |                        |                      |                         |                      |
| Duration of diabetes, y, mean (SD)                    | 15.4 ± 8.7           | 15.4 ± 8.7           | 13.6 ± 7.6           | 13.3 ± 7.7           | 16.4 ± 8.7           | 16.5 ± 8.5           | 18.7 ± 10.7          | 18.5 ± 10.2         | 15.4 ± 8.6           | 15.3 ± 8.4           | 11.0 ± 7.4             | 10.1 ± 6.5           | 15.9 ± 9.0              | 16.0 ± 9.2           |
| HbA1c, %, mean (SD)                                   | 7.7 ± 1.4            | 7.7 ± 1.4            | 7.9 ± 1.5            | 7.9 ± 1.5            | 7.6 ± 1.3            | 7.6 ± 1.3            | 7.5 ± 1.2            | 7.4 ± 1.2           | 7.6 ± 1.3            | 7.6 ± 1.3            | 8.1 ± 1.7              | 8.3 ± 1.6            | 7.9 ± 1.4               | 7.9 ± 1.5            |
| Serum potassium, mmol/L, mean (SD)                    | 4.4 ± 0.4            | 4.4 ± 0.4            | 4.3 ± 0.4            | 4.4 ± 0.5            | 4.4 ± 0.4            | 4.4 ± 0.4            | 4.4 ± 0.4            | 4.4 ± 0.4           | 4.3 ± 0.4            | 4.3 ± 0.5            | 4.3 ± 0.4              | 4.4 ± 0.4            | 4.4 ± 0.4               | 4.4 ± 0.4            |
| eGFR, mL/min/1.73 m <sup>2</sup> , mean (SD)          | 57.5 ± 21.6          | 57.7 ± 21.8          | 63.9 ± 23.9          | 64.6 ± 24.0          | 53.7 ± 18.4          | 53.3 ± 18.6          | 48.0 ± 15.5          | 48.3 ± 14.8         | 57.8 ± 21.0          | 57.7 ± 21.4          | 76.3 ± 28.7            | 77.5 ± 29.1          | 55.3 ± 21.5             | 55.8 ± 21.1          |
| eGFR, mL/min/1.73 m <sup>2</sup> , n (%) <sup>b</sup> |                      |                      |                      |                      |                      |                      |                      |                     |                      |                      |                        |                      |                         |                      |
| <25                                                   | 81 (1.2)             | 81 (1.2)             | 24 (0.8)             | 29 (1.0)             | 35 (1.3)             | 37 (1.4)             | 22 (2.4)             | 15 (1.5)            | 44 (1.0)             | 54 (1.2)             | 0                      | 2 (1.3)              | 37 (2.0)                | 25 (1.4)             |
| 25–<45                                                | 2117 (32.5)          | 2115 (32.5)          | 744 (25.2)           | 704 (24.0)           | 937 (35.6)           | 961 (37.2)           | 436 (47.1)           | 450 (45.5)          | 1392 (31.1)          | 1479 (32.1)          | 31 (19.0)              | 26 (16.3)            | 694 (37.0)              | 610 (35.1)           |
| 45–<60                                                | 1717 (26.3)          | 1717 (26.4)          | 666 (22.5)           | 649 (22.1)           | 775 (29.4)           | 739 (28.6)           | 276 (29.8)           | 329 (33.2)          | 1240 (27.7)          | 1228 (26.7)          | 26 (16.0)              | 24 (15.0)            | 451 (24.1)              | 465 (26.7)           |
| ≥60                                                   | 2603 (39.9)          | 2592 (39.8)          | 1523 (51.5)          | 1548 (52.8)          | 888 (33.7)           | 848 (32.8)           | 192 (20.7)           | 196 (19.8)          | 1805 (40.3)          | 1846 (40.1)          | 106 (65.0)             | 108 (67.5)           | 692 (36.9)              | 638 (36.7)           |
| UACR, mg/g, median (Q1–Q3)                            | 514.2 (197.5–1129.4) | 514.9 (198.2–1163.4) | 649.2 (308.0–1331.8) | 651.4 (322.5–1382.2) | 433.8 (150.7–1025.7) | 441.3 (157.8–1032.8) | 325.6 (107.00–802.7) | 340.5 (109.8–871.7) | 514.5 (205.3–1116.5) | 509.2 (195.4–1143.0) | 733.0 (336.3–1522.7)   | 868.4 (398.5–1604.2) | 496.4 (169.9–1124.4)    | 509.1 (185.0–1174.5) |
| UACR, mg/g, n (%) <sup>c</sup>                        |                      |                      |                      |                      |                      |                      |                      |                     |                      |                      |                        |                      |                         |                      |
| <30                                                   | 120 (1.8)            | 110 (1.7)            | 39 (1.3)             | 40 (1.4)             | 53 (2.0)             | 50 (1.9)             | 28 (3.0)             | 20 (2.0)            | 69 (1.5)             | 68 (1.5)             | 2 (1.2)                | 1 (0.6)              | 49 (2.6)                | 41 (2.4)             |
| 30–<300                                               | 2076 (31.8)          | 2023 (31.1)          | 686 (23.2)           | 645 (22.0)           | 971 (36.9)           | 936 (36.2)           | 419 (45.2)           | 442 (44.6)          | 1422 (31.7)          | 1459 (31.7)          | 34 (20.9)              | 20 (12.5)            | 620 (33.1)              | 544 (31.3)           |

| n (%)                                         | All          |              | Age          |              |              |              |             |             | Sex          |              |                        |             |                         |              |
|-----------------------------------------------|--------------|--------------|--------------|--------------|--------------|--------------|-------------|-------------|--------------|--------------|------------------------|-------------|-------------------------|--------------|
|                                               |              |              | <65 Years    |              | 65–74 Years  |              | ≥75 Years   |             | Male         |              | Female (Premenopausal) |             | Female (Postmenopausal) |              |
|                                               | FIN (n=6519) | PBO (n=6507) | FIN (n=2958) | PBO (n=2931) | FIN (n=2635) | PBO (n=2586) | FIN (n=926) | PBO (n=990) | FIN (n=4481) | PBO (n=4607) | FIN (n=163)            | PBO (n=160) | FIN (n=1875)            | PBO (n=1740) |
| ≥300                                          | 4321 (66.3)  | 4371 (67.2)  | 2231 (75.4)  | 2244 (76.6)  | 1611 (61.1)  | 1599 (61.8)  | 479 (51.7)  | 528 (53.3)  | 2989 (66.7)  | 3079 (66.8)  | 127 (77.9)             | 139 (86.9)  | 1205 (64.3)             | 1153 (66.3)  |
| BMI, kg/m <sup>2</sup> , mean (SD)            | 31.3 ± 6.0   | 31.3 ± 6.0   | 32.1 ± 6.5   | 32.0 ± 6.3   | 31.1 ± 5.7   | 31.1 ± 5.7   | 29.5 ± 4.8  | 29.6 ± 5.1  | 30.9 ± 5.6   | 30.9 ± 5.6   | 34.0 ± 7.9             | 34.3 ± 7.9  | 32.0 ± 6.7              | 32.1 ± 6.5   |
| Current smoker, n (%)                         | 1065 (16.3)  | 1028 (15.8)  | 657 (22.2)   | 626 (21.4)   | 351 (13.3)   | 335 (13.0)   | 57 (6.2)    | 67 (6.8)    | 874 (19.5)   | 856 (18.6)   | 17 (10.4)              | 18 (11.3)   | 174 (9.3)               | 154 (8.9)    |
| History of CV disease, present, n (%)         | 2979 (45.7)  | 2956 (45.4)  | 1127 (38.1)  | 1061 (36.2)  | 1330 (50.5)  | 1337 (51.7)  | 522 (56.4)  | 558 (56.4)  | 2152 (48.0)  | 2222 (48.2)  | 36 (22.1)              | 20 (12.5)   | 791 (42.2)              | 714 (41.0)   |
| History of heart failure                      | 485 (7.4)    | 522 (8.0)    | 211 (7.1)    | 202 (6.9)    | 192 (7.3)    | 240 (9.3)    | 82 (8.9)    | 80 (8.1)    | 302 (6.7)    | 328 (7.1)    | 11 (6.7)               | 11 (6.9)    | 172 (9.2)               | 183 (10.5)   |
| History of atrial fibrillation/atrial flutter | 568 (8.7)    | 538 (8.3)    | 144 (4.9)    | 122 (4.2)    | 280 (10.6)   | 267 (10.3)   | 144 (15.6)  | 149 (15.1)  | 439 (9.8)    | 428 (9.3)    | 0                      | 0           | 129 (6.9)               | 110 (6.3)    |
| Baseline medications, n (%) <sup>d</sup>      |              |              |              |              |              |              |             |             |              |              |                        |             |                         |              |
| RAS inhibitors (ACEis/ARBs)                   | 6508 (99.8)  | 6495 (99.8)  | 2951 (99.8)  | 2925 (99.8)  | 2631 (99.8)  | 2582 (99.8)  | 926 (100.0) | 988 (99.8)  | 4473 (99.8)  | 4596 (99.8)  | 163 (100.0)            | 160 (100.0) | 1872 (99.8)             | 1739 (>99.9) |
| Beta-blockers                                 | 3236 (49.6)  | 3268 (50.2)  | 1311 (44.3)  | 1308 (44.6)  | 1419 (53.9)  | 1430 (55.3)  | 506 (54.6)  | 530 (53.5)  | 2237 (49.9)  | 2308 (50.1)  | 57 (35.0)              | 54 (33.8)   | 942 (50.2)              | 906 (52.1)   |
| Diuretics                                     | 3325 (51.0)  | 3385 (52.0)  | 1378 (46.6)  | 1412 (48.2)  | 1412 (53.6)  | 1401 (54.2)  | 535 (57.8)  | 572 (57.8)  | 2320 (51.8)  | 2386 (51.8)  | 67 (41.1)              | 70 (43.8)   | 938 (50.0)              | 929 (53.4)   |
| Statins                                       | 4657 (71.4)  | 4742 (72.9)  | 1993 (67.4)  | 2040 (69.6)  | 1975 (75.0)  | 1945 (75.2)  | 689 (74.4)  | 757 (76.5)  | 3291 (73.4)  | 3405 (73.9)  | 93 (57.1)              | 110 (68.8)  | 1273 (67.9)             | 1227 (70.5)  |
| Calcium channel blockers                      | 3664 (56.2)  | 3694 (56.8)  | 1564 (52.9)  | 1563 (53.3)  | 1544 (58.6)  | 1508 (58.3)  | 556 (60.0)  | 623 (62.9)  | 2554 (57.0)  | 2654 (57.6)  | 74 (45.4%)             | 75 (46.9)   | 1036 (55.3)             | 965 (55.5)   |
| ≥1 glucose-lowering medication                | 6354 (97.5)  | 6366 (97.8)  | 2898 (98.0)  | 2881 (98.3)  | 2574 (97.7)  | 2537 (98.1)  | 882 (95.2)  | 948 (95.8)  | 4361 (97.3)  | 4499 (97.7)  | 161 (98.8)             | 156 (97.5)  | 1832 (97.7)             | 1711 (98.3)  |

| n (%)              | All             |                 | Age             |                 |                 |                 |                |                | Sex             |                 |                        |                |                         |                 |
|--------------------|-----------------|-----------------|-----------------|-----------------|-----------------|-----------------|----------------|----------------|-----------------|-----------------|------------------------|----------------|-------------------------|-----------------|
|                    |                 |                 | <65 Years       |                 | 65–74 Years     |                 | ≥75 Years      |                | Male            |                 | Female (Premenopausal) |                | Female (Postmenopausal) |                 |
|                    | FIN<br>(n=6519) | PBO<br>(n=6507) | FIN<br>(n=2958) | PBO<br>(n=2931) | FIN<br>(n=2635) | PBO<br>(n=2586) | FIN<br>(n=926) | PBO<br>(n=990) | FIN<br>(n=4481) | PBO<br>(n=4607) | FIN<br>(n=163)         | PBO<br>(n=160) | FIN<br>(n=1875)         | PBO<br>(n=1740) |
| n (%) <sup>d</sup> |                 |                 |                 |                 |                 |                 |                |                |                 |                 |                        |                |                         |                 |
| Insulin            | 3866<br>(59.3)  | 3764<br>(57.8)  | 1848<br>(62.5)  | 1789<br>(61.0)  | 1539<br>(58.4)  | 1481<br>(57.3)  | 479<br>(51.7)  | 494<br>(49.9)  | 2598<br>(58.0)  | 2605<br>(56.5)  | 94<br>(57.7)           | 99<br>(61.9)   | 1174<br>(62.6)          | 1060<br>(60.9)  |
| GLP-1RA            | 497<br>(7.6)    | 447<br>(6.9)    | 273<br>(9.2)    | 219<br>(7.5)    | 190<br>(7.2)    | 188<br>(7.3)    | 34<br>(3.7)    | 40<br>(4.0)    | 359<br>(8.0)    | 317<br>(6.9)    | 12<br>(7.4)            | 18<br>(11.3)   | 126<br>(6.7)            | 112<br>(6.4)    |
| SGLT-2i            | 438<br>(6.7)    | 439<br>(6.7)    | 251<br>(8.5)    | 266<br>(9.1)    | 149<br>(5.7)    | 140<br>(5.4)    | 38<br>(4.1)    | 33<br>(3.3)    | 331<br>(7.4)    | 340<br>(7.4)    | 19<br>(11.7)           | 17<br>(10.6)   | 88<br>(4.7)             | 82<br>(4.7)     |

ACEi = angiotensin-converting enzyme inhibitor; ARB = angiotensin receptor blocker; BMI = body mass index; CV = cardiovascular; eGFR = estimated

glomerular filtration rate; FIN = finerenone; GLP-1RA = glucagon-like peptide-1 receptor agonist; HbA1c = glycated hemoglobin; PBO = placebo; Q = quartile;

RAS = renin-angiotensin system; SD = standard deviation; SGLT-2i = sodium-glucose co-transporter-2 inhibitor; UACR = urine albumin-to-creatinine ratio.

Values are based on available data.

<sup>a</sup> Other: included American Indian/Alaska Native, Native Hawaiian/other Pacific, not reported, multiple.

<sup>b</sup> Missing (eGFR): <65 years, *n*=2; 65 to 74 years, *n*=1; postmenopausal female, *n*=3.

<sup>c</sup> Missing (UACR): <65 years, *n*=4; 65 to 74 years, *n*=1; male, *n*=2; postmenopausal female, *n*=3.

<sup>d</sup> Analysis allowed multiple drug groups for the same drug.

**eTable 2.** Treatment-Emergent AEs According to Age and Sex

| n (%)                                                      | ALL          |              | Age          |              |              |              |             |             | Sex          |              |                        |             |                         |              |
|------------------------------------------------------------|--------------|--------------|--------------|--------------|--------------|--------------|-------------|-------------|--------------|--------------|------------------------|-------------|-------------------------|--------------|
|                                                            |              |              | <65 Years    |              | 65–74 Years  |              | ≥75 Years   |             | Male         |              | Female (Premenopausal) |             | Female (Postmenopausal) |              |
|                                                            | FIN (n=6510) | PBO (n=6489) | FIN (n=2953) | PBO (n=2926) | FIN (n=2631) | PBO (n=2578) | FIN (n=926) | PBO (n=985) | FIN (n=4476) | PBO (n=4595) | FIN (n=163)            | PBO (n=160) | FIN (n=1871)            | PBO (n=1734) |
| Any AE                                                     | 5602 (86.1)  | 5607 (86.4)  | 2494 (84.5)  | 2523 (86.2)  | 2301 (87.5)  | 2225 (86.3)  | 807 (87.1)  | 859 (87.2)  | 3899 (87.1)  | 4011 (87.3)  | 137 (84.0)             | 138 (86.3)  | 1566 (83.7)             | 1458 (84.1)  |
| Related to study drug                                      | 1206 (18.5)  | 862 (13.3)   | 478 (16.2)   | 384 (13.1)   | 558 (21.2)   | 337 (13.1)   | 170 (18.4)  | 141 (14.3)  | 884 (19.7)   | 612 (13.3)   | 21 (12.9)              | 20 (12.5)   | 301 (16.1)              | 230 (13.3)   |
| Leading to discontinuation                                 | 414 (6.4)    | 351 (5.4)    | 128 (4.3)    | 124 (4.2)    | 212 (8.1)    | 153 (5.9)    | 74 (8.0)    | 74 (7.5)    | 313 (7.0)    | 249 (5.4)    | 9 (5.5)                | 7 (4.4)     | 92 (4.9)                | 95 (5.5)     |
| Any SAE                                                    | 2060 (31.6)  | 2186 (33.7)  | 856 (29.0)   | 938 (32.1)   | 871 (33.1)   | 876 (34.0)   | 333 (36.0)  | 372 (37.8)  | 1487 (33.2)  | 1590 (34.6)  | 33 (20.2)              | 42 (26.3)   | 540 (28.9)              | 554 (31.9)   |
| Related to study drug                                      | 83 (1.3)     | 61 (0.9)     | 29 (1.0)     | 27 (0.9)     | 39 (1.5)     | 17 (0.7)     | 15 (1.6)    | 17 (1.7)    | 56 (1.3)     | 46 (1.0)     | 0                      | 1 (0.6)     | 27 (1.4)                | 14 (0.8)     |
| Leading to discontinuation                                 | 145 (2.2)    | 154 (2.4)    | 41 (1.4)     | 48 (1.6)     | 75 (2.9)     | 71 (2.8)     | 29 (3.1)    | 35 (3.6)    | 115 (2.6)    | 112 (2.4)    | 1 (0.6)                | 2 (1.3)     | 29 (1.5)                | 40 (2.3)     |
| Any AE leading to death                                    | 110 (1.7)    | 151 (2.3)    | 43 (1.5)     | 55 (1.9)     | 42 (1.6)     | 62 (2.4)     | 25 (2.7)    | 34 (3.5)    | 73 (1.6)     | 115 (2.5)    | 0                      | 3 (1.9)     | 37 (2.0)                | 33 (1.9)     |
| <b>AEs of interest</b>                                     |              |              |              |              |              |              |             |             |              |              |                        |             |                         |              |
| Hypotension                                                | 282(4.3)     | 177 (2.7)    | 101 (3.4)    | 70 (2.4)     | 127 (4.8)    | 76 (2.9)     | 54 (5.8)    | 31 (3.1)    | 216 (4.8)    | 131 (2.9)    | 3 (1.8)                | 0           | 63 (3.4)                | 46 (2.7)     |
| Orthostatic hypotension                                    | 46 (0.7)     | 39 (0.6)     | 18 (0.6)     | 15 (0.5)     | 23 (0.9)     | 15 (0.6)     | 5 (0.5)     | 9 (0.9)     | 34 (0.8)     | 30 (0.7)     | 0                      | 2 (1.3)     | 12 (0.6)                | 7 (0.4)      |
| Hyperkalemia                                               | 912 (14.0)   | 448 (6.9)    | 360 (12.2)   | 238 (8.1)    | 420 (16.0)   | 158 (6.1)    | 132 (14.3)  | 52 (5.3)    | 647 (14.5)   | 304 (6.6)    | 14 (8.6)               | 16 (10.0)   | 251 (13.4)              | 128 (7.4)    |
| Leading to permanent discontinuation                       | 110 (1.7)    | 38 (0.6)     | 31 (1.0)     | 13 (0.4)     | 54 (2.1)     | 19 (0.7)     | 25 (2.7)    | 6 (0.6)     | 83 (1.9)     | 28 (0.6)     | 4 (2.5)                | 1 (0.6)     | 23 (1.2)                | 9 (0.5)      |
| Classified as a serious AE                                 | 69 (1.1)     | 16 (0.2)     | 28 (0.9)     | 8 (0.3)      | 29 (1.1)     | 5 (0.2)      | 12 (1.3)    | 3 (0.3)     | 45 (1.0)     | 9 (0.2)      | 1 (0.6)                | 0           | 23 (1.2)                | 7 (0.4)      |
| Leading to hospitalization                                 | 61 (0.9)     | 10 (0.2)     | 26 (0.9)     | 6 (0.2)      | 25 (1.0)     | 2 (<0.1)     | 10 (1.1)    | 2 (0.2)     | 38 (0.8)     | 5 (0.1)      | 1 (0.6)                | 0           | 22 (1.2)                | 5 (0.3)      |
| Gynecomastia                                               | 8 (0.1)      | 11 (0.2)     | 2 (<0.1)     | 4 (0.1)      | 5 (0.2)      | 3 (0.1)      | 1 (0.1)     | 4 (0.4)     | 8 (0.2)      | 11 (0.2)     | NA                     | NA          | NA                      | NA           |
| <b>Central laboratory assessments, n/N (%)<sup>a</sup></b> |              |              |              |              |              |              |             |             |              |              |                        |             |                         |              |

6



|                             |                  |                |                 |                |                 |                |                |              |                 |                |               |             |                 |                |
|-----------------------------|------------------|----------------|-----------------|----------------|-----------------|----------------|----------------|--------------|-----------------|----------------|---------------|-------------|-----------------|----------------|
| Serum potassium >5.5 mmol/L | 1075/6402 (16.8) | 470/6370 (7.4) | 444/2904 (15.3) | 233/2871 (8.1) | 460/2585 (17.8) | 180/2529 (7.1) | 171/913 (18.7) | 57/970 (5.9) | 720/4403 (16.4) | 308/4523 (6.8) | 16/159 (10.1) | 8/154 (5.2) | 339/1840 (18.4) | 154/1693 (9.1) |
| Serum potassium >6.0 mmol/L | 211/6439 (3.3)   | 80/6413 (1.2)  | 90/2926 (3.1)   | 44/2896 (1.5)  | 89/2598 (3.4)   | 31/2544 (1.2)  | 32/915 (3.5)   | 5/973 (0.5)  | 143/4428 (3.2)  | 48/4544 (1.1)  | 4/160 (2.5)   | 1/156 (0.6) | 64/1851 (3.5)   | 31/1713 (1.8)  |

AE = adverse event; FIN = finerenone; NA = not applicable; PBO = placebo; SAE = serious adverse event.

<sup>a</sup> The “*n*” numerator represents the number of patients at risk with  $\geq 1$  treatment-emergent laboratory assessment meeting the criterion. The “*N*” denominator represents all patients at risk for a treatment-emergent laboratory abnormality. Patients had both a baseline and postbaseline treatment-emergent value while the baseline value did not exceed the displayed threshold.

**eFigure 1.** Analysis of CV composite outcome and subcomponents according to (A) age and (B) sex.

**A.**

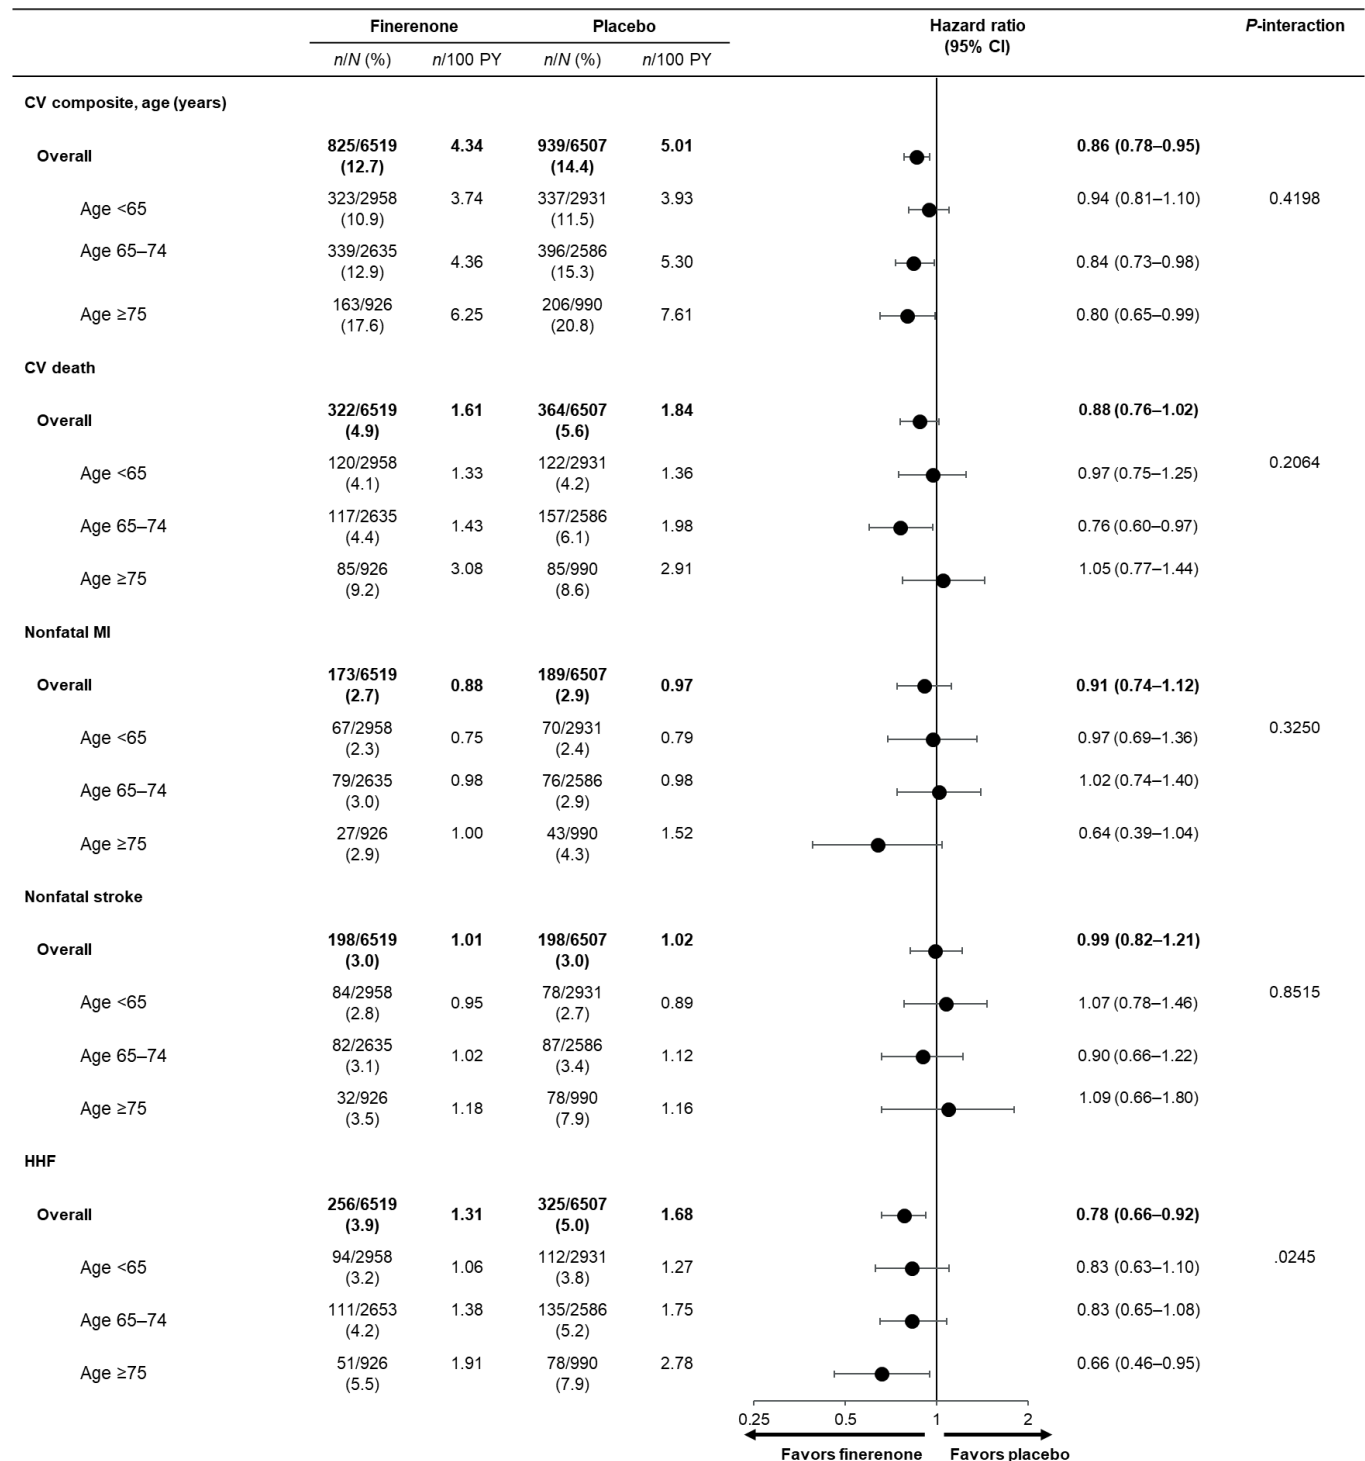

**B.**

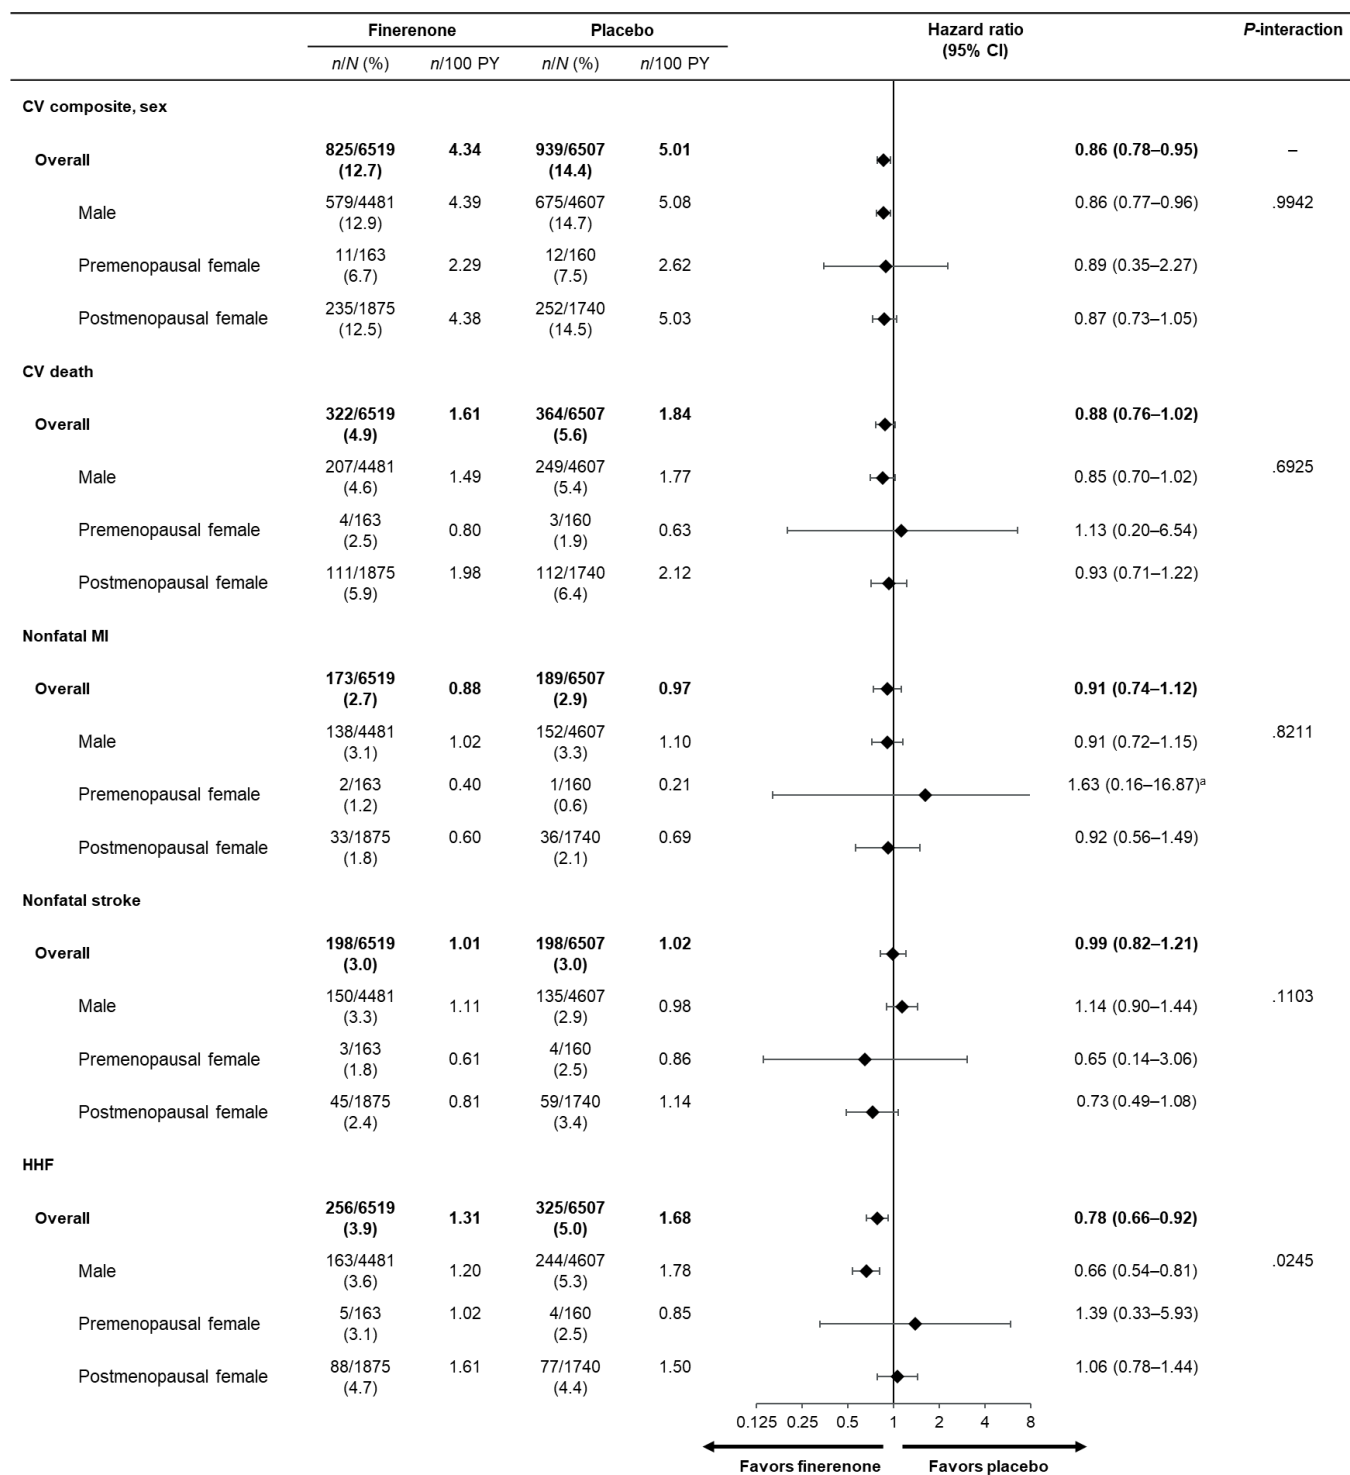

1  
2  
3 A stratified Cox proportional hazards model including treatment was calculated separately by  
4 subgroup category. The  $P_{\text{interaction}}$  is based on a stratified Cox proportional hazards model including  
5 treatment, subgroup, and treatment by subgroup interaction.  
6  
7

8 CV composite outcome includes CV death, nonfatal MI, nonfatal stroke, or HHF.

9  
10 CI = confidence interval; CV = cardiovascular; HHF = hospitalization for heart failure; MI = myocardial  
11 infarction; PY = patient-years.  
12  
13

14  
15  
16 <sup>a</sup> An unstratified model using Firth's penalized likelihood approach was applied due to zero cell counts  
17 and/or convergence issues.  
18  
19

**eFigure 2.** Hazard ratio (finerenone vs placebo) as a function of age modeled with cubic splines for CV composite outcome by age (A), spline for hazard ratio of CV composite outcomes by sex (B, C), and age distribution by sex (D).

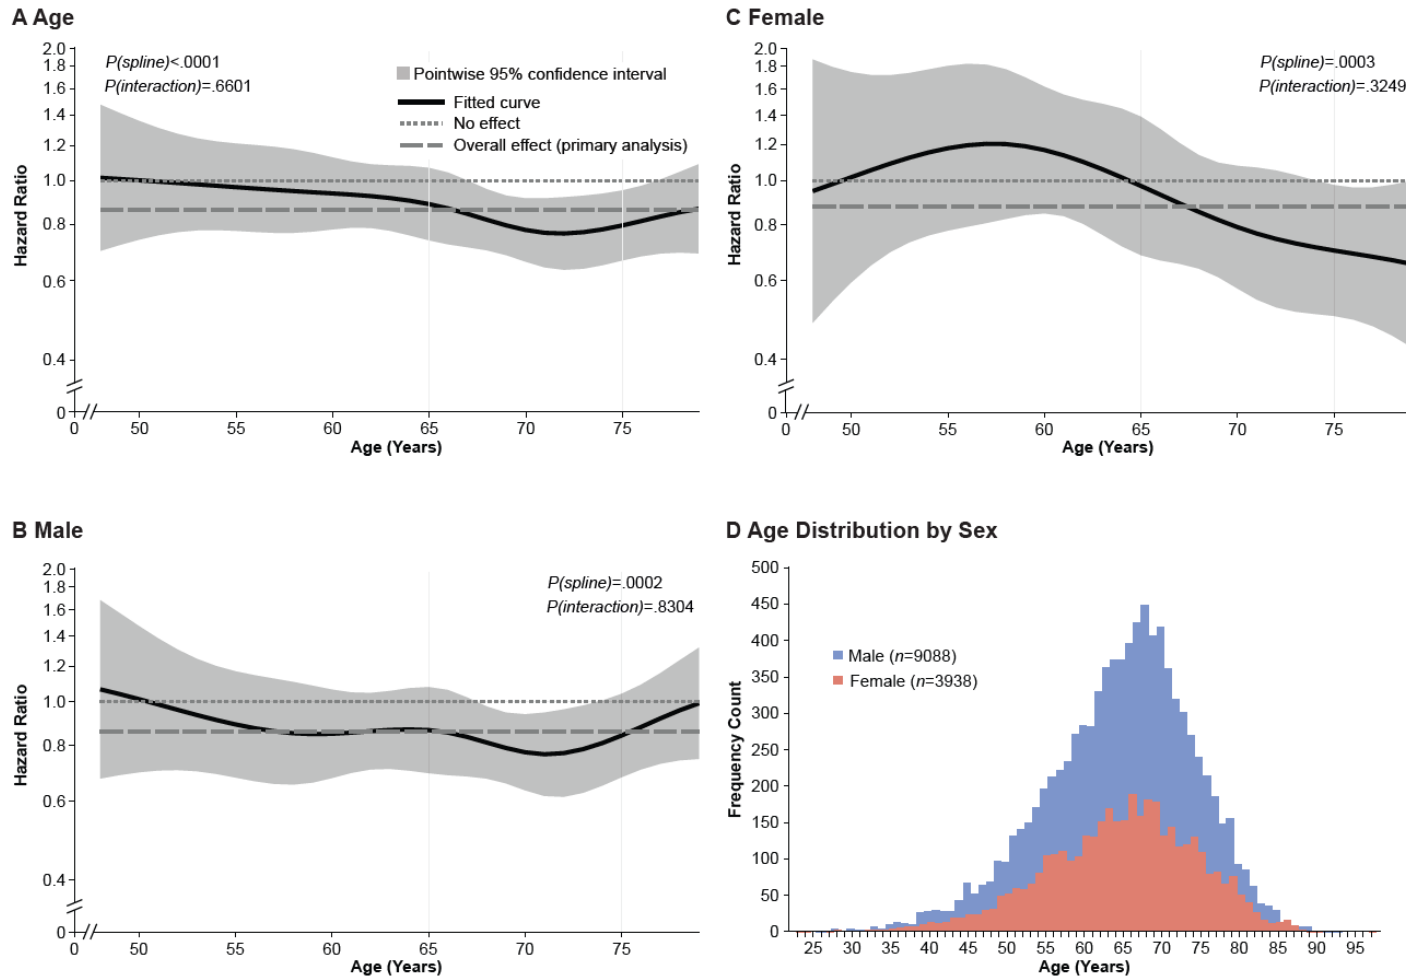

CV = cardiovascular.

1  
2  
3  
4  
5  
6  
7  
8  
9  
10  
11  
12  
13  
14  
15  
16  
17  
18  
19  
20  
21  
22  
23  
24  
25  
26  
27  
28  
29  
30  
31  
32  
33  
34  
35  
36  
37  
38  
39  
40  
41  
42  
43  
44  
45  
46

**eFigure 3.** Hazard ratio (finerenone vs placebo) as a function of age modeled with cubic splines for kidney composite outcome by age (A), spline for hazard ratio of kidney composite outcomes by sex (B, C), and age distribution by sex (D).

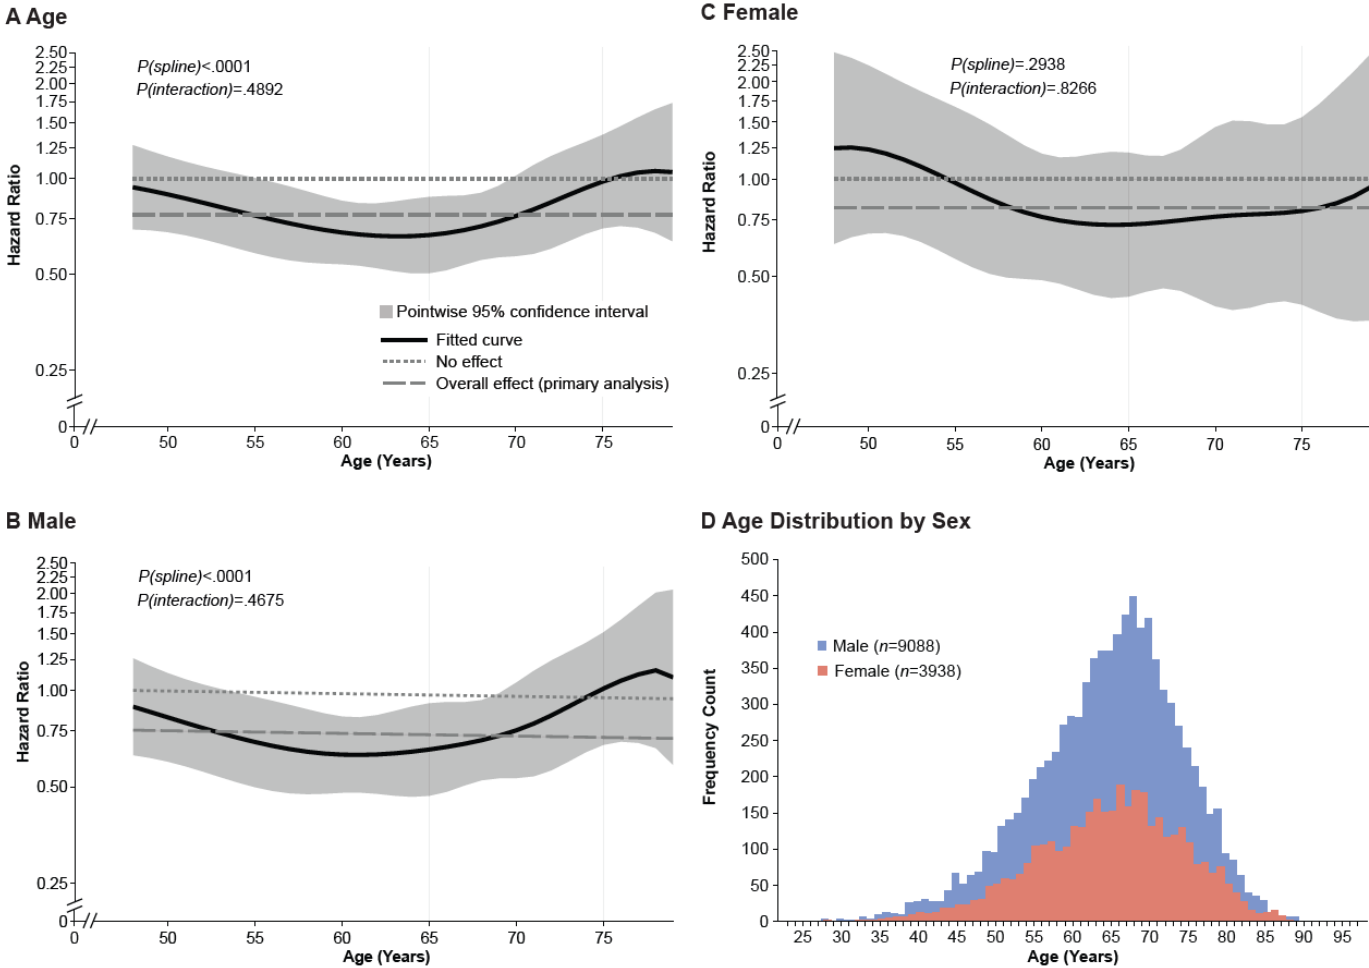

**eFigure 4.** LS mean change in eGFR from baseline, chronic, and total slopes over time by sex.

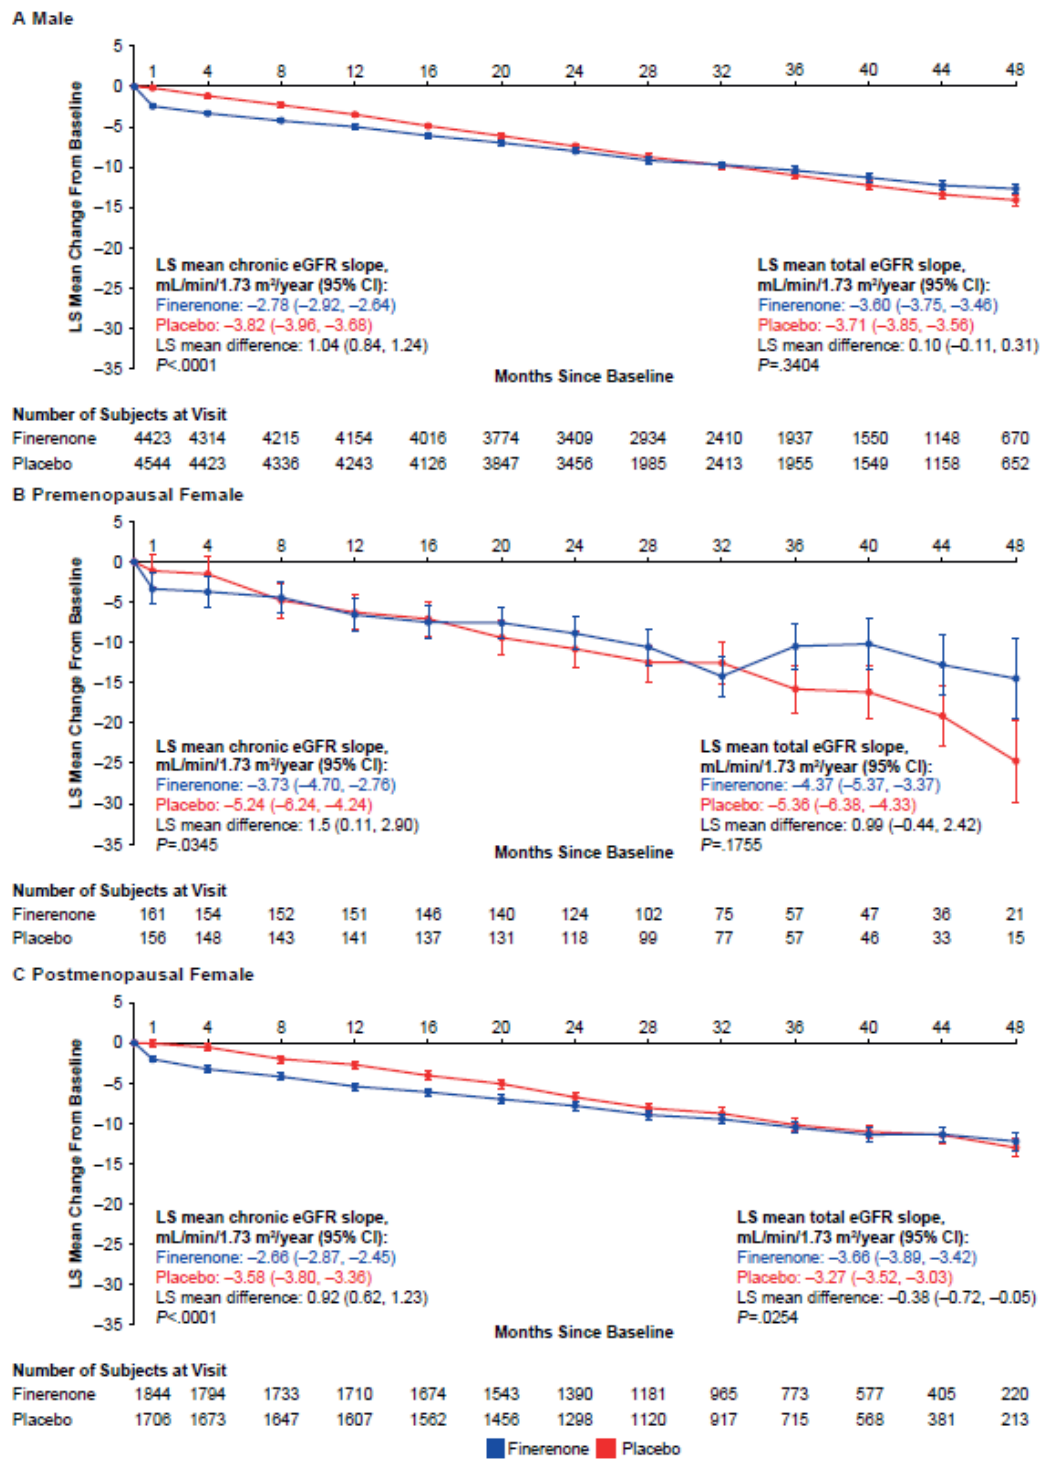

Chronic eGFR slope from month 4 to end-of-study visit.

CI = confidence interval; eGFR = estimated glomerular filtration rate; LS = least-squares.

**eFigure 5.** LS mean ratio to baseline UACR over time by age and sex

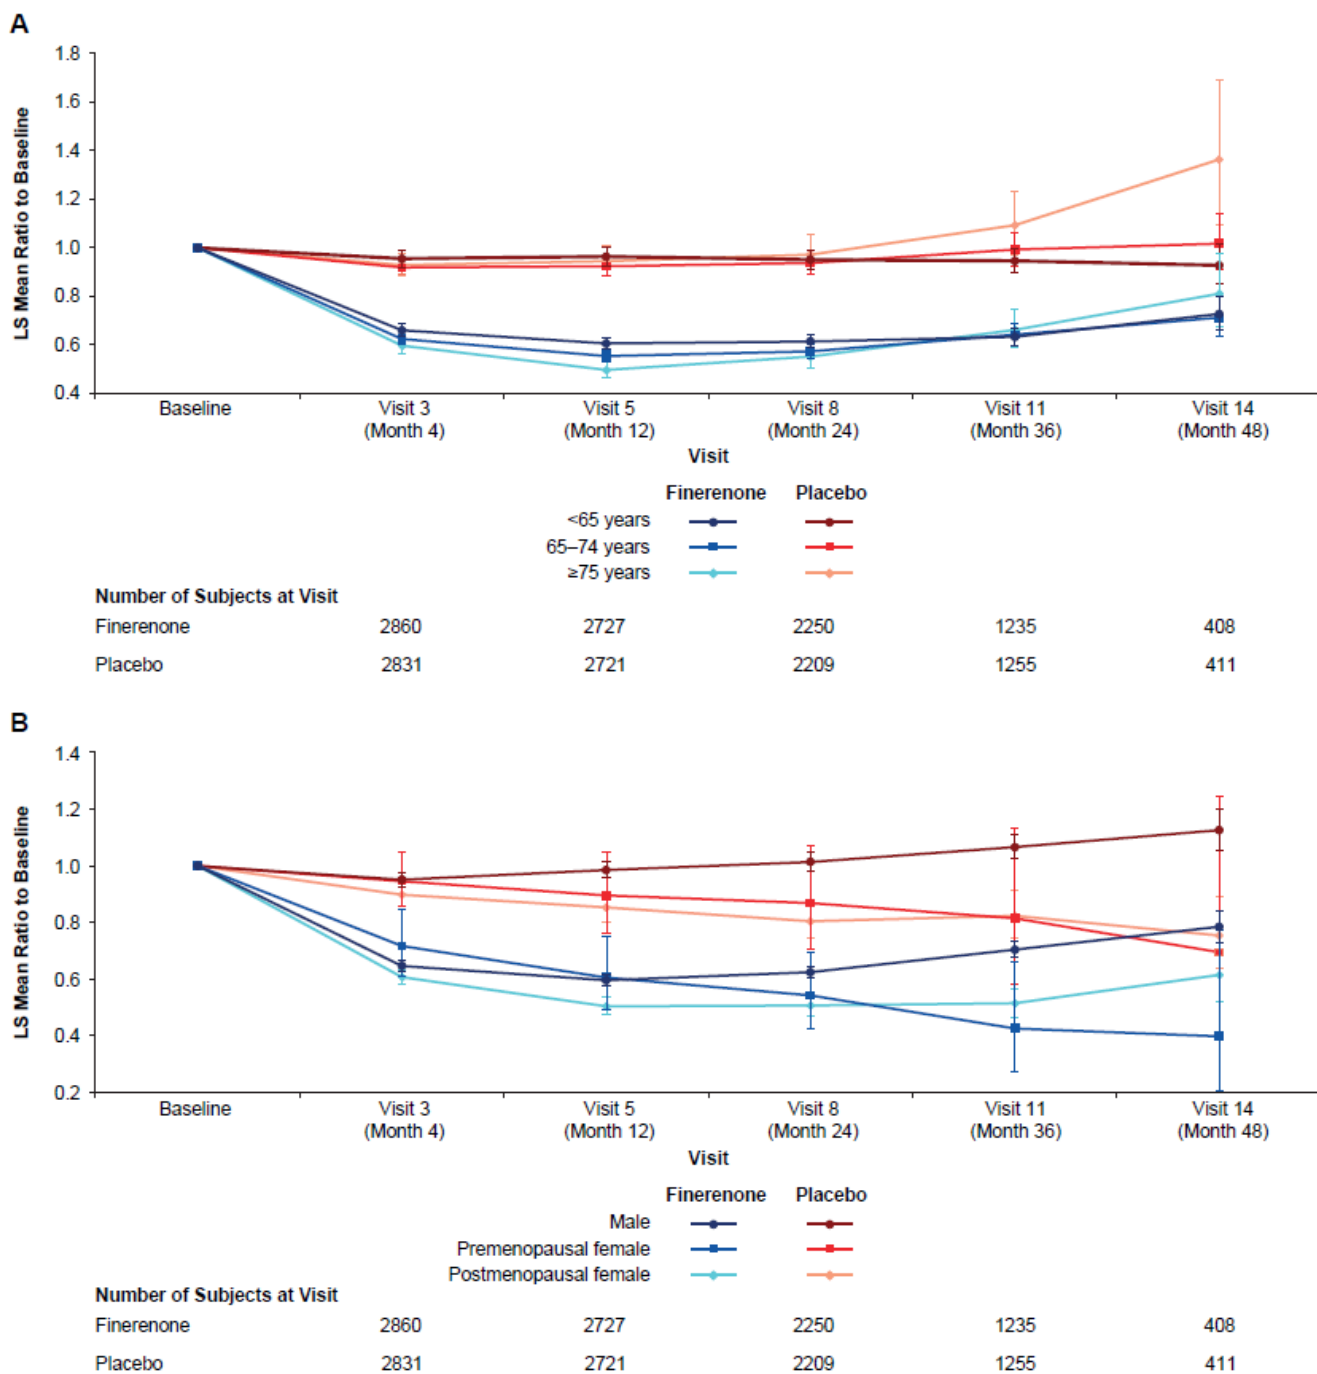

LS = least-squares; UACR = urine albumin-to-creatinine ratio.



**eFigure 6.** Relative risk of treatment-emergent hyperkalemia causing permanent discontinuation of study drug by age and sex

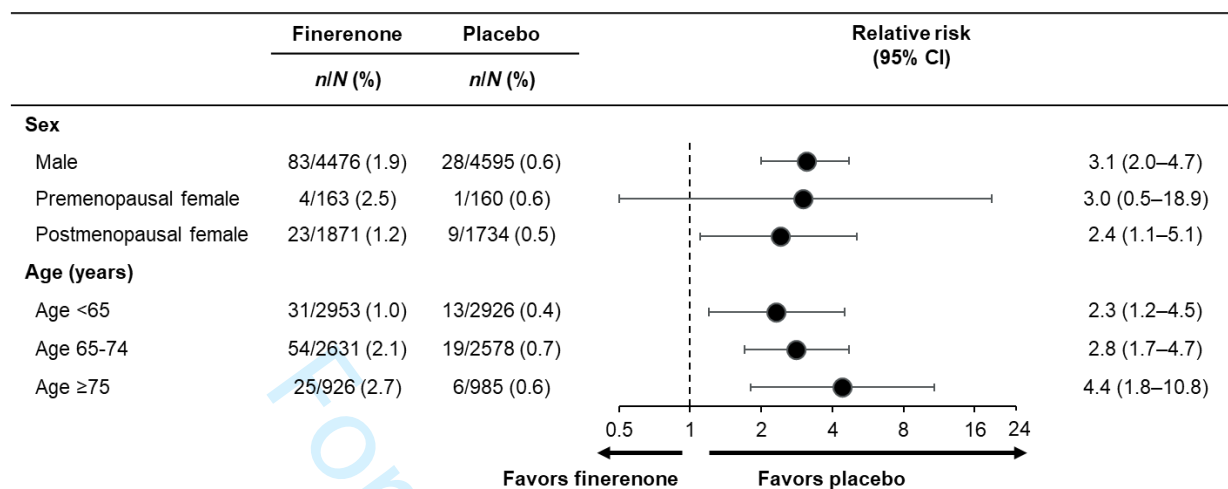

Relative risk values based on Mantel-Haenszel estimates (stratified by study). For the relative risk, a treatment-arm-size zero cell correction with zero term = 0.5 was applied.

**eFigure 7.** FIDELITY CONSORT diagram.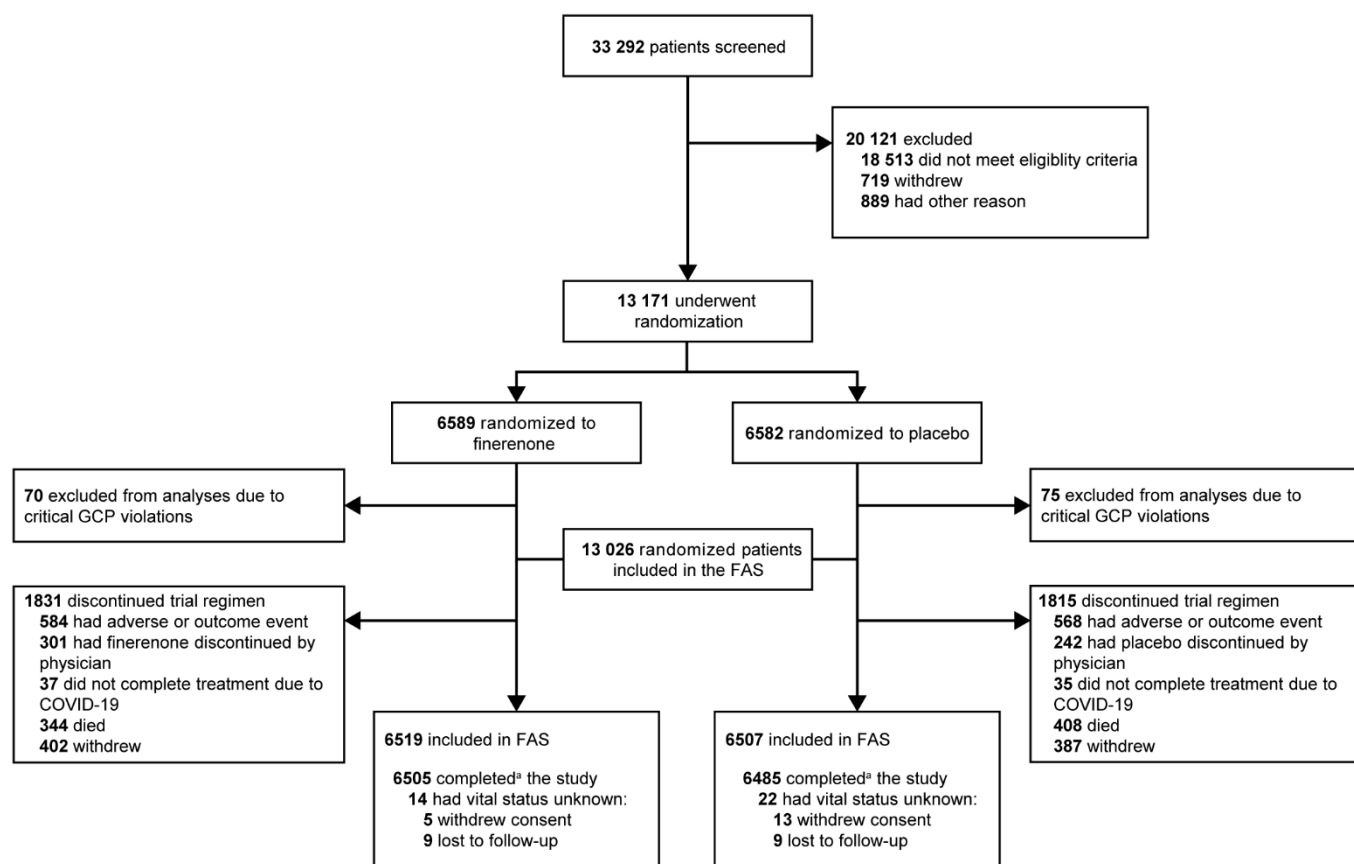

<sup>a</sup> The patient was considered as having completed the study if there was a contact with the patient after the end-of-study notification or if the patient died.

CONSORT = Consolidated Standards of Reporting Trials; COVID-19, coronavirus disease of 2019;

FAS, full analysis set; FIDELITY = The Finerenone in chronic kidney disease and type 2 diabetes:

Combined FIDELIO-DKD and FIGARO-DKD Trial programme analysis; GCP, Good Clinical Practice.

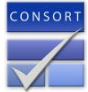

## CONSORT 2010 checklist of information to include when reporting a randomised trial\*

| Section/Topic             | Item No | Checklist item                                                                                                                        | Reported on page No                                |
|---------------------------|---------|---------------------------------------------------------------------------------------------------------------------------------------|----------------------------------------------------|
| <b>Title and abstract</b> |         |                                                                                                                                       |                                                    |
|                           | 1a      | Identification as a randomised trial in the title                                                                                     | 1 – Post hoc analysis of a previously reported RCT |
|                           | 1b      | Structured summary of trial design, methods, results, and conclusions (for specific guidance see CONSORT for abstracts)               | 3-4                                                |
| <b>Introduction</b>       |         |                                                                                                                                       |                                                    |
| Background and objectives | 2a      | Scientific background and explanation of rationale                                                                                    | 5-6                                                |
|                           | 2b      | Specific objectives or hypotheses                                                                                                     | 6                                                  |
| <b>Methods</b>            |         |                                                                                                                                       |                                                    |
| Trial design              | 3a      | Description of trial design (such as parallel, factorial) including allocation ratio                                                  | 6-7                                                |
|                           | 3b      | Important changes to methods after trial commencement (such as eligibility criteria), with reasons                                    | 6                                                  |
| Participants              | 4a      | Eligibility criteria for participants                                                                                                 | 6                                                  |
|                           | 4b      | Settings and locations where the data were collected                                                                                  | Reported previously                                |
| Interventions             | 5       | The interventions for each group with sufficient details to allow replication, including how and when they were actually administered | 6-7                                                |
| Outcomes                  | 6a      | Completely defined pre-specified primary and secondary outcome measures, including how and when they were assessed                    | 7                                                  |
|                           | 6b      | Any changes to trial outcomes after the trial commenced, with reasons                                                                 | N/A                                                |
| Sample size               | 7a      | How sample size was determined                                                                                                        | Reported previously                                |
|                           | 7b      | When applicable, explanation of any interim analyses and stopping guidelines                                                          | Reported previously                                |
| Randomisation:            |         |                                                                                                                                       |                                                    |
| Sequence generation       | 8a      | Method used to generate the random allocation sequence                                                                                | Reported previously                                |

|    |                     |     |                                                                                                                                                   |                     |
|----|---------------------|-----|---------------------------------------------------------------------------------------------------------------------------------------------------|---------------------|
| 1  |                     | 8b  | Type of randomisation; details of any restriction (such as blocking and block size)                                                               | Reported previously |
| 2  |                     |     |                                                                                                                                                   |                     |
| 3  | Allocation          | 9   | Mechanism used to implement the random allocation sequence (such as sequentially numbered containers),                                            | Reported previously |
| 4  | concealment         |     | describing any steps taken to conceal the sequence until interventions were assigned                                                              | Reported previously |
| 5  | mechanism           |     |                                                                                                                                                   |                     |
| 6  |                     |     |                                                                                                                                                   |                     |
| 7  | Implementation      | 10  | Who generated the random allocation sequence, who enrolled participants, and who assigned participants to interventions                           | Reported previously |
| 8  |                     |     |                                                                                                                                                   |                     |
| 9  | Blinding            | 11a | If done, who was blinded after assignment to interventions (for example, participants, care providers, those assessing outcomes) and how          | Reported previously |
| 10 |                     |     |                                                                                                                                                   |                     |
| 11 |                     | 11b | If relevant, description of the similarity of interventions                                                                                       | Reported previously |
| 12 |                     |     |                                                                                                                                                   |                     |
| 13 |                     |     |                                                                                                                                                   |                     |
| 14 | Statistical methods | 12a | Statistical methods used to compare groups for primary and secondary outcomes                                                                     | 7-8                 |
| 15 |                     | 12b | Methods for additional analyses, such as subgroup analyses and adjusted analyses                                                                  | 7-8                 |
| 16 |                     |     |                                                                                                                                                   |                     |
| 17 | <b>Results</b>      |     |                                                                                                                                                   |                     |
| 18 | Participant flow (a | 13a | For each group, the numbers of participants who were randomly assigned, received intended treatment, and                                          | 8-11; eTable 1      |
| 19 | diagram is strongly |     | were analysed for the primary outcome                                                                                                             |                     |
| 20 | recommended)        | 13b | For each group, losses and exclusions after randomisation, together with reasons                                                                  | eFigure 7           |
| 21 | Recruitment         | 14a | Dates defining the periods of recruitment and follow-up                                                                                           | Reported previously |
| 22 |                     |     |                                                                                                                                                   |                     |
| 23 |                     | 14b | Why the trial ended or was stopped                                                                                                                | Reported previously |
| 24 |                     |     |                                                                                                                                                   |                     |
| 25 |                     |     |                                                                                                                                                   |                     |
| 26 |                     |     |                                                                                                                                                   |                     |
| 27 | Baseline data       | 15  | A table showing baseline demographic and clinical characteristics for each group                                                                  | Table 1; eTable 1   |
| 28 |                     |     |                                                                                                                                                   |                     |
| 29 |                     |     |                                                                                                                                                   |                     |
| 30 | Numbers analysed    | 16  | For each group, number of participants (denominator) included in each analysis and whether the analysis was by original assigned groups           | 8-11; eTable 1      |
| 31 |                     |     |                                                                                                                                                   |                     |
| 32 | Outcomes and        | 17a | For each primary and secondary outcome, results for each group, and the estimated effect size and its precision (such as 95% confidence interval) | 12-13               |
| 33 | estimation          |     |                                                                                                                                                   | Figures 1-2         |
| 34 |                     |     |                                                                                                                                                   | eFigure 1           |
| 35 |                     |     |                                                                                                                                                   |                     |
| 36 |                     | 17b | For binary outcomes, presentation of both absolute and relative effect sizes is recommended                                                       | N/A                 |
| 37 | Ancillary analyses  | 18  | Results of any other analyses performed, including subgroup analyses and adjusted analyses, distinguishing pre-specified from exploratory         | eFigures 2-5        |
| 38 |                     |     |                                                                                                                                                   |                     |
| 39 |                     |     |                                                                                                                                                   |                     |
| 40 | Harms               | 19  | All important harms or unintended effects in each group (for specific guidance see CONSORT for harms)                                             | 14-15               |
| 41 |                     |     |                                                                                                                                                   |                     |
| 42 |                     |     |                                                                                                                                                   |                     |

**Discussion**

|    |                          |    |                                                                                                                  |               |
|----|--------------------------|----|------------------------------------------------------------------------------------------------------------------|---------------|
| 1  |                          |    |                                                                                                                  |               |
| 2  | Limitations              | 20 | Trial limitations, addressing sources of potential bias, imprecision, and, if relevant, multiplicity of analyses | 17            |
| 3  | Generalisability         | 21 | Generalisability (external validity, applicability) of the trial findings                                        | Reported      |
| 4  |                          |    |                                                                                                                  | previously    |
| 5  |                          |    |                                                                                                                  | 15-18         |
| 6  | Interpretation           | 22 | Interpretation consistent with results, balancing benefits and harms, and considering other relevant evidence    |               |
| 7  | <b>Other information</b> |    |                                                                                                                  |               |
| 8  | Registration             | 23 | Registration number and name of trial registry                                                                   | 4             |
| 9  | Protocol                 | 24 | Where the full trial protocol can be accessed, if available                                                      | Primary       |
| 10 |                          |    |                                                                                                                  | publications  |
| 11 |                          |    |                                                                                                                  | with full     |
| 12 |                          |    |                                                                                                                  | protocols are |
| 13 |                          |    |                                                                                                                  | cited (6)     |
| 14 |                          |    |                                                                                                                  | 19-20         |
| 15 |                          |    |                                                                                                                  |               |
| 16 | Funding                  | 25 | Sources of funding and other support (such as supply of drugs), role of funders                                  |               |
| 17 |                          |    |                                                                                                                  |               |

18

19 \*We strongly recommend reading this statement in conjunction with the CONSORT 2010 Explanation and Elaboration for important clarifications on all the items. If relevant, we also

20 recommend reading CONSORT extensions for cluster randomised trials, non-inferiority and equivalence trials, non-pharmacological treatments, herbal interventions, and pragmatic trials.

21 Additional extensions are forthcoming: for those and for up to date references relevant to this checklist, see [www.consort-statement.org](http://www.consort-statement.org).

22

23

24

25

26

27

28

29

30

31

32

33

34

35

36

37

38

39

40

41

42

# BMJ Open

## Finerenone Cardiovascular and Kidney Outcomes by Age and Sex: FIDELITY Post Hoc Analysis of Two Phase 3, Multicenter, Double-Blind Trials

|                                 |                                                                                                                                                                                                                                                                                                                                                                                                                                                                                                                                                                                                                                                                                                                                                                                                                                                                                                                                                                                                                                                                                            |
|---------------------------------|--------------------------------------------------------------------------------------------------------------------------------------------------------------------------------------------------------------------------------------------------------------------------------------------------------------------------------------------------------------------------------------------------------------------------------------------------------------------------------------------------------------------------------------------------------------------------------------------------------------------------------------------------------------------------------------------------------------------------------------------------------------------------------------------------------------------------------------------------------------------------------------------------------------------------------------------------------------------------------------------------------------------------------------------------------------------------------------------|
| Journal:                        | <i>BMJ Open</i>                                                                                                                                                                                                                                                                                                                                                                                                                                                                                                                                                                                                                                                                                                                                                                                                                                                                                                                                                                                                                                                                            |
| Manuscript ID                   | bmjopen-2023-076444.R2                                                                                                                                                                                                                                                                                                                                                                                                                                                                                                                                                                                                                                                                                                                                                                                                                                                                                                                                                                                                                                                                     |
| Article Type:                   | Original research                                                                                                                                                                                                                                                                                                                                                                                                                                                                                                                                                                                                                                                                                                                                                                                                                                                                                                                                                                                                                                                                          |
| Date Submitted by the Author:   | 16-Feb-2024                                                                                                                                                                                                                                                                                                                                                                                                                                                                                                                                                                                                                                                                                                                                                                                                                                                                                                                                                                                                                                                                                |
| Complete List of Authors:       | Bansal, Shweta ; The University of Texas Health Science Center at San Antonio, Department of Medicine<br>Canziani, M. E. F.; Univ Fed Sao Paulo<br>Birne, Rita; Centro Hospitalar Lisboa Ocidental, Department of Nephrology; University of Lisbon, Nova Medical School<br>Anker, Stefan; Charité Universitätsmedizin, Department of Cardiology (CVK) of German Heart Center Charité; Institute of Health Center for Regenerative Therapies (BCRT)<br>Bakris, George; University of Chicago, Hypertension Center<br>Filippatos, Gerasimos; National and Kapodistrian University of Athens<br>Rossing, Peter; Steno Diabetes Center AS; University of Copenhagen, Department of Clinical Medicine<br>Ruilope, Luis M ; Institute of Research imas12, Cardiorenal Translational Laboratory and Hypertension Unit; Hospital Universitario 12 de Octubre, CIBER-CV<br>Farjat, Alfredo; Bayer plc<br>Kolkhof, Peter; Cardiovascular Precision Medicines Bayer AG<br>Lage, Andrea; Bayer SA<br>Brinker, Meike; Cardiology and Nephrology Clinical Development<br>Pitt, B; University of Michigan |
| <b>Primary Subject Heading</b>: | Diabetes and endocrinology                                                                                                                                                                                                                                                                                                                                                                                                                                                                                                                                                                                                                                                                                                                                                                                                                                                                                                                                                                                                                                                                 |
| Secondary Subject Heading:      | Cardiovascular medicine                                                                                                                                                                                                                                                                                                                                                                                                                                                                                                                                                                                                                                                                                                                                                                                                                                                                                                                                                                                                                                                                    |
| Keywords:                       | Risk Factors, Diabetic nephropathy & vascular disease < DIABETES & ENDOCRINOLOGY, DIABETES & ENDOCRINOLOGY, Cardiovascular Disease                                                                                                                                                                                                                                                                                                                                                                                                                                                                                                                                                                                                                                                                                                                                                                                                                                                                                                                                                         |
|                                 |                                                                                                                                                                                                                                                                                                                                                                                                                                                                                                                                                                                                                                                                                                                                                                                                                                                                                                                                                                                                                                                                                            |

SCHOLARONE™  
Manuscripts



I, the Submitting Author has the right to grant and does grant on behalf of all authors of the Work (as defined in the below author licence), an exclusive licence and/or a non-exclusive licence for contributions from authors who are: i) UK Crown employees; ii) where BMJ has agreed a CC-BY licence shall apply, and/or iii) in accordance with the terms applicable for US Federal Government officers or employees acting as part of their official duties; on a worldwide, perpetual, irrevocable, royalty-free basis to BMJ Publishing Group Ltd ("BMJ") its licensees and where the relevant Journal is co-owned by BMJ to the co-owners of the Journal, to publish the Work in this journal and any other BMJ products and to exploit all rights, as set out in our [licence](#).

The Submitting Author accepts and understands that any supply made under these terms is made by BMJ to the Submitting Author unless you are acting as an employee on behalf of your employer or a postgraduate student of an affiliated institution which is paying any applicable article publishing charge ("APC") for Open Access articles. Where the Submitting Author wishes to make the Work available on an Open Access basis (and intends to pay the relevant APC), the terms of reuse of such Open Access shall be governed by a Creative Commons licence – details of these licences and which [Creative Commons](#) licence will apply to this Work are set out in our licence referred to above.

Other than as permitted in any relevant BMJ Author's Self Archiving Policies, I confirm this Work has not been accepted for publication elsewhere, is not being considered for publication elsewhere and does not duplicate material already published. I confirm all authors consent to publication of this Work and authorise the granting of this licence.

1  
2  
3  
4 1 **Finerenone Cardiovascular and Kidney Outcomes by Age**  
5  
6  
7 2 **and Sex: FIDELITY Post Hoc Analysis of Two Phase 3,**  
8  
9  
10 3 **Multicenter, Double-Blind Trials**

13 4 **Author(s)**

15 5 Shweta Bansal, MD,<sup>1</sup> Maria E.F. Canziani, MD,<sup>2</sup> Rita Birne, MD,<sup>3,4</sup> Stefan D. Anker, MD,  
16 6 PhD,<sup>5</sup> George L. Bakris, MD,<sup>6</sup> Gerasimos Filippatos, MD,<sup>7</sup> Peter Rossing, MD, DMSc,<sup>8,9</sup> Luis  
17 7 M. Ruilope, MD,<sup>10-12</sup> Alfredo E. Farjat, PhD,<sup>13</sup> Peter Kolkhof, PhD,<sup>14</sup> Andrea Lage, MD,<sup>15</sup>  
18 8 Meike Brinker, MD,<sup>16</sup> Bertram Pitt, MD<sup>17</sup>

23 9  
24  
25  
26 10 **Institution(s)**

27 11 <sup>1</sup>Division of Nephrology, Department of Medicine, University of Texas Health San Antonio,  
28 12 San Antonio, Texas, USA

29 13 <sup>2</sup>Nephrology Division, Federal University of São Paulo, São Paulo, Brazil

30 14 <sup>3</sup>Department of Nephrology, Centro Hospitalar Lisboa Ocidental, Lisbon, Portugal

31 15 <sup>4</sup>Nova Medical School, University of Lisbon, Lisbon, Portugal

32 16 <sup>5</sup>Department of Cardiology (CVK) of German Heart Center Charité; Institute of Health Center  
33 17 for Regenerative Therapies (BCRT), German Centre for Cardiovascular Research (DZHK)  
34 18 partner Site Berlin, Charité Universitätsmedizin, Berlin, Germany

35 19 <sup>6</sup>Department of Medicine, University of Chicago Medicine, Chicago, Illinois, USA

36 20 <sup>7</sup>National and Kapodistrian University of Athens, School of Medicine, Department of  
37 21 Cardiology, Attikon University Hospital, Athens, Greece

38 22 <sup>8</sup>Steno Diabetes Center Copenhagen, Gentofte, Denmark

39 23 <sup>9</sup>Department of Clinical Medicine, University of Copenhagen, Copenhagen, Denmark

40 24 <sup>10</sup>Cardiorenal Translational Laboratory and Hypertension Unit, Institute of Research imas12,  
41 25 Madrid, Spain

42 26 <sup>11</sup>CIBER-CV, Hospital Universitario 12 de Octubre, Madrid, Spain

43 1



1  
2  
3 27 <sup>12</sup>Faculty of Sport Sciences, European University of Madrid, Madrid, Spain  
4  
5 28 <sup>13</sup>Research and Development, Clinical Data Sciences and Analytics, Bayer PLC, Reading,  
6  
7 29 UK  
8  
9 30 <sup>14</sup>Research and Early Development, Cardiovascular Precision Medicines, Bayer AG,  
10  
11 31 Wuppertal, Germany  
12  
13 32 <sup>15</sup>Cardiology and Nephrology Clinical Development, Bayer SA, São Paulo, Brazil  
14  
15 33 <sup>16</sup>Cardiology and Nephrology Clinical Development, Bayer AG, Wuppertal, Germany  
16  
17 34 <sup>17</sup>Department of Medicine, University of Michigan School of Medicine, Ann Arbor, Michigan,  
18  
19 35 USA  
20  
21  
22  
23

24 37 **Contact information for corresponding author:**

25  
26 38 Name: Shweta Bansal, MD, FASN  
27  
28 39 Address: Department of Medicine, Division of Nephrology, Joe R. & Teresa Lozano Long  
29  
30 40 School of Medicine, UT Health, San Antonio, TX, USA  
31  
32 41 7703 Floyd Curl Drive, MSC 7882  
33  
34 42 San Antonio, TX-78229, USA  
35  
36 43 Phone no: 210-422-0438  
37  
38 44 Fax no: 210-567-4712  
39  
40 45 Email: bansals3@uthscsa.edu  
41  
42  
43  
44

45 47 **Journal:** *BMJ Open*

46  
47 48 **Running head:** Finerenone: Cardiovascular and Kidney Outcomes by Age and Sex

48  
49 49 **Key words:** chronic kidney disease, type 2 diabetes, cardiovascular, finerenone, risk factors

50  
51 50 **Word count:** 3050 of 4000

52  
53 51 **No. of figures and tables:** 4 of 5 tables/figures

54  
55 52 **No. of references:** 45  
56  
57  
58  
59  
60

## 53 ABSTRACT

54 **Objectives:** To evaluate the efficacy and safety of finerenone, a selective, nonsteroidal  
55 mineralocorticoid receptor antagonist, on cardiovascular and kidney outcomes by age and/or  
56 sex.

57 **Design:** FIDELITY post-hoc analysis; 3-year median follow-up.

58 **Setting:** FIDELITY: a prespecified analysis of FIDELIO-DKD and FIGARO-DKD.

59 **Participants:** Adults with type 2 diabetes and chronic kidney disease receiving optimized  
60 renin–angiotensin system inhibitors (N=13 026).

61 **Interventions:** Randomized 1:1; finerenone or placebo.

62 **Primary and secondary outcome measures:** Cardiovascular (cardiovascular death,  
63 nonfatal myocardial infarction, nonfatal stroke, or hospitalization for heart failure [HHF]) and  
64 kidney (kidney failure, sustained  $\geq 57\%$  estimated glomerular filtration rate [eGFR] decline, or  
65 renal death) composite outcomes.

66 **Results:** Mean age was 64.8 years; 45.2%, 40.1%, and 14.7% were aged  $<65$ , 65–74, and  
67  $\geq 75$  years, respectively; 69.8% were male. Cardiovascular benefits of finerenone versus  
68 placebo were consistent across age (hazard ratio [95% confidence interval]: 0.94 [0.81–1.10]  
69 [ $<65$  years], 0.84 [0.73–0.98] [65–74 years], 0.80 [0.65–0.99] [ $\geq 75$  years];  $P_{\text{interaction}}=.42$ ) and  
70 sex (hazard ratio [95% confidence interval]: 0.86 [0.77–0.96] [male], 0.89 [0.35–2.27]  
71 [premenopausal female], 0.87 [0.73–1.05] [postmenopausal female];  $P_{\text{interaction}}=.99$ ). HHF  
72 risk reduction was not modified by age ( $P_{\text{interaction}}=.70$ ) but appeared more pronounced in  
73 males ( $P_{\text{interaction}}=.02$ ). Kidney events were reduced with finerenone versus placebo in ages  
74  $<65$  and 65–74 but not  $\geq 75$ ; no heterogeneity in treatment effect was observed  
75 ( $P_{\text{interaction}}=.51$ ). In sex subgroups, finerenone consistently reduced kidney events  
76 ( $P_{\text{interaction}}=.85$ ). Finerenone reduced albuminuria and eGFR decline regardless of age and  
77 sex. Hyperkalemia increased with finerenone, but discontinuation rates were  $<3\%$  across  
78 subgroups. Gynecomastia in males was uncommon across age subgroups and identical  
79 between treatment groups.

1  
2  
3 80 **Conclusions:** Finerenone improved cardiovascular and kidney outcomes with no significant  
4  
5 81 heterogeneity between age and sex subgroups; HHF risk reduction appeared more  
6  
7 82 pronounced in males. Finerenone demonstrated a similar safety profile across age and sex.

8  
9 83 **Registration:** FIDELIO-DKD (NCT02540993); FIGARO-DKD (NCT02545049)  
10  
11 84

12  
13 85 **Abstract word count:** 300 of 300  
14  
15

## 16 86 **STRENGTHS AND LIMITATIONS OF THIS STUDY**

- 17 87 • An advantage of this study was the use of combined individual-level data from the  
18  
19 88 FIDELIO-DKD and FIGARO-DKD phase 3 clinical trials, resulting in a large number of  
20  
21 89 patients included in the full analysis set  
22  
23 90 • This study did not use predefined age categories, as it was a post hoc analysis, which  
24  
25 91 may have resulted in some of the tests performed being underpowered  
26  
27 92 • Limitations present in FIDELITY are present in this analysis, such as the small proportion  
28  
29 93 of Black patients and exclusion of patients with nonalbuminuric CKD  
30  
31 94

## 95 INTRODUCTION

96 In patients with diabetes, the risk of cardiovascular (CV) disease and chronic kidney disease  
97 (CKD) increases with age.[1] Likewise, vascular complications are affected by sex and are  
98 increased in females more than males in patients with diabetes.[2]

99  
100 Among individuals aged 50–75 years without baseline diabetes, CKD, or CV disease, males  
101 have a steeper decline in glomerular filtration rate (GFR) than females.[3] However, reported  
102 effects of sex on risk of incidental and progressive CKD in patients with type 2 diabetes  
103 (T2D) have been inconsistent.[4-6] In trials including patients with CKD, female  
104 representation varies (25–40%),[7-11] whereas in real-world studies, females make up over  
105 half of patients.[12,13]

106  
107 Overactivation of the mineralocorticoid receptor (MR) is associated with CV and kidney  
108 diseases.[14,15] In epithelial cells, the 11  $\beta$ -hydroxysteroid dehydrogenase type 2 (11 $\beta$ -  
109 HSD2) enzyme prevents inappropriate MR activation by cortisol.[16-18] The activity of 11 $\beta$ -  
110 HSD2 decreases with age, resulting in MR overactivation in the elderly despite low  
111 circulating aldosterone levels.[16-18] Sex also influences 11 $\beta$ -HSD2 activity, particularly in  
112 patients with hypertension, where 11 $\beta$ -HSD2 activity is reduced in males versus females.[16]  
113 The MR is also expressed in nonepithelial cells, including endothelial cells, vascular smooth  
114 muscle cells, adipocytes, and immune cells.[17] In many of these, the MR may be activated  
115 by cortisol because of a lack of protection by 11 $\beta$ -HSD2.[19,20]

116  
117 Despite management with recommended treatments for CKD in T2D, 10–13% of patients  
118 experience CKD progression or kidney failure and are at high risk of CV events, including CV  
119 death within 2–3 years following treatment initiation.[10,21,22] Finerenone, a selective,  
120 nonsteroidal MR antagonist (MRA), reduced the risk of CKD progression and CV outcomes  
121 compared with placebo in patients with CKD and T2D in FIDELITY (The Finerenone in

1  
2  
3 122 chronic kidney disease and type 2 diabetes: Combined FIDELIO-DKD and FIGARO-DKD  
4  
5 123 Trial programme analysis), a prespecified pooled analysis of the FIDELIO-DKD (Finerenone  
6  
7 124 in reducing kidney failure and disease progression in Diabetic Kidney Disease;  
8  
9 125 NCT02540993) and FIGARO-DKD (Finerenone in reducing cardiovascular mortality and  
10  
11 126 morbidity in Diabetic Kidney Disease; NCT02545049) phase 3 trials.[21] However, the  
12  
13 127 influence of age and sex on outcomes with finerenone is unknown. This post hoc analysis  
14  
15 128 evaluated whether the cardiovascular and kidney benefits and safety profile of finerenone  
16  
17 129 observed in FIDELITY are consistent in patients with CKD and T2D across ages and in both  
18  
19 130 sexes.  
20  
21  
22

## 23 131 **METHODS**

### 24 25 26 132 **Study design and patients**

27  
28  
29 133 FIDELITY combined individual patient-level data from the FIDELIO-DKD and FIGARO-DKD  
30  
31 134 phase 3 clinical trials. The study design, procedures, and outcomes for the trials have been  
32  
33 135 previously published.[23-25] The FIDELIO-DKD and FIGARO-DKD trials were conducted in  
34  
35 136 accordance with the principles of the Declaration of Helsinki. Protocol approvals were  
36  
37 137 obtained from local regulatory authorities and ethics committees. Written informed consent  
38  
39 138 was provided by all participants. These studies were reported following the Consolidated  
40  
41 139 Standards of Reporting Trials (CONSORT) reporting guideline.  
42  
43  
44  
45

46 141 Eligible patients were aged  $\geq 18$  years with CKD and T2D, receiving maximum tolerated  
47  
48 142 renin-angiotensin system inhibitor, and with serum potassium levels  $\leq 4.8$  mmol/L at  
49  
50 143 screening. Patients had either a urine albumin-to-creatinine ratio (UACR)  $\geq 30$ – $< 300$  mg/g  
51  
52 144 and an estimated GFR (eGFR)  $\geq 25$ – $\leq 90$  mL/min/1.73 m<sup>2</sup>, or UACR  $\geq 300$ – $\leq 5000$  mg/g and  
53  
54 145 eGFR  $\geq 25$  mL/min/1.73 m<sup>2</sup>. Patients with symptomatic heart failure (HF) with reduced  
55  
56 146 ejection fraction were excluded because this implies an indication for a steroidal MRA.  
57  
58  
59  
60

1  
2  
3 148 Standard-of-care therapy with a renin–angiotensin system inhibitor was optimized during the  
4  
5 149 run-in period. Patients were randomly assigned (1:1) to receive finerenone at titrated doses  
6  
7 150 (10 or 20 mg) once-daily oral treatment or matching placebo.  
8  
9

### 10 151 **Key outcomes**

11  
12  
13 152 Efficacy outcomes included a CV composite outcome of CV death, nonfatal myocardial  
14  
15 153 infarction, nonfatal stroke, or hospitalization for HF (HHF), and a kidney composite outcome  
16  
17 154 of kidney failure, sustained  $\geq 57\%$  eGFR decline, or renal death. Additional outcomes  
18  
19 155 included HHF and change in UACR and eGFR over time.  
20

21 156  
22  
23 157 Safety outcomes included incidence of investigator-reported adverse events (AEs), including  
24  
25 158 those leading to treatment discontinuation, central laboratory assessment of serum  
26  
27 159 potassium levels  $>5.5$  and  $>6.0$  mmol/L, and other safety events of interest, such as  
28  
29 160 hypotension, hyperkalemia, and gynecomastia in males.  
30

31 161  
32  
33 162 Outcomes were analyzed according to patient age at baseline ( $<65$ ,  $65$ – $75$ ,  $\geq 75$  years) and  
34  
35 163 sex. Females were categorized as either pre- or postmenopausal if they were aged  $<51.4$  or  
36  
37 164  $\geq 51.4$  years at baseline, respectively (based on the median age of menopause onset from  
38  
39 165 the Massachusetts Women's Health Study).[26]  
40  
41

### 42 166 **Statistical analysis**

43  
44  
45 167 Statistical analyses were performed as described in FIDELITY.[23] The full analysis set  
46  
47 168 comprised all randomized patients (except those with critical Good Clinical Practice  
48  
49 169 violations, who were prospectively excluded). Safety analyses were performed in the safety  
50  
51 170 analysis set (randomized patients without critical Good Clinical Practice violations who took  
52  
53 171  $>1$  dose of study drug). The analyses were prespecified exploratory evaluations of outcomes  
54  
55 172 according to age and sex, with events reported from randomization up to the end-of-study  
56  
57 173 visit. Stratified Cox proportional hazards models,[27,28] including stratification factors:  
58  
59  
60

1  
2  
3 174 geographic region, eGFR and albuminuria category at screening, history of CV disease, and  
4  
5 175 study, were used for the analysis of time-to-event clinical outcomes. The *P*-values for  
6  
7 176 interaction between the treatment group (finerenone or placebo) and each baseline subgroup  
8  
9 177 (age or sex) were based on stratified Cox proportional hazards models, accounting for the  
10  
11 178 treatment effect, the subgroup effect, and their interaction.

13  
14 179

15  
16 180 Changes in UACR and eGFR over time were assessed using a linear mixed-model analysis  
17  
18 181 accounting for repeated measurements over time. The least-squares mean ratio and  
19  
20 182 absolute change from baseline were estimated from the models for changes in UACR and  
21  
22 183 eGFR, respectively. The 2-slope, linear spline, mixed-model, repeated measure method[29]  
23  
24 184 was used to estimate the rate of change in eGFR across time, specifically total (annualized  
25  
26 185 rate of change in eGFR from baseline to permanent discontinuation or end of study) and  
27  
28 186 chronic (from month 4 to permanent discontinuation or end of study) eGFR slopes. To  
29  
30 187 account for possible nonlinear effects of age on clinical outcomes, age was modeled with  
31  
32 188 cubic splines with 3 knots in Cox proportional hazards models, to produce plots of the hazard  
33  
34 189 ratios (HRs) and 95% confidence interval as functions of age and sex.

## 37 38 190 **Patients and public involvement**

39  
40 191 No patient or public involvement in the current study.

## 42 43 192 **RESULTS**

### 46 47 193 **Patients**

48  
49 194 FIDELITY included 13 026 patients.[23] Median follow-up was 3 years (interquartile range  
50  
51 195 2.3–3.8).[23] Mean age at baseline was 64.8 years (standard deviation 9.5), with 45.2%,  
52  
53 196 40.1%, and 14.7% of patients aged <65, 65–74, and ≥75 years at baseline, respectively.  
54  
55 197 Most patients (69.8%) were male; 2.5% were premenopausal females, and 27.8% were  
56  
57 198 postmenopausal females. Patients were distributed evenly between treatment arms within  
58  
59 199 age and sex subgroups (**eTable 1**).

60  
8

1  
2  
3 200 **Baseline characteristics**  
4

5 201 Baseline characteristics were similar across age subgroups except for some key differences  
6  
7 202 (**Table 1**). The overall FIDELITY population was predominantly White (68.1%), the proportion  
8  
9 203 of which increased with age. Mean eGFR was 64, 54, and 48 mL/min/1.73 m<sup>2</sup> in patients  
10  
11 204 aged <65, 65–75, and ≥75 years, respectively. Median UACR was 650, 439, and 332 mg/g in  
12  
13 205 patients aged <65, 65–75, and ≥75 years, respectively. History of CV disease was more  
14  
15 206 common in the ≥75 years group; this trend was also observed for atrial fibrillation/atrial flutter.  
16  
17 207 Baseline characteristics in sex subgroups are shown in **Table 1**.  
18  
19  
20  
21  
22  
23  
24  
25  
26  
27  
28  
29  
30  
31  
32  
33  
34  
35  
36  
37  
38  
39  
40  
41  
42  
43  
44  
45  
46  
47  
48  
49  
50  
51  
52  
53  
54  
55  
56  
57  
58  
59  
60



208 Table 1. Patient Baseline Characteristics According to Age and Sex

| Characteristic                               | All<br>(N=13 026) | Age                   |                         |                       | Sex              |                                    |                                      |
|----------------------------------------------|-------------------|-----------------------|-------------------------|-----------------------|------------------|------------------------------------|--------------------------------------|
|                                              |                   | <65 Years<br>(n=5889) | 65–74 Years<br>(n=5221) | ≥75 Years<br>(n=1916) | Male<br>(n=9088) | Premenopausal<br>Female<br>(n=323) | Postmenopausal<br>Female<br>(n=3615) |
| Age, y, mean ± SD                            | 64.8 ± 9.5        | 56.4 ± 6.6            | 69.2 ± 2.8              | 78.4 ± 3.1            | 64.8 ± 9.5       | 45.1 ± 4.9                         | 66.3 ± 8.0                           |
| Sex, n (%)                                   |                   |                       |                         |                       |                  |                                    |                                      |
| Female                                       | 3938 (30.2)       | 1839 (31.2)           | 1501 (28.7)             | 598 (31.2)            | 9088 (100)       | 0 (0.0)                            | 0 (0.0)                              |
| Male                                         | 9088 (69.8)       | 4050 (68.8)           | 3720 (71.3)             | 1318 (68.8)           | 0 (0.0)          | 323 (100)                          | 3615 (100)                           |
| Race, n (%)                                  |                   |                       |                         |                       |                  |                                    |                                      |
| Asian                                        | 2894 (22.2)       | 1591 (27.0)           | 997 (19.1)              | 306 (16.0)            | 2136 (23.5)      | 87 (26.9)                          | 671 (18.6)                           |
| Black/African American                       | 522 (4.0)         | 309 (5.2)             | 160 (3.1)               | 53 (2.8)              | 284 (3.1)        | 37 (11.5)                          | 201 (5.6)                            |
| White                                        | 8869 (68.1)       | 3592 (61.0)           | 3817 (73.1)             | 1460 (76.2)           | 6231 (68.6)      | 167 (51.7)                         | 2471 (68.4)                          |
| Other <sup>a</sup>                           | 741 (5.7)         | 397 (6.7)             | 247 (4.7)               | 97 (5.1)              | 437 (4.8)        | 32 (9.9)                           | 272 (7.5)                            |
| Systolic blood pressure, mm Hg, mean (SD)    | 136.7 ± 14.2      | 135.6 ± 14.0          | 137.4 ± 14.2            | 138.4 ± 14.6          | 136.8 ± 14.2     | 133.0 ± 14.0                       | 136.9 ± 14.3                         |
| Diastolic blood pressure, mm Hg, mean (SD)   | 76.4 ± 9.6        | 78.8 ± 9.1            | 74.9 ± 9.4              | 72.8 ± 9.8            | 76.5 ± 9.7       | 80.1 ± 8.4                         | 75.6 ± 9.5                           |
| Duration of diabetes, years, mean (SD)       | 15.4 ± 8.7        | 13.5 ± 7.6            | 16.4 ± 8.6              | 18.6 ± 10.4           | 15.3 ± 8.5       | 10.6 ± 7.0                         | 16.0 ± 9.1                           |
| HbA1c, %, mean (SD)                          | 7.7 ± 1.4         | 7.9 ± 1.5             | 7.6 ± 1.3               | 7.4 ± 1.2             | 7.6 ± 1.3        | 8.2 ± 1.7                          | 7.9 ± 1.4                            |
| Serum potassium, mmol/L, mean (SD)           | 4.4 ± 0.4         | 4.4 ± 0.5             | 4.4 ± 0.4               | 4.4 ± 0.4             | 4.3 ± 0.4        | 4.3 ± 0.4                          | 4.4 ± 0.4                            |
| eGFR, mL/min/1.73 m <sup>2</sup> , mean (SD) | 57.6 ± 21.7       | 64.3 ± 24.0           | 53.5 ± 18.5             | 48.1 ± 15.1           | 57.7 ± 21.2      | 77.0 ± 28.9                        | 55.6 ± 21.3                          |

|                                                 |                          |                          |                          |                         |                          |                          |                          |
|-------------------------------------------------|--------------------------|--------------------------|--------------------------|-------------------------|--------------------------|--------------------------|--------------------------|
| UACR, mg/g, median (Q1–Q3)                      | 514.68<br>(197.8–1147.1) | 650.48<br>(315.2–1363.5) | 438.63<br>(154.1–1030.7) | 332.29<br>(107.8–830.5) | 511.53<br>(200.9–1130.1) | 793.52<br>(376.6–1547.3) | 501.47<br>(173.6–1149.1) |
| BMI, kg/m <sup>2</sup> , mean (SD)              | 31.3 ± 6.0               | 32.0 ± 6.4               | 31.1 ± 5.7               | 29.6 ± 5.0              | 31.0 ± 5.6               | 34.1 ± 7.9               | 32.0 ± 6.6               |
| Current smoker, <i>n</i> (%)                    | 2093 (16.1)              | 1283 (21.8)              | 686 (13.1)               | 124 (6.5)               | 1730 (19.0)              | 35 (10.8)                | 328 (9.1)                |
| History of CV disease, present, <i>n</i> (%)    | 5935 (45.6)              | 2188 (37.2)              | 2667 (51.1)              | 1080 (56.4)             | 4374 (48.1)              | 56 (17.3)                | 1505 (41.6)              |
| History of heart failure                        | 1007 (7.7)               | 413 (7.0)                | 432 (8.3)                | 162 (8.5)               | 630 (6.9)                | 22 (6.8)                 | 355 (9.8)                |
| History of atrial fibrillation/atrial flutter   | 1106 (8.5)               | 266 (4.5)                | 547 (10.5)               | 293 (15.3)              | 867 (9.5)                | 0                        | 239 (6.6)                |
| Baseline medications, <i>n</i> (%) <sup>b</sup> |                          |                          |                          |                         |                          |                          |                          |
| RAS inhibitors (ACEis/ARBs)                     | 13003 (99.8)             | 5876 (99.8)              | 5213 (99.8)              | 1914 (99.9)             | 9069 (99.8)              | 323 (100.0)              | 3611 (99.9)              |
| Beta-blockers                                   | 6504 (49.9)              | 2619 (44.5)              | 2849 (54.6)              | 1036 (54.1)             | 4545 (50.0)              | 111 (34.4)               | 1848 (51.1)              |
| Diuretics                                       | 6710 (51.5)              | 2790 (47.4)              | 2813 (53.9)              | 1107 (57.8)             | 4706 (51.8)              | 137 (42.4)               | 1867 (51.6)              |
| Statins                                         | 9399 (72.2)              | 4033 (68.5)              | 3920 (75.1)              | 1446 (75.5)             | 6696 (73.7)              | 203 (62.8)               | 2500 (69.2)              |
| Calcium channel blockers                        | 7358 (56.5)              | 3127 (53.1)              | 3052 (58.5)              | 1179 (61.5)             | 5208 (57.3)              | 149 (46.1)               | 2001 (55.4)              |
| Insulin                                         | 7630 (58.6)              | 3637 (61.8)              | 3020 (57.8)              | 973 (50.8)              | 5203 (57.3)              | 193 (59.8)               | 2234 (61.8)              |
| GLP-1RA                                         | 944 (7.2)                | 492 (8.4)                | 378 (7.2)                | 74 (3.9)                | 676 (7.4)                | 30 (9.3)                 | 238 (6.6)                |
| SGLT-2i                                         | 877 (6.7)                | 517 (8.8)                | 289 (5.5)                | 71 (3.7)                | 671 (7.4)                | 36 (11.1)                | 170 (4.7)                |

ACEi = angiotensin-converting enzyme inhibitor; ARB = angiotensin receptor blocker; BMI = body mass index; CV = cardiovascular; eGFR = estimated

glomerular filtration rate; GLP-1RA = glucagon-like peptide-1 receptor agonist; HbA1c = glycated hemoglobin; Q = quartile; RAS = renin–angiotensin system;

SD = standard deviation; SGLT-2i = sodium-glucose co-transporter-2 inhibitor; UACR = urine albumin-to-creatinine ratio.

<sup>a</sup> Other: included American Indian/Alaska Native, Native Hawaiian/other Pacific Islander, not reported, multiple.

<sup>b</sup> Analysis allowed multiple drug groups for the same drug.

## 214 Efficacy

### 215 CV composite outcome by age

216 CV composite event rates, including the components of the composite outcome, increased  
217 with patient age in both treatment arms (**Figure 1A** and **eFigure 1A**). Treatment with  
218 finerenone resulted in a numerical reduction in CV composite event rates versus placebo in  
219 all age groups (**Figure 1A**); however, no significant heterogeneity was observed for the effect  
220 of finerenone across categorical age subgroups ( $P_{\text{interaction}}=.42$ ). There was also no evidence  
221 of treatment effect modification when age was modeled as a continuous variable  
222 ( $P_{\text{interaction}}=.10$ ). The trend of HR as a function of age was modeled with cubic splines  
223 (**eFigure 2A**).

224  
225 HHF event rates were numerically lower with finerenone than placebo in all age subgroups  
226 (**Figure 1A**). The effect of finerenone on HHF risk reduction was consistent across age  
227 subgroups, with no significant heterogeneity observed ( $P_{\text{interaction}}=.70$ ).

### 228 CV composite outcome by sex

229 CV composite event rates were numerically lower with finerenone than placebo for males,  
230 premenopausal females, and postmenopausal females (**Figure 1B** and **eFigure 1B**). There  
231 was no significant heterogeneity in the effect of finerenone on reducing the risk of the CV  
232 composite outcome across sex subgroups ( $P_{\text{interaction}}=.99$ ). When age was modeled with cubic  
233 splines by sex, the effect of finerenone was consistent with advancing age in males;  
234 however, a trend toward a stronger effect in older versus younger females was noted  
235 (**eFigure 2B**, **eFigure 2C**). Age distribution by sex is demonstrated in **eFigure 2D**.

236

237 No heterogeneity was observed in the effect of finerenone on reducing the risk of the CV  
238 death, nonfatal myocardial infarction, and nonfatal stroke components of the CV composite  
239 outcome (**eFigure 1B**). However, statistical heterogeneity was observed in the reduction of

12

1  
2  
3 240 HHF with finerenone versus placebo ( $P_{\text{interaction}}=.02$ ), and the effect appeared to be more  
4  
5 241 pronounced in males than premenopausal/postmenopausal females (**Figure 1B**). These  
6  
7 242 results persisted after adjustment for differences in baseline age, body mass index, systolic  
8  
9 243 blood pressure, hemoglobin, eGFR, UACR, smoking history, and history of atrial fibrillation  
10  
11 244 between sex subgroups ( $P_{\text{interaction}}=.02$ ).

#### 14 245 Kidney composite outcome by age

16  
17 246 Kidney composite event rates were lower with finerenone than placebo in the <65 years and  
18  
19 247 the 65–74 years groups but were similar in the  $\geq 75$  years group (**Figure 2A**). The effect of  
20  
21 248 finerenone on reducing the risk of the kidney composite outcome was consistent across age  
22  
23 249 subgroups, with no significant heterogeneity detected ( $P_{\text{interaction}}=.51$ ) and no evidence of  
24  
25 250 treatment effect modification when age was modeled as a continuous variable ( $P_{\text{interaction}}=.77$ ).  
26  
27 251 The trend of HR as function of age was modeled with cubic splines (**eFigure 3A**).

#### 30 252 Kidney composite outcome by sex

31  
32  
33 253 Kidney composite event rates were lower with finerenone than placebo in males but were  
34  
35 254 similar in premenopausal and postmenopausal females (**Figure 2B**). There was no  
36  
37 255 significant heterogeneity in the effect of finerenone on reducing the risk of the kidney  
38  
39 256 composite outcome across sex subgroups ( $P_{\text{interaction}}=.85$ ). When age was modeled with cubic  
40  
41 257 splines by sex subgroups, the effect of finerenone suggests trends similar to overall results in  
42  
43 258 males and females across all age groups (**eFigure 3B**, **eFigure 3C**). Age distribution by sex  
44  
45 259 is demonstrated in **eFigure 3D**.

#### 48 260 Effect of finerenone on markers of kidney function and damage by age and sex

49  
50  
51 261 Finerenone significantly attenuated the least-squares mean change in eGFR from month 4 to  
52  
53 262 end of treatment (chronic eGFR slope) compared with placebo across all age ( $P<.0001$  for all  
54  
55 263 3 subgroups) (**Figure 3**) and sex subgroups (**eFigure 4**). Finerenone reduced UACR over  
56  
57 264 time compared with placebo regardless of age and sex (**eFigure 5**).

## 265 **Safety**

266 The incidence of any AE was similar between treatment groups irrespective of age or sex  
267 (**eTable 2**). There were more drug-related AEs with finerenone than placebo in age and sex  
268 subgroups except premenopausal females, where the incidence was similar. AEs leading to  
269 drug discontinuation were more frequent in patients given finerenone than placebo (6.4%  
270 and 5.4%, respectively), with higher incidences in the 65–74 and ≥75 years groups than the  
271 <65 years group; there were more AEs leading to drug discontinuation with finerenone than  
272 placebo in males and premenopausal females but not in postmenopausal females.

273  
274 Although the incidences of any serious AEs (SAEs), study drug-related SAEs, or SAEs  
275 leading to drug discontinuation were similar between treatment arms across all age and sex  
276 subgroups, the overall incidences of SAEs increased with age and was highest in males,  
277 followed by postmenopausal females, then premenopausal females.

278  
279 In all age and sex subgroups, the incidences of treatment-emergent hypotension AEs were  
280 higher with finerenone than placebo but did not have a substantial impact on related clinical  
281 outcomes, including falls, dizziness, and fatigue. A trend of increased incidence of  
282 hypotension with increasing age was observed in patients treated with finerenone; however,  
283 the incidence of hypotension was generally low across all age subgroups (<6%; **eTable 2**).

284  
285 In FIDELITY, finerenone increased the risk of any hyperkalemia event versus placebo;  
286 similar findings were observed in all age and sex subgroups, except premenopausal females  
287 (**eTable 2**). The incidences of any hyperkalemia AEs leading to discontinuation of study drug  
288 and any serious hyperkalemia AEs leading to hospitalization were low across all age and sex  
289 subgroups (<3% and <2%, respectively). However, the relative risk of treatment  
290 discontinuation because of hyperkalemia with finerenone versus placebo increased with  
291 advancing age (relative risk [95% confidence interval] for ages 45–64, 65–74, and ≥75 years:

1  
2  
3 292 2.2 [1.2–4.3], 2.8 [1.7–4.7], and 4.4 [1.8–10.8], respectively; **eFigure 6**). Treatment-emergent  
4  
5 293 serum potassium levels >5.5 mmol/L and >6.0 mmol/L were more frequent with finerenone  
6  
7 294 than placebo, being consistent across all age and sex subgroups. The incidence of  
8  
9 295 gynecomastia in males was the same with finerenone (0.2%) and placebo (0.2%) across all  
10  
11 296 ages.

## 15 297 **DISCUSSION**

17 298 The findings of this post hoc analysis suggest that finerenone reduced the risk of CV and  
18  
19 299 kidney composite outcomes versus placebo across all age and sex subcategories. In  
20  
21 300 FIDELITY, HHF was the main driver of CV benefit with finerenone[23]; lower incidences of  
22  
23 301 HHF with finerenone versus placebo were observed in this analysis across all age  
24  
25 302 subgroups, with some differences noted between sex subgroups. Moreover, the incidences  
26  
27 303 of any AEs or SAEs were similar between the treatment groups regardless of age and sex.  
28  
29

30 304  
31  
32 305 The current results are supported by findings from a pharmacokinetics (PK) analysis based  
33  
34 306 on FIDELIO-DKD and FIGARO-DKD data, in which both age and sex were tested as  
35  
36 307 covariates for a population PK model, and their effect on finerenone exposure was not  
37  
38 308 significant, suggesting a lack of influence of these factors on the PK of the drug.[30]  
39  
40 309 Additionally, the results for the CV outcome in this analysis are similar to findings from other  
41  
42 310 studies of MRAs in HF. In TOPCAT (Treatment of Preserved Cardiac Function Heart Failure  
43  
44 311 with an Aldosterone Antagonist), age did not affect the efficacy of spironolactone in patients  
45  
46 312 with HF with reduced ejection fraction (primary composite outcome: CV death, aborted  
47  
48 313 cardiac arrest and HHF; secondary outcomes included CV death, all-cause death and  
49  
50 314 HHF).[31] Moreover, in analyses of HF studies (RALES [Effect of Spironolactone on  
51  
52 315 Morbidity and Mortality in Patients with Severe Heart Failure], EMPHASIS-HF [Eplerenone in  
53  
54 316 Patients with Systolic Heart Failure and Mild Symptoms], and TOPCAT), MRAs reduced  
55  
56 317 morbidity and mortality in elderly patients,[32] demonstrating a consistent benefit regardless  
57  
58 318 of sex.[33] In contrast to our results, female sex was associated with poorer kidney outcomes  
59  
60

1  
2  
3 319 versus male sex in patients receiving a steroidal MRA for bilateral primary aldosteronism.[34]  
4  
5 320 The MR can be activated by different drivers in different diseases; MR activation in diabetes  
6  
7 321 is driven by additional factors other than high aldosterone in comparison with primary  
8  
9 322 aldosteronism, which may account for differences in outcomes observed across different  
10  
11 323 indications.[35]  
12  
13 324  
14  
15 325 In this study, the elderly population had higher risk of certain AEs including hypotension, AEs  
16  
17 326 leading to discontinuation, and death. Hypotension occurred more frequently in the  
18  
19 327 finerenone group but did not seem to substantially affect related clinical outcomes.  
20  
21 328 Hyperkalemia was more prevalent with finerenone but was generally similar across age and  
22  
23 329 sex. In a FIDELIO-DKD subanalysis, younger age and female sex were independent risk  
24  
25 330 factors for hyperkalemia (>6.0 mmol/L).[36] Similar findings for age were observed in  
26  
27 331 TOPCAT post hoc data for patients with HF.[31] Steroidal MRAs have been associated with  
28  
29 332 gynecomastia in males,[37,38] which was not observed in this study, most likely because  
30  
31 333 finerenone has no detectable affinity for androgen receptors.[38]  
32  
33 334  
34  
35 335 Preclinical data suggest that different molecular mechanisms drive endothelial dysfunction in  
36  
37 336 male and female mice[39,40] and that increased age and male sex are associated with MR  
38  
39 337 overactivation, which is linked to vascular stiffness and endothelial dysfunction.[41,42] In  
40  
41 338 human aortic smooth muscle cells, MR expression increased with age, leading to epigenetic  
42  
43 339 changes associated with increased vascular stiffness. These effects were reversed with MR  
44  
45 340 inhibition.[43] In vitro, MR expression in the whole aortae and early passage aortic vascular  
46  
47 341 smooth muscle cells was increased in aged (30 months) versus adult (8 months) rat  
48  
49 342 cells.[41] In a preclinical mouse model, aortic stiffness occurred earlier in male than female  
50  
51 343 mice and correlated with the timing of increased aortic MR expression; vascular stiffness was  
52  
53 344 prevented in smooth muscle cell MR-deficient mice.[42] These data suggest that elderly  
54  
55 345 males may derive the greatest benefit from finerenone; indeed, in this analysis, finerenone-  
56  
57 346 treated males had lower risk of the CV composite outcome and HHF versus placebo across  
58  
59  
60

1  
2  
3 347 age groups, including >75 years. Moreover, statistical heterogeneity was observed for HHF  
4  
5 348 by sex, persisting after adjustment for differences in baseline characteristics, which might  
6  
7 349 suggest a more pronounced effect of finerenone on HHF reduction in the male subgroup  
8  
9 350 compared with the 2 female subgroups. However, because of the small sample size of the  
10  
11 351 sex subgroups (especially that of the premenopausal female subgroup), definitive  
12  
13 352 conclusions cannot be reached based on this finding.  
14

15 353

16  
17  
18 354 In this study, markers of kidney damage (eGFR decline and UACR) were reduced with  
19  
20 355 finerenone in age subgroups; however, no benefit on kidney outcomes was observed in the  
21  
22 356 >75 years age group. The small sample size of this subgroup precluded definitive  
23  
24 357 conclusions, which may be accounted for by the slowing rate of CKD progression with  
25  
26 358 advancing age.[44,45]  
27

28 359

29  
30 360 Limitations include the study being a post hoc analysis and the chosen age categories not  
31  
32 361 being predefined. In addition, patients may have initiated other treatments during the study.  
33  
34 362 Sample size and number of events for females, particularly premenopausal females, were  
35  
36 363 small. Therefore, there is uncertainty around the estimates and the analysis was  
37  
38 364 underpowered to draw meaningful conclusions in this subgroup. Results for premenopausal  
39  
40 365 females versus postmenopausal females/males should be interpreted with caution because  
41  
42 366 age may partly account for differences observed; the average age of premenopausal females  
43  
44 367 was ~45 years old compared with postmenopausal females (~66 years old) and males  
45  
46 368 (~65 years old) (**Table 1**). As such, these groups had different baseline characteristics.  
47  
48 369 Higher baseline mean eGFR and median UACR, and lower history of CV comorbidities and  
49  
50 370 hypotension were observed in premenopausal females versus males and postmenopausal  
51  
52 371 females. Additionally, the study design and tests performed may have been underpowered to  
53  
54 372 address the research questions. Furthermore, FIDELITY limitations, mainly the small  
55  
56 373 proportion of Black patients and exclusion of patients with nonalbuminuric CKD, were  
57  
58 374 present in this analysis.  
59  
60

17



1  
2  
3 375

4  
5 376 In conclusion, this post hoc FIDELITY analysis suggests that finerenone effectively lowers  
6  
7 377 the risk of clinically important cardiovascular and kidney outcomes in patients with CKD and  
8  
9 378 T2D across ages and sexes, with a potentially more pronounced effect on HHF in males than  
10  
11 379 in females. No new safety concerns were identified in those aged >65 years or by sex.  
12

13  
14 380  
15  
16  
17  
18  
19  
20  
21  
22  
23  
24  
25  
26  
27  
28  
29  
30  
31  
32  
33  
34  
35  
36  
37  
38  
39  
40  
41  
42  
43  
44  
45  
46  
47  
48  
49  
50  
51  
52  
53  
54  
55  
56  
57  
58  
59  
60

For peer review only

## 381 **ACKNOWLEDGMENTS**

382 Medical writing assistance was provided by Fay Nikolopoulou, MSc and Ines Neves, MSc of  
383 Chameleon Communications International, and was funded by Bayer AG.

384

## 385 **FUNDING**

386 This work was supported by Bayer AG, who funded the FIDELIO-DKD and FIGARO-DKD  
387 studies and combined analysis. Grant/ award number: Not applicable

388

## 389 **CONTRIBUTORS**

390 SB prepared the initial analysis; SB, MEFC, RB, SDA, GLB, GF, PR, LMR, AEF, PK, AL, MB,  
391 and BP had access to and participated in the interpretation of the data. SB developed the  
392 initial manuscript draft, which was then reviewed and edited by MEFC, RB, SDA, GLB, GF,  
393 PR, LMR, AEF, PK, AL, MB, and BP. SB, MEFC, RB, SDA, GLB, GF, PR, LMR, AEF, PK,  
394 AL, MB, and BP vouch for the completeness and accuracy of the data and agreed to submit  
395 the manuscript for publication. The Executive Committee (including SDA, GLB, GF, PR, LMR  
396 and BP) in collaboration with the funder (including AEF, PK, AL, and MB) designed the trials  
397 and protocols and supervised trial conduct. The funder also had a role in the management,  
398 analysis, and interpretation of the data; preparation, review, or approval of the manuscript;  
399 and decision to submit the manuscript for publication.

## 400 **DISCLOSURES**

401 **SB** reports research support from 3ive, Bayer, Boehringer Ingelheim, Novartis, and Novo  
402 Nordisk; honorarium from UpToDate; consultancy fees from Baxter; and speaker bureau fees  
403 from Home Dialysis University and PD Excellence Academy.

404 **MEFC** reports consultancy fees from AstraZeneca, Bayer, Boehringer Ingelheim, and  
405 Fresenius Medical Care, and research support from Baxter and Fresenius.

19

1  
2  
3 406 **RB** reports consultancy fees from AstraZeneca, Bayer, Boehringer Ingelheim, Gilead, MSD,  
4  
5 407 Mundipharma, Sanofi, and Servier.

6  
7 408 **SDA** reports grants from Abbott Vascular and Vifor International; and personal fees  
8  
9 409 from Amgen, AstraZeneca, Bayer, Boehringer Ingelheim, BioVentrix, Brahms, Cardiac  
10  
11 410 Dimensions, Cardior, Cordio, CVRx, Edwards, Impulse Dynamics, Janssen, Novartis,  
12  
13 411 Occlutech, Respicardia, Servier, Vectorious, and V-Wave.

14  
15 412 **GLB** reports consultancy fees from Alnylam, Ionis, and Merck.

16  
17 413 **GF** is a trial committee member for Amgen, Bayer (no fees received), Boehringer Ingelheim,  
18  
19 414 Medtronic, Novartis, Servier, and Vifor.

20  
21 415 **PR** reports personal fees from Bayer during the conduct of the study; he has received  
22  
23 416 research support and personal fees from AstraZeneca and Novo Nordisk, and personal fees  
24  
25 417 from Astellas, Boehringer Ingelheim, Eli Lilly, Gilead, Mundipharma, Sanofi, and Vifor; all  
26  
27 418 fees are given to Steno Diabetes Center Copenhagen.

28  
29 419 **LMR** reports consultancy fees from Bayer.

30  
31 420 **AEF, PK, AL, and MA** are all full-time employees of Bayer.

32  
33 421 **BP** reports consultant fees for AstraZeneca, Bayer, Boehringer Ingelheim, Brainstorm  
34  
35 422 Medical, Cereno Scientific, G3 Pharmaceuticals, KBP Biosciences, PhaseBio, Proton Intel,  
36  
37 423 Sanofi/Lexicon, Sarfez, scPharmaceuticals, SQ Innovation, Tricida, and Vifor/Relypsa; he  
38  
39 424 has stock options for Brainstorm Medical, Cereno Scientific, G3 Pharmaceuticals, KBP  
40  
41 425 Biosciences, Proton Intel, Sarfez, scPharmaceuticals, SQ Innovation, Tricida, and  
42  
43 426 Vifor/Relypsa; he also holds a patent for site-specific delivery of eplerenone to the  
44  
45 427 myocardium (US patent #9931412) and a provisional patent for histone-acetylation-  
46  
47 428 modulating agents for the treatment and prevention of organ injury (provisional patent US  
48  
49 429 63/045,784).

## 430 DATA SHARING STATEMENT

431 Availability of the data underlying this publication will be determined according to Bayer's  
432 commitment to the EFPIA/PhRMA "Principles for responsible clinical trial data sharing". This  
433 pertains to scope, timepoint, and process of data access.

434 As such, Bayer commits to sharing upon request from qualified scientific and medical  
435 researchers, patient-level clinical trial data, study-level clinical trial data, and protocols from  
436 clinical trials in patients for medicines and indications approved in the United States (US) and  
437 European Union (EU) as necessary for conducting legitimate research. This applies to data  
438 on new medicines and indications that have been approved by the EU and US regulatory  
439 agencies on or after January 01, 2014.

440 Interested researchers can use [www.vivli.org](http://www.vivli.org) to request access to anonymized patient-level  
441 data and supporting documents from clinical studies to conduct further research that can  
442 help advance medical science or improve patient care. Information on the Bayer criteria for  
443 listing studies and other relevant information is provided in the member section of the portal.  
444 Data access will be granted to anonymized patient-level data, protocols, and clinical study  
445 reports after approval by an independent scientific review panel. Bayer is not involved in the  
446 decisions made by the independent review panel. Bayer will take all necessary measures to  
447 ensure that patient privacy is safeguarded.

448 **REFERENCES**

- 449 1. Halter JB, Musi N, McFarland Horne F, *et al*. Diabetes and cardiovascular disease in  
450 older adults: Current status and future directions. *Diabetes* 2014;63:2578–89.
- 451 2. Maric-Bilkan C. Sex differences in micro- and macro-vascular complications of  
452 diabetes mellitus. *Clinical science (London, England : 1979)* 2017;131:833–46.
- 453 3. Melsom T, Norvik JV, Enoksen IT, *et al*. Sex differences in age-related loss of kidney  
454 function. *J Am Soc Nephrol* 2022;33:1891–902.
- 455 4. Bairey Merz CN, Dember LM, Ingelfinger JR, *et al*. Sex and the kidneys: Current  
456 understanding and research opportunities. *Nat Rev Nephrol* 2019;15:776–83.
- 457 5. Maric-Bilkan C. Sex differences in diabetic kidney disease. *Mayo Clin Proc*  
458 2020;95:587–99.
- 459 6. Yu MK, Lyles CR, Bent-Shaw LA, *et al*. Risk factor, age and sex differences in  
460 chronic kidney disease prevalence in a diabetic cohort: The Pathways Study. *Am J*  
461 *Nephrol* 2012;36:245–51.
- 462 7. Wiviott SD, Raz I, Bonaca MP, *et al*. Dapagliflozin and cardiovascular outcomes in  
463 type 2 diabetes. *N Engl J Med* 2019;380:347–57.
- 464 8. Heerspink HJL, Stefánsson BV, Correa-Rotter R, *et al*. Dapagliflozin in patients with  
465 chronic kidney disease. *N Engl J Med* 2020;383:1436–46.
- 466 9. Zannad F, Ferreira JP, Pocock SJ, *et al*. Cardiac and kidney benefits of empagliflozin  
467 in heart failure across the spectrum of kidney function: Insights from EMPEROR-  
468 Reduced. *Circulation* 2021;143:310–21.
- 469 10. Perkovic V, Jardine MJ, Neal B, *et al*. Canagliflozin and renal outcomes in type 2  
470 diabetes and nephropathy. *N Engl J Med* 2019;380:2295–306.
- 471 11. Chertow GM, Block GA, Correa-Rotter R, *et al*. Effect of cinacalcet on cardiovascular  
472 disease in patients undergoing dialysis. *N Engl J Med* 2012;367:2482–94.

- 1  
2  
3 473 12. Tuttle KR, Alicic RZ, Duru OK, *et al.* Clinical characteristics of and risk factors for  
4  
5 474 chronic kidney disease among adults and children: An analysis of the CURE-CKD  
6  
7 475 registry. *JAMA Netw Open* 2019;2:e1918169.  
8  
9 476 13. Gasparini A, Evans M, Coresh J, *et al.* Prevalence and recognition of chronic kidney  
10  
11 477 disease in Stockholm healthcare. *Nephrol Dial Transplant* 2016;31:2086–94.  
12  
13 478 14. Buonafine M, Bonnard B, Jaisser F. Mineralocorticoid receptor and cardiovascular  
14  
15 479 disease. *American journal of hypertension* 2018;31:1165–74.  
16  
17 480 15. Luther JM, Fogo AB. The role of mineralocorticoid receptor activation in kidney  
18  
19 481 inflammation and fibrosis. *Kidney Int Suppl* 2022;12:63–8.  
20  
21 482 16. Henschkowski J, Stuck AE, Frey BM, *et al.* Age-dependent decrease in 11beta-  
22  
23 483 hydroxysteroid dehydrogenase type 2 (11beta-HSD2) activity in hypertensive  
24  
25 484 patients. *Am J Hypertens* 2008;21:644–9.  
26  
27 485 17. Kolkhof P, Jaisser F, Kim SY, *et al.* Steroidal and novel non-steroidal  
28  
29 486 mineralocorticoid receptor antagonists in heart failure and cardiorenal diseases:  
30  
31 487 comparison at bench and bedside. *Handb Exp Pharmacol* 2017;243:271–305.  
32  
33 488 18. Pitt B. The role of mineralocorticoid receptor antagonists (MRAs) in very old patients  
34  
35 489 with heart failure. *Heart Fail Rev* 2012;17:573–9.  
36  
37 490 19. Cole TJ, Young MJ. 30 years of the mineralocorticoid receptor: Mineralocorticoid  
38  
39 491 receptor null mice: Informing cell-type-specific roles. *J Endocrinol* 2017;234:T83–T92.  
40  
41 492 20. Nakamura T, Girerd S, Jaisser F, *et al.* Nonepithelial mineralocorticoid receptor  
42  
43 493 activation as a determinant of kidney disease. *Kidney Int Suppl* 2022;12:12–8.  
44  
45 494 21. Wheeler DC, Stefánsson BV, Jongs N, *et al.* Effects of dapagliflozin on major adverse  
46  
47 495 kidney and cardiovascular events in patients with diabetic and non-diabetic chronic  
48  
49 496 kidney disease: A prespecified analysis from the DAPA-CKD trial. *The lancet*  
50  
51 497 *Diabetes & endocrinology* 2021;9:22–31.  
52  
53 498 22. Mann JFE, Fonseca V, Mosenzon O, *et al.* Effects of liraglutide versus placebo on  
54  
55 499 cardiovascular events in patients with type 2 diabetes mellitus and chronic kidney  
56  
57 500 disease. *Circulation* 2018;138:2908–18.

- 1  
2  
3 501 23. Agarwal R, Filippatos G, Pitt B, *et al.* Cardiovascular and kidney outcomes with  
4  
5 502 finerenone in patients with type 2 diabetes and chronic kidney disease: the FIDELITY  
6  
7 503 pooled analysis. *European heart journal* 2022;43:474–84.  
8  
9 504 24. Bakris GL, Agarwal R, Anker SD, *et al.* Effect of finerenone on chronic kidney disease  
10  
11 505 outcomes in type 2 diabetes. *N Engl J Med* 2020;383:2219–29.  
12  
13 506 25. Pitt B, Filippatos G, Agarwal R, *et al.* Cardiovascular events with finerenone in kidney  
14  
15 507 disease and type 2 diabetes. *N Engl J Med* 2021;385:2252–63.  
16  
17 508 26. McKinlay SM, Brambilla DJ, Posner JG. The normal menopause transition. *Maturitas*  
18  
19 509 1992;14:103–15.  
20  
21 510 27. Kleinbaum DG, Klein M. The stratified Cox procedure. In: Kleinbaum DG, Klein M  
22  
23 511 eds. *Survival analysis: A self-learning text*. New York, NY: Springer New York  
24  
25 512 2012:201–40.  
26  
27 513 28. Therneau TM, Grambsch PM. The Cox model. In: Therneau TM, Grambsch PM eds.  
28  
29 514 *Modeling survival data: Extending the Cox model*. New York, NY: Springer New York  
30  
31 515 2000:39–77.  
32  
33 516 29. Vonesh E, Tighiouart H, Ying J, *et al.* Mixed-effects models for slope-based endpoints  
34  
35 517 in clinical trials of chronic kidney disease. *Stat Med* 2019;38:4218–39.  
36  
37 518 30. Eissing T, Gouloze SC, van den Berg P, *et al.* Pharmacokinetics and  
38  
39 519 pharmacodynamics of finerenone in patients with chronic kidney disease and type 2  
40  
41 520 diabetes: Insights based on FIGARO-DKD and FIDELIO-DKD. *Diabetes, obesity &*  
42  
43 521 *metabolism* 2023: doi:10.1111/dom.15387.  
44  
45 522 31. Vardeny O, Claggett B, Vaduganathan M, *et al.* Influence of age on efficacy and  
46  
47 523 safety of spironolactone in heart failure. *JACC Heart failure* 2019;7:1022–8.  
48  
49 524 32. Ferreira JP, Rossello X, Eschalier R, *et al.* MRAs in elderly HF patients: Individual  
50  
51 525 patient-data meta-analysis of RALES, EMPHASIS-HF, and TOPCAT. *JACC Heart*  
52  
53 526 *failure* 2019;7:1012–21.  
54  
55  
56  
57  
58  
59  
60

- 1  
2  
3 527 33. Rossello X, Ferreira JP, Pocock SJ, *et al.* Sex differences in mineralocorticoid  
4  
5 528 receptor antagonist trials: A pooled analysis of three large clinical trials. *European*  
6  
7 529 *journal of heart failure* 2020;22:834–44.  
8  
9 530 34. Nakamaru R, Yamamoto K, Akasaka H, *et al.* Sex differences in renal outcomes after  
10  
11 531 medical treatment for bilateral primary aldosteronism. *Hypertension* 2021;77:537–45.  
12  
13 532 35. Kawanami D, Takashi Y, Muta Y, *et al.* Mineralocorticoid receptor antagonists in  
14  
15 533 diabetic kidney disease. *Front Pharmacol* 2021;12:754239.  
16  
17 534 36. Agarwal R, Joseph A, Anker SD, *et al.* Hyperkalemia risk with finerenone: results  
18  
19 535 from the FIDELIO-DKD trial. *J Am Soc Nephrol* 2022;33:225–37.  
20  
21 536 37. Hasegawa T, Nishiwaki H, Ota E, *et al.* Aldosterone antagonists for people with  
22  
23 537 chronic kidney disease requiring dialysis. *Cochrane Database of Systematic Reviews*  
24  
25 538 2021;2:Cd013109.  
26  
27 539 38. Kolkhof P, Joseph A, Kintscher U. Nonsteroidal mineralocorticoid receptor  
28  
29 540 antagonism for cardiovascular and renal disorders – new perspectives for  
30  
31 541 combination therapy. *Pharmacol Res* 2021;172:105859.  
32  
33 542 39. Davel AP, Jaffe IZ, Tostes RC, *et al.* New roles of aldosterone and mineralocorticoid  
34  
35 543 receptors in cardiovascular disease: Translational and sex-specific effects. *Am J*  
36  
37 544 *Physiol Heart Circ Physiol* 2018;315:H989–H99.  
38  
39 545 40. Faulkner JL, Kennard S, Huby AC, *et al.* Progesterone predisposes females to  
40  
41 546 obesity-associated leptin-mediated endothelial dysfunction via upregulating  
42  
43 547 endothelial MR (mineralocorticoid receptor) expression. *Hypertension* 2019;74:678–  
44  
45 548 86.  
46  
47 549 41. Krug AW, Allenhofer L, Monticone R, *et al.* Elevated mineralocorticoid receptor  
48  
49 550 activity in aged rat vascular smooth muscle cells promotes a proinflammatory  
50  
51 551 phenotype via extracellular signal-regulated kinase 1/2 mitogen-activated protein  
52  
53 552 kinase and epidermal growth factor receptor-dependent pathways. *Hypertension*  
54  
55 553 2010;55:1476–83.  
56  
57  
58  
59  
60



- 1  
2  
3 554 42. DuPont JJ, Kim SK, Kenney RM, *et al.* Sex differences in the time course and  
4  
5 555 mechanisms of vascular and cardiac aging in mice: Role of the smooth muscle cell  
6  
7 556 mineralocorticoid receptor. *Am J Physiol Heart Circ Physiol* 2021;320:H169–H80.  
8  
9 557 43. Ibarrola J, Kim SK, Lu Q, *et al.* Smooth muscle mineralocorticoid receptor as an  
10  
11 558 epigenetic regulator of vascular aging. *Cardiovascular research* 2023;118:3386–400.  
12  
13 559 44. Mathur R, Dreyer G, Yaqoob MM, *et al.* Ethnic differences in the progression of  
14  
15 560 chronic kidney disease and risk of death in a UK diabetic population: An  
16  
17 561 observational cohort study. *BMJ Open* 2018;8:e020145.  
18  
19 562 45. Go AS, Yang J, Tan TC, *et al.* Contemporary rates and predictors of fast progression  
20  
21 563 of chronic kidney disease in adults with and without diabetes mellitus. *BMC Nephrol*  
22  
23 564 2018;19:146.  
24  
25  
26 565

## FIGURE LEGENDS

**Figure 1.** Analysis of CV composite outcome and HHF according to (A) age and (B) sex.

CV composite outcome includes CV death, nonfatal myocardial infarction, nonfatal stroke, or HHF.

CI = confidence interval; CV = cardiovascular; HHF = hospitalization for heart failure; PY = patient-years.

**Figure 2.** Analysis of kidney composite outcome according to (A) age and (B) sex.

Kidney composite outcome includes kidney failure, sustained  $\geq 57\%$  eGFR decline, or renal death.

CI = confidence interval; eGFR = estimated glomerular filtration rate; PY = patient-years.

**Figure 3.** LS mean change in eGFR from baseline, chronic, and total slopes over time by age.

Chronic eGFR slope from month 4 to end-of-study visit.

CI = confidence interval; eGFR = estimated glomerular filtration rate; LS = least-squares.

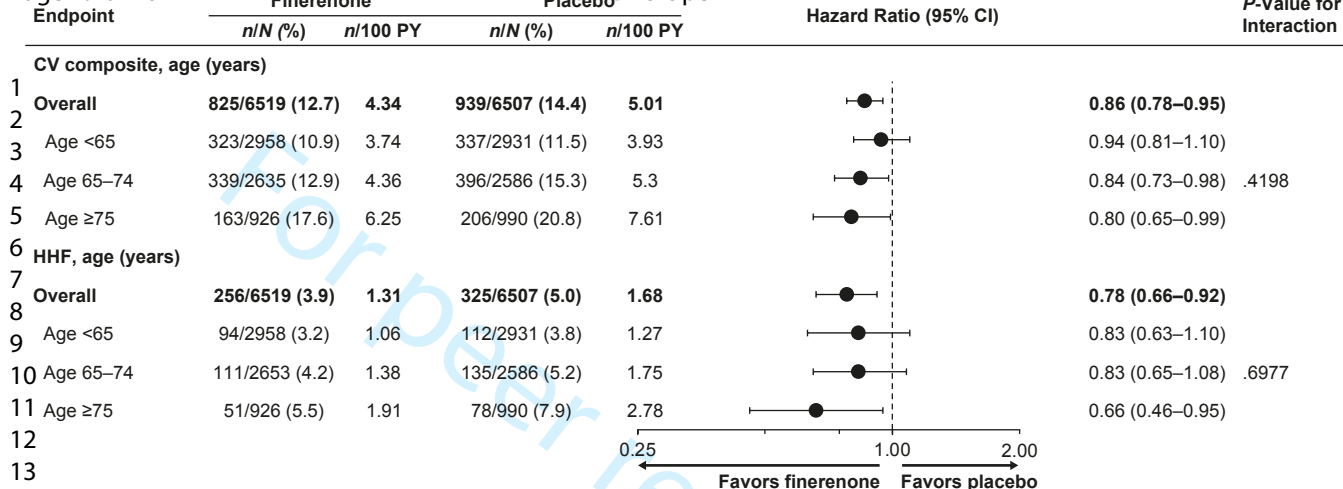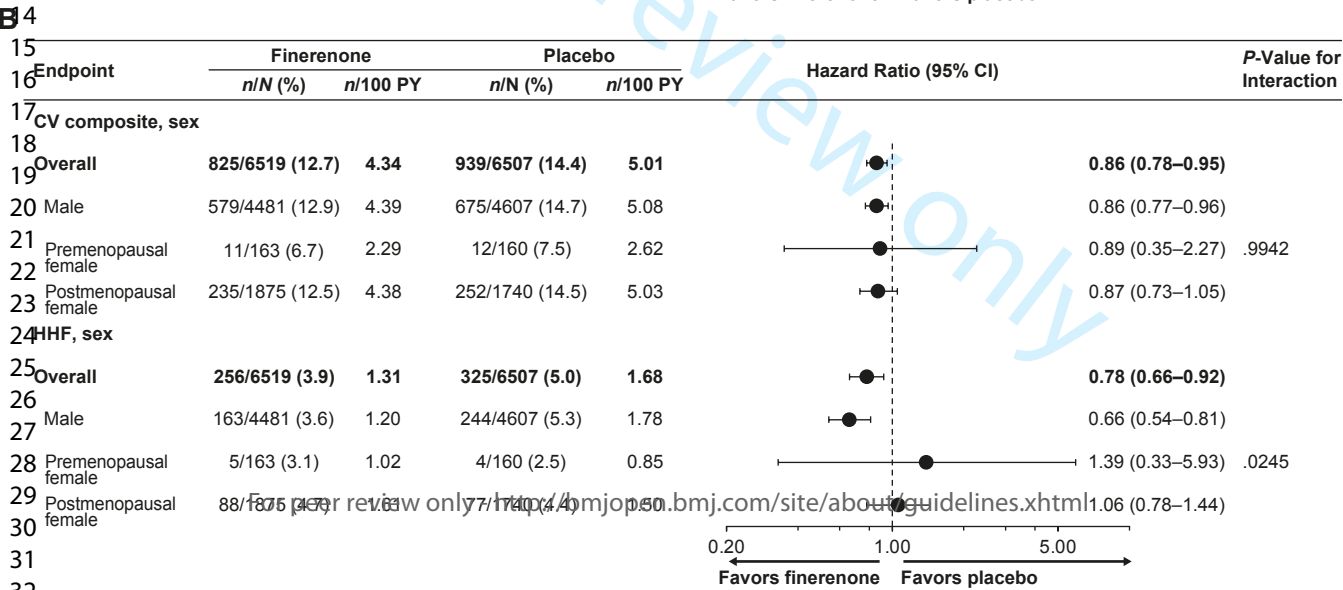

A

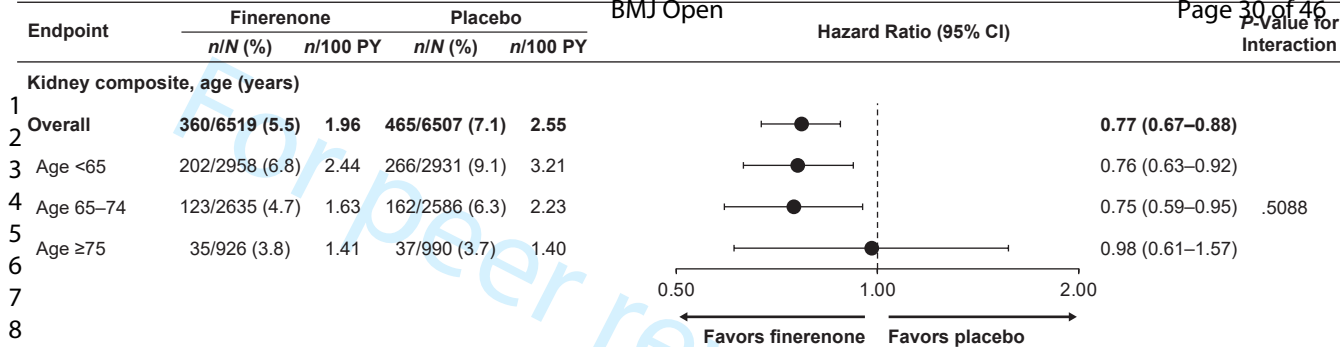

B



BMJ Open



**Number of Subjects at Visit**

|            |      |      |      |      |      |      |      |      |      |      |      |     |     |
|------------|------|------|------|------|------|------|------|------|------|------|------|-----|-----|
| Finerenone | 2921 | 2849 | 2778 | 2730 | 2656 | 2505 | 2281 | 1918 | 1541 | 1246 | 962  | 716 | 409 |
| Placebo    | 2892 | 2829 | 2779 | 2719 | 2649 | 2491 | 2226 | 1952 | 1566 | 1271 | 1006 | 731 | 417 |

B 65 to 74 Years

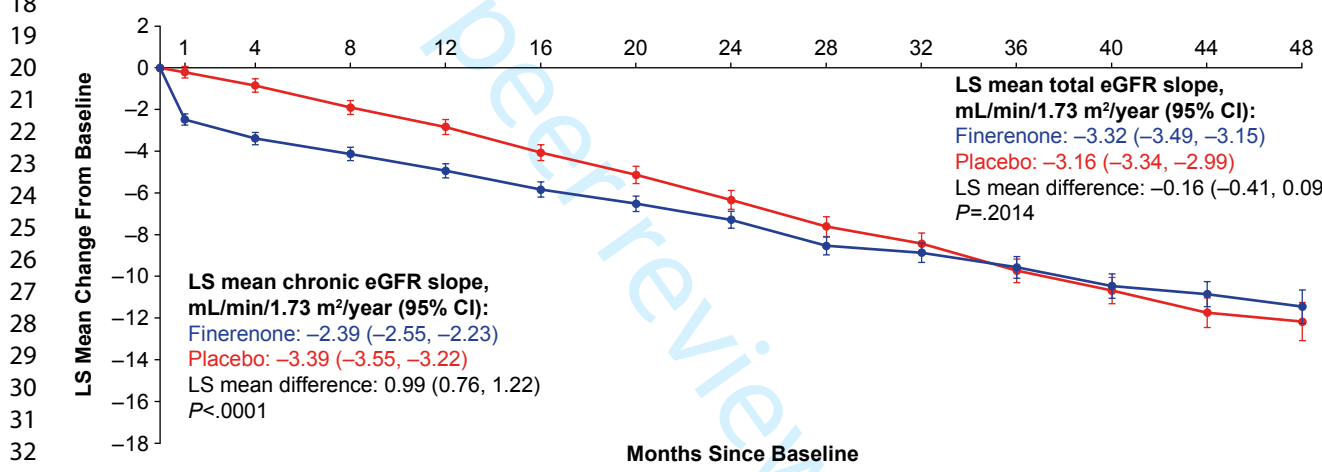

**Number of Subjects at Visit**

|            |      |      |      |      |      |      |      |      |      |      |     |     |     |
|------------|------|------|------|------|------|------|------|------|------|------|-----|-----|-----|
| Finerenone | 2597 | 2536 | 2474 | 2460 | 2388 | 2220 | 1995 | 1732 | 1462 | 1158 | 935 | 663 | 387 |
| Placebo    | 2539 | 2481 | 2429 | 2376 | 2326 | 2163 | 1951 | 1674 | 1360 | 1097 | 876 | 637 | 346 |

C ≥75 Years

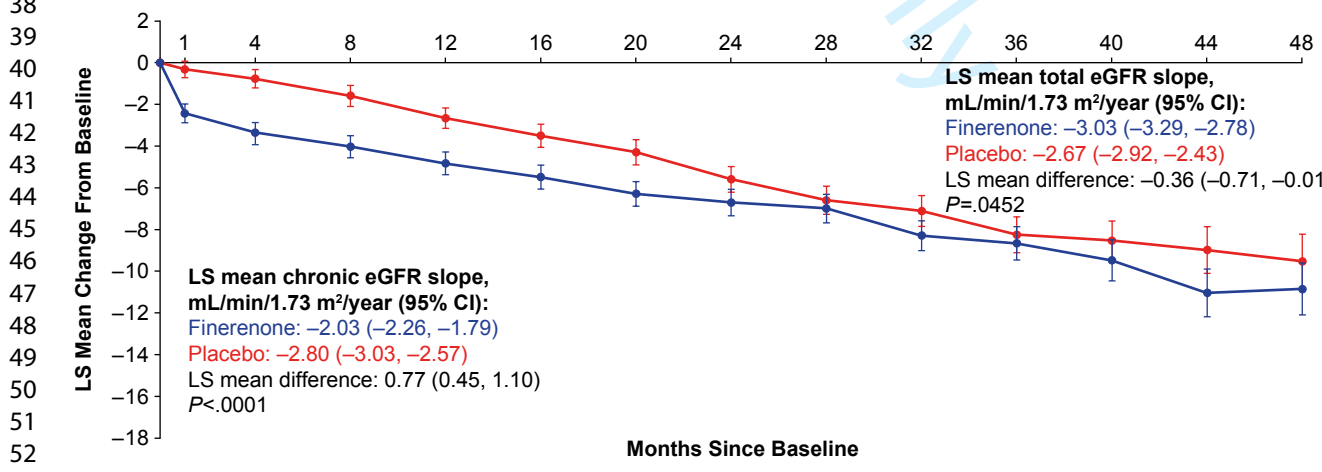

**Number of Subjects at Visit**

|            |     |     |     |     |     |     |     |     |     |     |     |     |     |
|------------|-----|-----|-----|-----|-----|-----|-----|-----|-----|-----|-----|-----|-----|
| Finerenone | 910 | 877 | 848 | 825 | 792 | 732 | 647 | 567 | 447 | 363 | 277 | 210 | 115 |
| Placebo    | 975 | 934 | 919 | 896 | 850 | 780 | 696 | 578 | 461 | 359 | 281 | 204 | 117 |

# Finerenone Cardiovascular and Kidney Outcomes by Age and Sex: FIDELITY Post Hoc Analysis of Two Phase 3, Multicenter, Double-Blind Trials

## Contents

|                                                                                                                                                                                                                                                            |    |
|------------------------------------------------------------------------------------------------------------------------------------------------------------------------------------------------------------------------------------------------------------|----|
| Finerenone Cardiovascular and Kidney Outcomes by Age and Sex: FIDELITY Post Hoc Analysis of Two Phase 3, Multicenter, Double-Blind Trials .....                                                                                                            | 1  |
| Supplementary Tables and Figures .....                                                                                                                                                                                                                     | 2  |
| <b>eTable 1.</b> Patient Baseline Characteristics According to Age and Sex Stratified by Treatment Group .....                                                                                                                                             | 2  |
| <b>eTable 2.</b> Treatment-Emergent AEs According to Age and Sex .....                                                                                                                                                                                     | 6  |
| <b>eFigure 1.</b> Analysis of CV composite outcome and subcomponents according to (A) age and (B) sex .....                                                                                                                                                | 8  |
| <b>eFigure 2.</b> Hazard ratio (finerenone vs placebo) as a function of age modeled with cubic splines for CV composite outcome by age (A), spline for hazard ratio of CV composite outcomes by sex (B, C), and age distribution by sex (D). .....         | 11 |
| <b>eFigure 3.</b> Hazard ratio (finerenone vs placebo) as a function of age modeled with cubic splines for kidney composite outcome by age (A), spline for hazard ratio of kidney composite outcomes by sex (B, C), and age distribution by sex (D). ..... | 12 |
| <b>eFigure 4.</b> LS mean change in eGFR from baseline, chronic, and total slopes over time by sex .....                                                                                                                                                   | 13 |
| <b>eFigure 5.</b> LS mean ratio to baseline UACR over time by age and sex .....                                                                                                                                                                            | 14 |
| <b>eFigure 6.</b> Relative risk of treatment-emergent hyperkalemia causing permanent discontinuation of study drug by age and sex .....                                                                                                                    | 15 |
| <b>eFigure 7.</b> FIDELITY CONSORT diagram. ....                                                                                                                                                                                                           | 16 |

### Supplementary Tables and Figures

**eTable 1.** Patient Baseline Characteristics According to Age and Sex Stratified by Treatment Group

| n (%)                                     | All          |              | Age          |              |              |              |              |              | Sex          |              |                        |              |                         |              |
|-------------------------------------------|--------------|--------------|--------------|--------------|--------------|--------------|--------------|--------------|--------------|--------------|------------------------|--------------|-------------------------|--------------|
|                                           |              |              | <65 Years    |              | 65–74 Years  |              | ≥75 Years    |              | Male         |              | Female (Premenopausal) |              | Female (Postmenopausal) |              |
|                                           | FIN (n=6519) | PBO (n=6507) | FIN (n=2958) | PBO (n=2931) | FIN (n=2635) | PBO (n=2586) | FIN (n=926)  | PBO (n=990)  | FIN (n=4481) | PBO (n=4607) | FIN (n=163)            | PBO (n=160)  | FIN (n=1875)            | PBO (n=1740) |
| Age, y, mean ± SD                         | 64.7 ± 9.4   | 64.8 ± 9.7   | 56.5 ± 6.4   | 56.3 ± 6.7   | 69.1 ± 2.7   | 69.2 ± 2.8   | 78.4 ± 3.0   | 78.4 ± 3.1   | 64.8 ± 9.3   | 64.9 ± 9.6   | 45.3 ± 4.4             | 44.9 ± 5.4   | 66.2 ± 8.0              | 66.4 ± 8.0   |
| Sex, n (%)                                |              |              |              |              |              |              |              |              |              |              |                        |              |                         |              |
| Female                                    | 2038 (31.3)  | 1900 (29.2)  | 959 (32.4)   | 880 (30.0)   | 772 (29.3)   | 729 (28.2)   | 307 (33.2)   | 291 (29.4)   | 0 (0.0)      | 0 (0.0)      | 163 (100)              | 160 (100)    | 1875 (100)              | 1740 (100)   |
| Male                                      | 4481 (68.7)  | 4607 (70.8)  | 1999 (67.6)  | 2051 (70.0)  | 1863 (70.7)  | 1857 (71.8)  | 619 (66.8)   | 699 (70.6)   | 4481 (100)   | 4607 (100)   | 0 (0.0)                | 0 (0.0)      | 0 (0.0)                 | 0 (0.0)      |
| Race, n (%)                               |              |              |              |              |              |              |              |              |              |              |                        |              |                         |              |
| Asian                                     | 1432 (22.0)  | 1462 (22.5)  | 772 (26.1)   | 819 (27.9)   | 518 (19.7)   | 479 (18.5)   | 142 (15.3)   | 164 (16.6)   | 1032 (23.0)  | 1104 (24.0)  | 45 (27.6)              | 42 (26.3)    | 355 (18.9)              | 316 (18.2)   |
| Black/African American                    | 253 (3.9)    | 269 (4.1)    | 158 (5.3)    | 151 (5.2)    | 75 (2.8)     | 85 (3.3)     | 20 (2.2)     | 33 (3.3)     | 137 (3.1)    | 147 (3.2)    | 17 (10.4)              | 20 (12.5)    | 99 (5.3)                | 102 (5.9)    |
| White                                     | 4449 (68.2)  | 4420 (67.9)  | 1827 (61.8)  | 1765 (60.2)  | 1908 (72.4)  | 1909 (73.8)  | 714 (77.1)   | 746 (75.4)   | 3099 (69.2)  | 3132 (68.0)  | 84 (51.5)              | 83 (51.9)    | 1266 (67.5)             | 1205 (69.3)  |
| Other <sup>a</sup>                        | 385 (5.9)    | 356 (5.5)    | 201 (6.8)    | 196 (6.7)    | 134 (5.1)    | 113 (4.4)    | 50 (5.4)     | 47 (4.7)     | 213 (4.8)    | 224 (4.9)    | 17 (10.4)              | 15 (9.4)     | 155 (8.3)               | 117 (6.7)    |
| Systolic blood pressure, mm Hg, mean (SD) | 136.8 ± 14.2 | 136.7 ± 14.3 | 135.7 ± 13.9 | 135.5 ± 14.1 | 137.4 ± 14.2 | 137.5 ± 14.2 | 138.4 ± 14.6 | 138.5 ± 14.6 | 136.9 ± 14.1 | 136.7 ± 14.3 | 131.6 ± 13.1           | 134.4 ± 14.7 | 136.8 ± 14.4            | 136.9 ± 14.0 |
| Diastolic blood pressure,                 | 76.3 ± 9.6   | 76.4 ± 9.6   | 78.7 ± 9.2   | 79.0 ± 8.9   | 74.8 ± 9.4   | 74.9 ± 9.4   | 73.2 ± 9.8   | 72.4 ± 9.8   | 76.6 ± 9.7   | 76.5 ± 9.7   | 78.7 ± 8.2             | 81.6 ± 8.4   | 75.6 ± 9.6              | 75.6 ± 9.4   |

| n (%)                                                 | All                  |                      | Age                  |                      |                      |                      |                      |                     | Sex                  |                      |                        |                      |                         |                      |
|-------------------------------------------------------|----------------------|----------------------|----------------------|----------------------|----------------------|----------------------|----------------------|---------------------|----------------------|----------------------|------------------------|----------------------|-------------------------|----------------------|
|                                                       |                      |                      | <65 Years            |                      | 65–74 Years          |                      | ≥75 Years            |                     | Male                 |                      | Female (Premenopausal) |                      | Female (Postmenopausal) |                      |
|                                                       | FIN (n=6519)         | PBO (n=6507)         | FIN (n=2958)         | PBO (n=2931)         | FIN (n=2635)         | PBO (n=2586)         | FIN (n=926)          | PBO (n=990)         | FIN (n=4481)         | PBO (n=4607)         | FIN (n=163)            | PBO (n=160)          | FIN (n=1875)            | PBO (n=1740)         |
| mm Hg, mean (SD)                                      |                      |                      |                      |                      |                      |                      |                      |                     |                      |                      |                        |                      |                         |                      |
| Duration of diabetes, y, mean (SD)                    | 15.4 ± 8.7           | 15.4 ± 8.7           | 13.6 ± 7.6           | 13.3 ± 7.7           | 16.4 ± 8.7           | 16.5 ± 8.5           | 18.7 ± 10.7          | 18.5 ± 10.2         | 15.4 ± 8.6           | 15.3 ± 8.4           | 11.0 ± 7.4             | 10.1 ± 6.5           | 15.9 ± 9.0              | 16.0 ± 9.2           |
| HbA1c, %, mean (SD)                                   | 7.7 ± 1.4            | 7.7 ± 1.4            | 7.9 ± 1.5            | 7.9 ± 1.5            | 7.6 ± 1.3            | 7.6 ± 1.3            | 7.5 ± 1.2            | 7.4 ± 1.2           | 7.6 ± 1.3            | 7.6 ± 1.3            | 8.1 ± 1.7              | 8.3 ± 1.6            | 7.9 ± 1.4               | 7.9 ± 1.5            |
| Serum potassium, mmol/L, mean (SD)                    | 4.4 ± 0.4            | 4.4 ± 0.4            | 4.3 ± 0.4            | 4.4 ± 0.5            | 4.4 ± 0.4            | 4.4 ± 0.4            | 4.4 ± 0.4            | 4.4 ± 0.4           | 4.3 ± 0.4            | 4.3 ± 0.5            | 4.3 ± 0.4              | 4.4 ± 0.4            | 4.4 ± 0.4               | 4.4 ± 0.4            |
| eGFR, mL/min/1.73 m <sup>2</sup> , mean (SD)          | 57.5 ± 21.6          | 57.7 ± 21.8          | 63.9 ± 23.9          | 64.6 ± 24.0          | 53.7 ± 18.4          | 53.3 ± 18.6          | 48.0 ± 15.5          | 48.3 ± 14.8         | 57.8 ± 21.0          | 57.7 ± 21.4          | 76.3 ± 28.7            | 77.5 ± 29.1          | 55.3 ± 21.5             | 55.8 ± 21.1          |
| eGFR, mL/min/1.73 m <sup>2</sup> , n (%) <sup>b</sup> |                      |                      |                      |                      |                      |                      |                      |                     |                      |                      |                        |                      |                         |                      |
| <25                                                   | 81 (1.2)             | 81 (1.2)             | 24 (0.8)             | 29 (1.0)             | 35 (1.3)             | 37 (1.4)             | 22 (2.4)             | 15 (1.5)            | 44 (1.0)             | 54 (1.2)             | 0                      | 2 (1.3)              | 37 (2.0)                | 25 (1.4)             |
| 25–<45                                                | 2117 (32.5)          | 2115 (32.5)          | 744 (25.2)           | 704 (24.0)           | 937 (35.6)           | 961 (37.2)           | 436 (47.1)           | 450 (45.5)          | 1392 (31.1)          | 1479 (32.1)          | 31 (19.0)              | 26 (16.3)            | 694 (37.0)              | 610 (35.1)           |
| 45–<60                                                | 1717 (26.3)          | 1717 (26.4)          | 666 (22.5)           | 649 (22.1)           | 775 (29.4)           | 739 (28.6)           | 276 (29.8)           | 329 (33.2)          | 1240 (27.7)          | 1228 (26.7)          | 26 (16.0)              | 24 (15.0)            | 451 (24.1)              | 465 (26.7)           |
| ≥60                                                   | 2603 (39.9)          | 2592 (39.8)          | 1523 (51.5)          | 1548 (52.8)          | 888 (33.7)           | 848 (32.8)           | 192 (20.7)           | 196 (19.8)          | 1805 (40.3)          | 1846 (40.1)          | 106 (65.0)             | 108 (67.5)           | 692 (36.9)              | 638 (36.7)           |
| UACR, mg/g, median (Q1–Q3)                            | 514.2 (197.5–1129.4) | 514.9 (198.2–1163.4) | 649.2 (308.0–1331.8) | 651.4 (322.5–1382.2) | 433.8 (150.7–1025.7) | 441.3 (157.8–1032.8) | 325.6 (107.00–802.7) | 340.5 (109.8–871.7) | 514.5 (205.3–1116.5) | 509.2 (195.4–1143.0) | 733.0 (336.3–1522.7)   | 868.4 (398.5–1604.2) | 496.4 (169.9–1124.4)    | 509.1 (185.0–1174.5) |
| UACR, mg/g, n (%) <sup>c</sup>                        |                      |                      |                      |                      |                      |                      |                      |                     |                      |                      |                        |                      |                         |                      |
| <30                                                   | 120 (1.8)            | 110 (1.7)            | 39 (1.3)             | 40 (1.4)             | 53 (2.0)             | 50 (1.9)             | 28 (3.0)             | 20 (2.0)            | 69 (1.5)             | 68 (1.5)             | 2 (1.2)                | 1 (0.6)              | 49 (2.6)                | 41 (2.4)             |
| 30–<300                                               | 2076 (31.8)          | 2023 (31.1)          | 686 (23.2)           | 645 (22.0)           | 971 (36.9)           | 936 (36.2)           | 419 (45.2)           | 442 (44.6)          | 1422 (31.7)          | 1459 (31.7)          | 34 (20.9)              | 20 (12.5)            | 620 (33.1)              | 544 (31.3)           |



| n (%)                                         | All          |              | Age          |              |              |              |             |             | Sex          |              |                        |             |                         |              |
|-----------------------------------------------|--------------|--------------|--------------|--------------|--------------|--------------|-------------|-------------|--------------|--------------|------------------------|-------------|-------------------------|--------------|
|                                               |              |              | <65 Years    |              | 65–74 Years  |              | ≥75 Years   |             | Male         |              | Female (Premenopausal) |             | Female (Postmenopausal) |              |
|                                               | FIN (n=6519) | PBO (n=6507) | FIN (n=2958) | PBO (n=2931) | FIN (n=2635) | PBO (n=2586) | FIN (n=926) | PBO (n=990) | FIN (n=4481) | PBO (n=4607) | FIN (n=163)            | PBO (n=160) | FIN (n=1875)            | PBO (n=1740) |
| ≥300                                          | 4321 (66.3)  | 4371 (67.2)  | 2231 (75.4)  | 2244 (76.6)  | 1611 (61.1)  | 1599 (61.8)  | 479 (51.7)  | 528 (53.3)  | 2989 (66.7)  | 3079 (66.8)  | 127 (77.9)             | 139 (86.9)  | 1205 (64.3)             | 1153 (66.3)  |
| BMI, kg/m <sup>2</sup> , mean (SD)            | 31.3 ± 6.0   | 31.3 ± 6.0   | 32.1 ± 6.5   | 32.0 ± 6.3   | 31.1 ± 5.7   | 31.1 ± 5.7   | 29.5 ± 4.8  | 29.6 ± 5.1  | 30.9 ± 5.6   | 30.9 ± 5.6   | 34.0 ± 7.9             | 34.3 ± 7.9  | 32.0 ± 6.7              | 32.1 ± 6.5   |
| Current smoker, n (%)                         | 1065 (16.3)  | 1028 (15.8)  | 657 (22.2)   | 626 (21.4)   | 351 (13.3)   | 335 (13.0)   | 57 (6.2)    | 67 (6.8)    | 874 (19.5)   | 856 (18.6)   | 17 (10.4)              | 18 (11.3)   | 174 (9.3)               | 154 (8.9)    |
| History of CV disease, present, n (%)         | 2979 (45.7)  | 2956 (45.4)  | 1127 (38.1)  | 1061 (36.2)  | 1330 (50.5)  | 1337 (51.7)  | 522 (56.4)  | 558 (56.4)  | 2152 (48.0)  | 2222 (48.2)  | 36 (22.1)              | 20 (12.5)   | 791 (42.2)              | 714 (41.0)   |
| History of heart failure                      | 485 (7.4)    | 522 (8.0)    | 211 (7.1)    | 202 (6.9)    | 192 (7.3)    | 240 (9.3)    | 82 (8.9)    | 80 (8.1)    | 302 (6.7)    | 328 (7.1)    | 11 (6.7)               | 11 (6.9)    | 172 (9.2)               | 183 (10.5)   |
| History of atrial fibrillation/atrial flutter | 568 (8.7)    | 538 (8.3)    | 144 (4.9)    | 122 (4.2)    | 280 (10.6)   | 267 (10.3)   | 144 (15.6)  | 149 (15.1)  | 439 (9.8)    | 428 (9.3)    | 0                      | 0           | 129 (6.9)               | 110 (6.3)    |
| Baseline medications, n (%) <sup>d</sup>      |              |              |              |              |              |              |             |             |              |              |                        |             |                         |              |
| RAS inhibitors (ACEis/ARBs)                   | 6508 (99.8)  | 6495 (99.8)  | 2951 (99.8)  | 2925 (99.8)  | 2631 (99.8)  | 2582 (99.8)  | 926 (100.0) | 988 (99.8)  | 4473 (99.8)  | 4596 (99.8)  | 163 (100.0)            | 160 (100.0) | 1872 (99.8)             | 1739 (>99.9) |
| Beta-blockers                                 | 3236 (49.6)  | 3268 (50.2)  | 1311 (44.3)  | 1308 (44.6)  | 1419 (53.9)  | 1430 (55.3)  | 506 (54.6)  | 530 (53.5)  | 2237 (49.9)  | 2308 (50.1)  | 57 (35.0)              | 54 (33.8)   | 942 (50.2)              | 906 (52.1)   |
| Diuretics                                     | 3325 (51.0)  | 3385 (52.0)  | 1378 (46.6)  | 1412 (48.2)  | 1412 (53.6)  | 1401 (54.2)  | 535 (57.8)  | 572 (57.8)  | 2320 (51.8)  | 2386 (51.8)  | 67 (41.1)              | 70 (43.8)   | 938 (50.0)              | 929 (53.4)   |
| Statins                                       | 4657 (71.4)  | 4742 (72.9)  | 1993 (67.4)  | 2040 (69.6)  | 1975 (75.0)  | 1945 (75.2)  | 689 (74.4)  | 757 (76.5)  | 3291 (73.4)  | 3405 (73.9)  | 93 (57.1)              | 110 (68.8)  | 1273 (67.9)             | 1227 (70.5)  |
| Calcium channel blockers                      | 3664 (56.2)  | 3694 (56.8)  | 1564 (52.9)  | 1563 (53.3)  | 1544 (58.6)  | 1508 (58.3)  | 556 (60.0)  | 623 (62.9)  | 2554 (57.0)  | 2654 (57.6)  | 74 (45.4%)             | 75 (46.9)   | 1036 (55.3)             | 965 (55.5)   |
| ≥1 glucose-lowering medication                | 6354 (97.5)  | 6366 (97.8)  | 2898 (98.0)  | 2881 (98.3)  | 2574 (97.7)  | 2537 (98.1)  | 882 (95.2)  | 948 (95.8)  | 4361 (97.3)  | 4499 (97.7)  | 161 (98.8)             | 156 (97.5)  | 1832 (97.7)             | 1711 (98.3)  |

| n (%)              | All             |                 | Age             |                 |                 |                 |                |                | Sex             |                 |                        |                |                         |                 |
|--------------------|-----------------|-----------------|-----------------|-----------------|-----------------|-----------------|----------------|----------------|-----------------|-----------------|------------------------|----------------|-------------------------|-----------------|
|                    |                 |                 | <65 Years       |                 | 65–74 Years     |                 | ≥75 Years      |                | Male            |                 | Female (Premenopausal) |                | Female (Postmenopausal) |                 |
|                    | FIN<br>(n=6519) | PBO<br>(n=6507) | FIN<br>(n=2958) | PBO<br>(n=2931) | FIN<br>(n=2635) | PBO<br>(n=2586) | FIN<br>(n=926) | PBO<br>(n=990) | FIN<br>(n=4481) | PBO<br>(n=4607) | FIN<br>(n=163)         | PBO<br>(n=160) | FIN<br>(n=1875)         | PBO<br>(n=1740) |
| n (%) <sup>d</sup> |                 |                 |                 |                 |                 |                 |                |                |                 |                 |                        |                |                         |                 |
| Insulin            | 3866<br>(59.3)  | 3764<br>(57.8)  | 1848<br>(62.5)  | 1789<br>(61.0)  | 1539<br>(58.4)  | 1481<br>(57.3)  | 479<br>(51.7)  | 494<br>(49.9)  | 2598<br>(58.0)  | 2605<br>(56.5)  | 94<br>(57.7)           | 99<br>(61.9)   | 1174<br>(62.6)          | 1060<br>(60.9)  |
| GLP-1RA            | 497<br>(7.6)    | 447<br>(6.9)    | 273<br>(9.2)    | 219<br>(7.5)    | 190<br>(7.2)    | 188<br>(7.3)    | 34<br>(3.7)    | 40<br>(4.0)    | 359<br>(8.0)    | 317<br>(6.9)    | 12<br>(7.4)            | 18<br>(11.3)   | 126<br>(6.7)            | 112<br>(6.4)    |
| SGLT-2i            | 438<br>(6.7)    | 439<br>(6.7)    | 251<br>(8.5)    | 266<br>(9.1)    | 149<br>(5.7)    | 140<br>(5.4)    | 38<br>(4.1)    | 33<br>(3.3)    | 331<br>(7.4)    | 340<br>(7.4)    | 19<br>(11.7)           | 17<br>(10.6)   | 88<br>(4.7)             | 82<br>(4.7)     |

ACEi = angiotensin-converting enzyme inhibitor; ARB = angiotensin receptor blocker; BMI = body mass index; CV = cardiovascular; eGFR = estimated

glomerular filtration rate; FIN = finerenone; GLP-1RA = glucagon-like peptide-1 receptor agonist; HbA1c = glycated hemoglobin; PBO = placebo; Q = quartile;

RAS = renin–angiotensin system; SD = standard deviation; SGLT-2i = sodium-glucose co-transporter-2 inhibitor; UACR = urine albumin-to-creatinine ratio.

Values are based on available data.

<sup>a</sup> Other: included American Indian/Alaska Native, Native Hawaiian/other Pacific, not reported, multiple.

<sup>b</sup> Missing (eGFR): <65 years, *n*=2; 65 to 74 years, *n*=1; postmenopausal female, *n*=3.

<sup>c</sup> Missing (UACR): <65 years, *n*=4; 65 to 74 years, *n*=1; male, *n*=2; postmenopausal female, *n*=3.

<sup>d</sup> Analysis allowed multiple drug groups for the same drug.

**eTable 2.** Treatment-Emergent AEs According to Age and Sex

| n (%)                                                      | ALL          |              | Age          |              |              |              |             |             | Sex          |              |                        |             |                         |              |
|------------------------------------------------------------|--------------|--------------|--------------|--------------|--------------|--------------|-------------|-------------|--------------|--------------|------------------------|-------------|-------------------------|--------------|
|                                                            |              |              | <65 Years    |              | 65–74 Years  |              | ≥75 Years   |             | Male         |              | Female (Premenopausal) |             | Female (Postmenopausal) |              |
|                                                            | FIN (n=6510) | PBO (n=6489) | FIN (n=2953) | PBO (n=2926) | FIN (n=2631) | PBO (n=2578) | FIN (n=926) | PBO (n=985) | FIN (n=4476) | PBO (n=4595) | FIN (n=163)            | PBO (n=160) | FIN (n=1871)            | PBO (n=1734) |
| Any AE                                                     | 5602 (86.1)  | 5607 (86.4)  | 2494 (84.5)  | 2523 (86.2)  | 2301 (87.5)  | 2225 (86.3)  | 807 (87.1)  | 859 (87.2)  | 3899 (87.1)  | 4011 (87.3)  | 137 (84.0)             | 138 (86.3)  | 1566 (83.7)             | 1458 (84.1)  |
| Related to study drug                                      | 1206 (18.5)  | 862 (13.3)   | 478 (16.2)   | 384 (13.1)   | 558 (21.2)   | 337 (13.1)   | 170 (18.4)  | 141 (14.3)  | 884 (19.7)   | 612 (13.3)   | 21 (12.9)              | 20 (12.5)   | 301 (16.1)              | 230 (13.3)   |
| Leading to discontinuation                                 | 414 (6.4)    | 351 (5.4)    | 128 (4.3)    | 124 (4.2)    | 212 (8.1)    | 153 (5.9)    | 74 (8.0)    | 74 (7.5)    | 313 (7.0)    | 249 (5.4)    | 9 (5.5)                | 7 (4.4)     | 92 (4.9)                | 95 (5.5)     |
| Any SAE                                                    | 2060 (31.6)  | 2186 (33.7)  | 856 (29.0)   | 938 (32.1)   | 871 (33.1)   | 876 (34.0)   | 333 (36.0)  | 372 (37.8)  | 1487 (33.2)  | 1590 (34.6)  | 33 (20.2)              | 42 (26.3)   | 540 (28.9)              | 554 (31.9)   |
| Related to study drug                                      | 83 (1.3)     | 61 (0.9)     | 29 (1.0)     | 27 (0.9)     | 39 (1.5)     | 17 (0.7)     | 15 (1.6)    | 17 (1.7)    | 56 (1.3)     | 46 (1.0)     | 0                      | 1 (0.6)     | 27 (1.4)                | 14 (0.8)     |
| Leading to discontinuation                                 | 145 (2.2)    | 154 (2.4)    | 41 (1.4)     | 48 (1.6)     | 75 (2.9)     | 71 (2.8)     | 29 (3.1)    | 35 (3.6)    | 115 (2.6)    | 112 (2.4)    | 1 (0.6)                | 2 (1.3)     | 29 (1.5)                | 40 (2.3)     |
| Any AE leading to death                                    | 110 (1.7)    | 151 (2.3)    | 43 (1.5)     | 55 (1.9)     | 42 (1.6)     | 62 (2.4)     | 25 (2.7)    | 34 (3.5)    | 73 (1.6)     | 115 (2.5)    | 0                      | 3 (1.9)     | 37 (2.0)                | 33 (1.9)     |
| <b>AEs of interest</b>                                     |              |              |              |              |              |              |             |             |              |              |                        |             |                         |              |
| Hypotension                                                | 282(4.3)     | 177 (2.7)    | 101 (3.4)    | 70 (2.4)     | 127 (4.8)    | 76 (2.9)     | 54 (5.8)    | 31 (3.1)    | 216 (4.8)    | 131 (2.9)    | 3 (1.8)                | 0           | 63 (3.4)                | 46 (2.7)     |
| Orthostatic hypotension                                    | 46 (0.7)     | 39 (0.6)     | 18 (0.6)     | 15 (0.5)     | 23 (0.9)     | 15 (0.6)     | 5 (0.5)     | 9 (0.9)     | 34 (0.8)     | 30 (0.7)     | 0                      | 2 (1.3)     | 12 (0.6)                | 7 (0.4)      |
| Hyperkalemia                                               | 912 (14.0)   | 448 (6.9)    | 360 (12.2)   | 238 (8.1)    | 420 (16.0)   | 158 (6.1)    | 132 (14.3)  | 52 (5.3)    | 647 (14.5)   | 304 (6.6)    | 14 (8.6)               | 16 (10.0)   | 251 (13.4)              | 128 (7.4)    |
| Leading to permanent discontinuation                       | 110 (1.7)    | 38 (0.6)     | 31 (1.0)     | 13 (0.4)     | 54 (2.1)     | 19 (0.7)     | 25 (2.7)    | 6 (0.6)     | 83 (1.9)     | 28 (0.6)     | 4 (2.5)                | 1 (0.6)     | 23 (1.2)                | 9 (0.5)      |
| Classified as a serious AE                                 | 69 (1.1)     | 16 (0.2)     | 28 (0.9)     | 8 (0.3)      | 29 (1.1)     | 5 (0.2)      | 12 (1.3)    | 3 (0.3)     | 45 (1.0)     | 9 (0.2)      | 1 (0.6)                | 0           | 23 (1.2)                | 7 (0.4)      |
| Leading to hospitalization                                 | 61 (0.9)     | 10 (0.2)     | 26 (0.9)     | 6 (0.2)      | 25 (1.0)     | 2 (<0.1)     | 10 (1.1)    | 2 (0.2)     | 38 (0.8)     | 5 (0.1)      | 1 (0.6)                | 0           | 22 (1.2)                | 5 (0.3)      |
| Gynecomastia                                               | 8 (0.1)      | 11 (0.2)     | 2 (<0.1)     | 4 (0.1)      | 5 (0.2)      | 3 (0.1)      | 1 (0.1)     | 4 (0.4)     | 8 (0.2)      | 11 (0.2)     | NA                     | NA          | NA                      | NA           |
| <b>Central laboratory assessments, n/N (%)<sup>a</sup></b> |              |              |              |              |              |              |             |             |              |              |                        |             |                         |              |

6

|                             |                  |                |                 |                |                 |                |                |              |                 |                |               |             |                 |                |
|-----------------------------|------------------|----------------|-----------------|----------------|-----------------|----------------|----------------|--------------|-----------------|----------------|---------------|-------------|-----------------|----------------|
| Serum potassium >5.5 mmol/L | 1075/6402 (16.8) | 470/6370 (7.4) | 444/2904 (15.3) | 233/2871 (8.1) | 460/2585 (17.8) | 180/2529 (7.1) | 171/913 (18.7) | 57/970 (5.9) | 720/4403 (16.4) | 308/4523 (6.8) | 16/159 (10.1) | 8/154 (5.2) | 339/1840 (18.4) | 154/1693 (9.1) |
| Serum potassium >6.0 mmol/L | 211/6439 (3.3)   | 80/6413 (1.2)  | 90/2926 (3.1)   | 44/2896 (1.5)  | 89/2598 (3.4)   | 31/2544 (1.2)  | 32/915 (3.5)   | 5/973 (0.5)  | 143/4428 (3.2)  | 48/4544 (1.1)  | 4/160 (2.5)   | 1/156 (0.6) | 64/1851 (3.5)   | 31/1713 (1.8)  |

AE = adverse event; FIN = finerenone; NA = not applicable; PBO = placebo; SAE = serious adverse event.

<sup>a</sup> The “*n*” numerator represents the number of patients at risk with  $\geq 1$  treatment-emergent laboratory assessment meeting the criterion. The “*N*” denominator represents all patients at risk for a treatment-emergent laboratory abnormality. Patients had both a baseline and postbaseline treatment-emergent value while the baseline value did not exceed the displayed threshold.

**eFigure 1.** Analysis of CV composite outcome and subcomponents according to (A) age and (B) sex.

**A.**

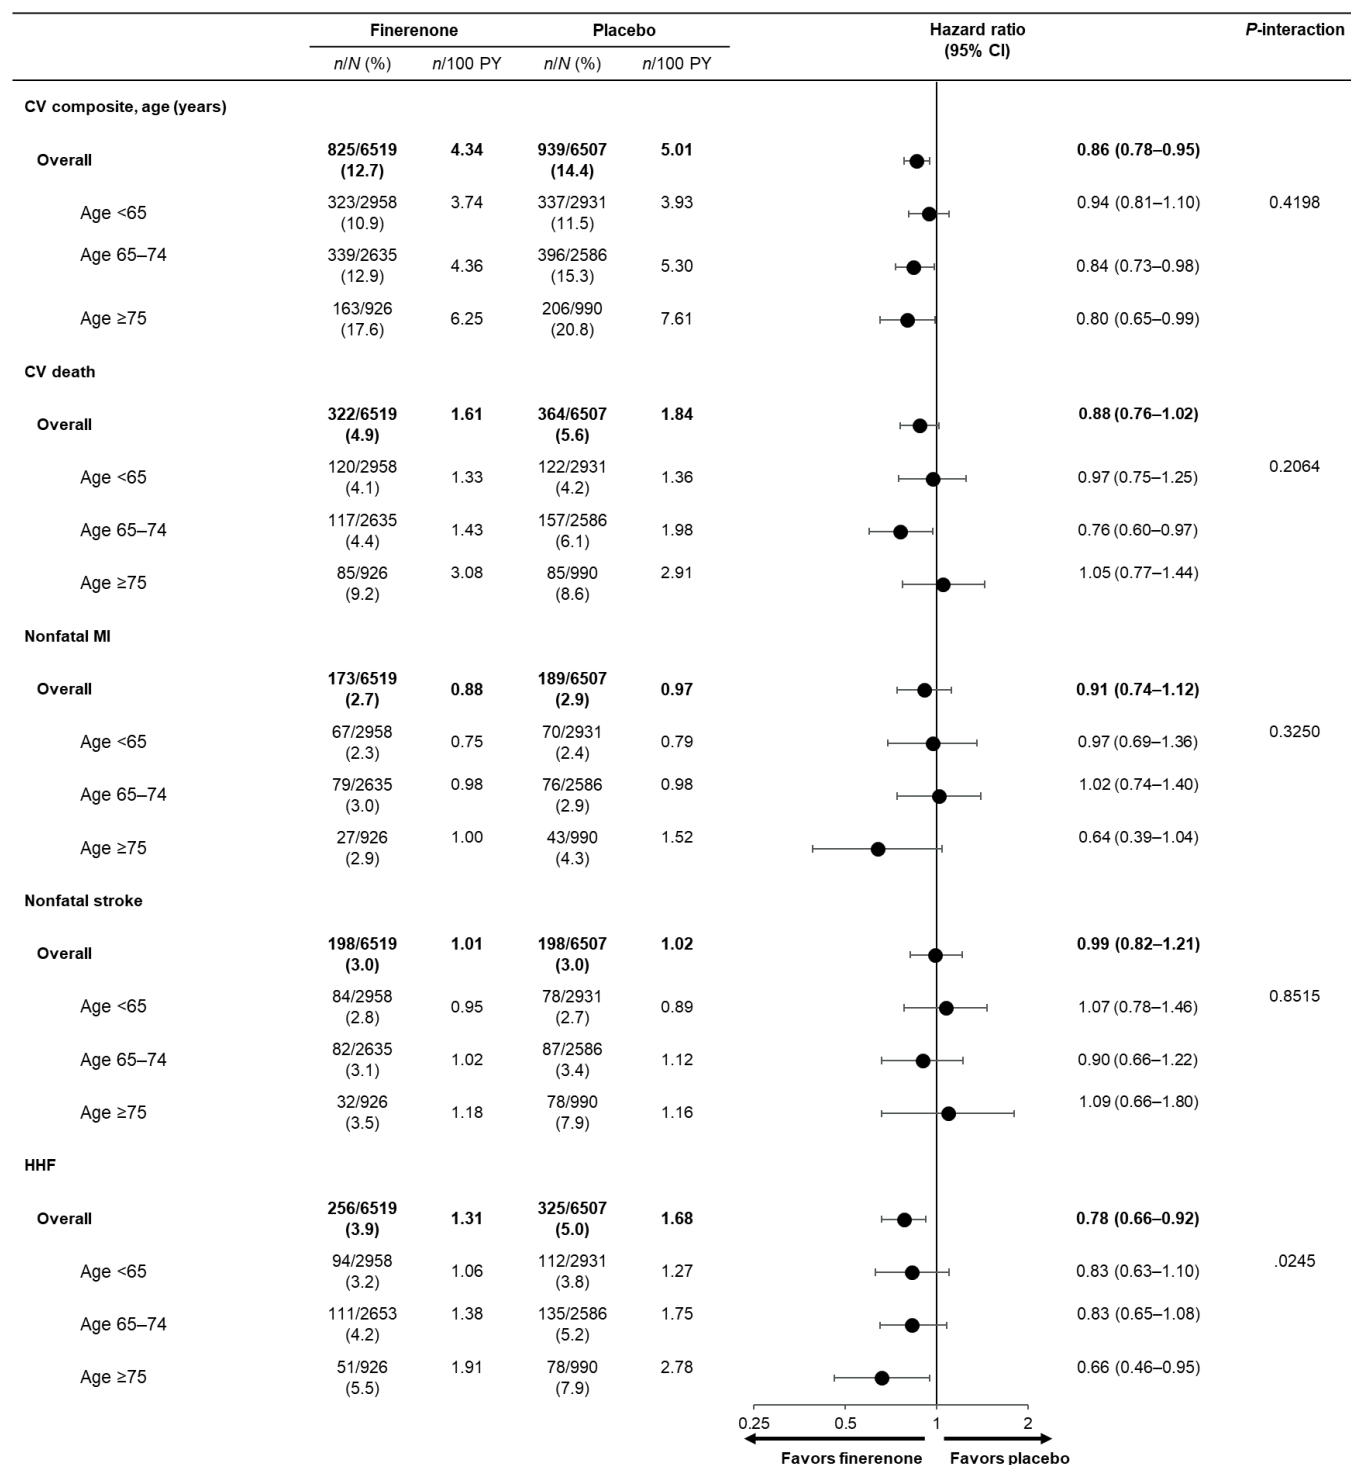

**B.**



1  
2  
3 A stratified Cox proportional hazards model including treatment was calculated separately by  
4 subgroup category. The  $P_{\text{interaction}}$  is based on a stratified Cox proportional hazards model including  
5 treatment, subgroup, and treatment by subgroup interaction.  
6  
7

8 CV composite outcome includes CV death, nonfatal MI, nonfatal stroke, or HHF.

9  
10 CI = confidence interval; CV = cardiovascular; HHF = hospitalization for heart failure; MI = myocardial  
11 infarction; PY = patient-years.  
12  
13  
14  
15

16 <sup>a</sup> An unstratified model using Firth's penalized likelihood approach was applied due to zero cell counts  
17 and/or convergence issues.  
18  
19  
20  
21  
22  
23  
24  
25  
26  
27  
28  
29  
30  
31  
32  
33  
34  
35  
36  
37  
38  
39  
40  
41  
42  
43  
44  
45  
46  
47  
48  
49  
50  
51  
52  
53  
54  
55  
56  
57  
58  
59  
60

**eFigure 2.** Hazard ratio (finerenone vs placebo) as a function of age modeled with cubic splines for CV composite outcome by age (A), spline for hazard ratio of CV composite outcomes by sex (B, C), and age distribution by sex (D).



CV = cardiovascular.

11



**eFigure 3.** Hazard ratio (finerenone vs placebo) as a function of age modeled with cubic splines for kidney composite outcome by age (A), spline for hazard ratio of kidney composite outcomes by sex (B, C), and age distribution by sex (D).

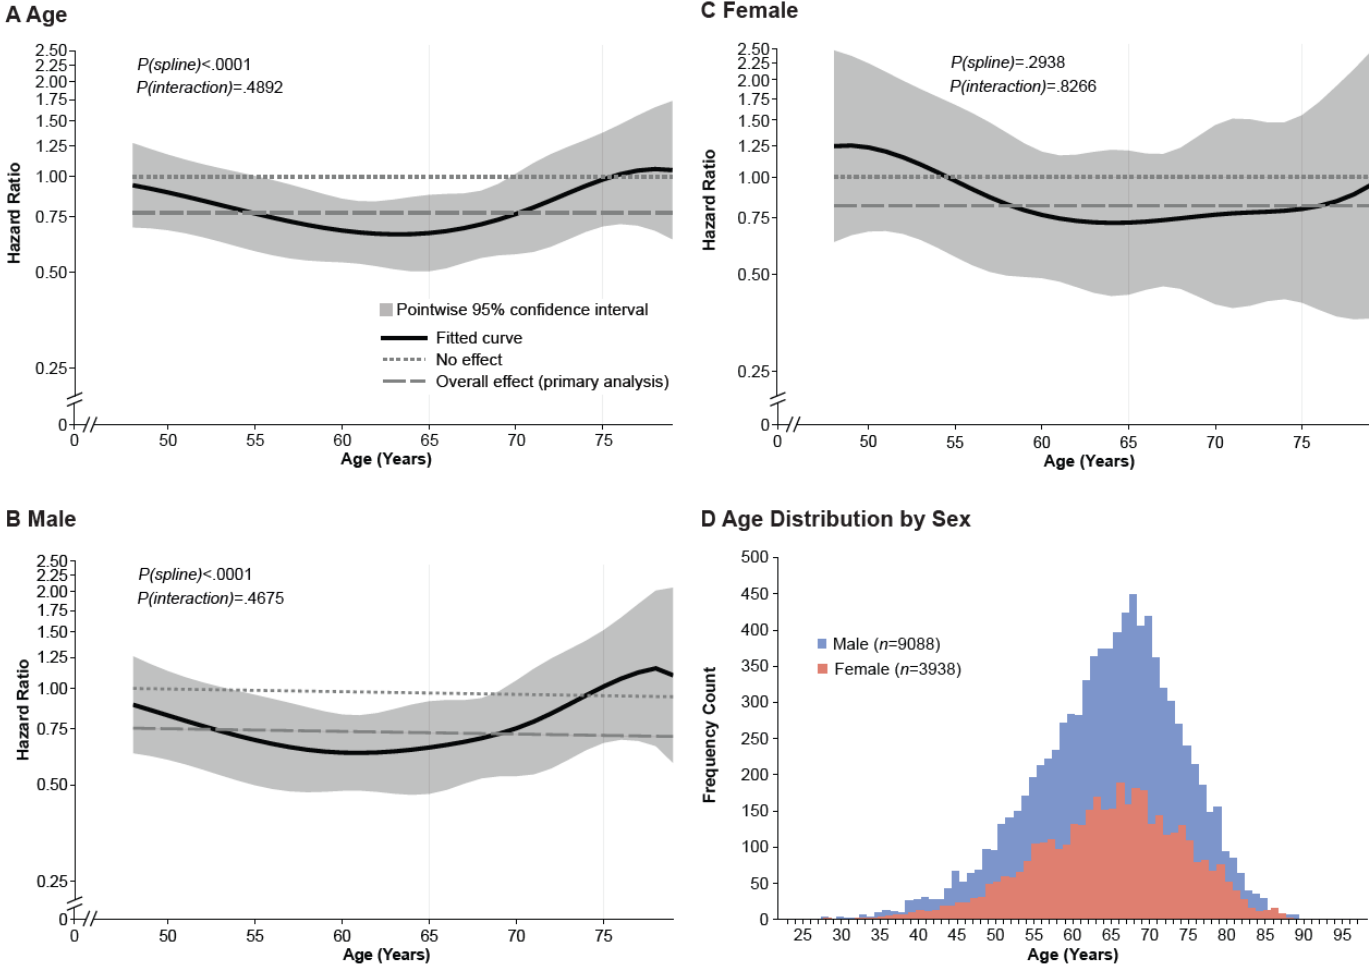

**eFigure 4.** LS mean change in eGFR from baseline, chronic, and total slopes over time by sex.

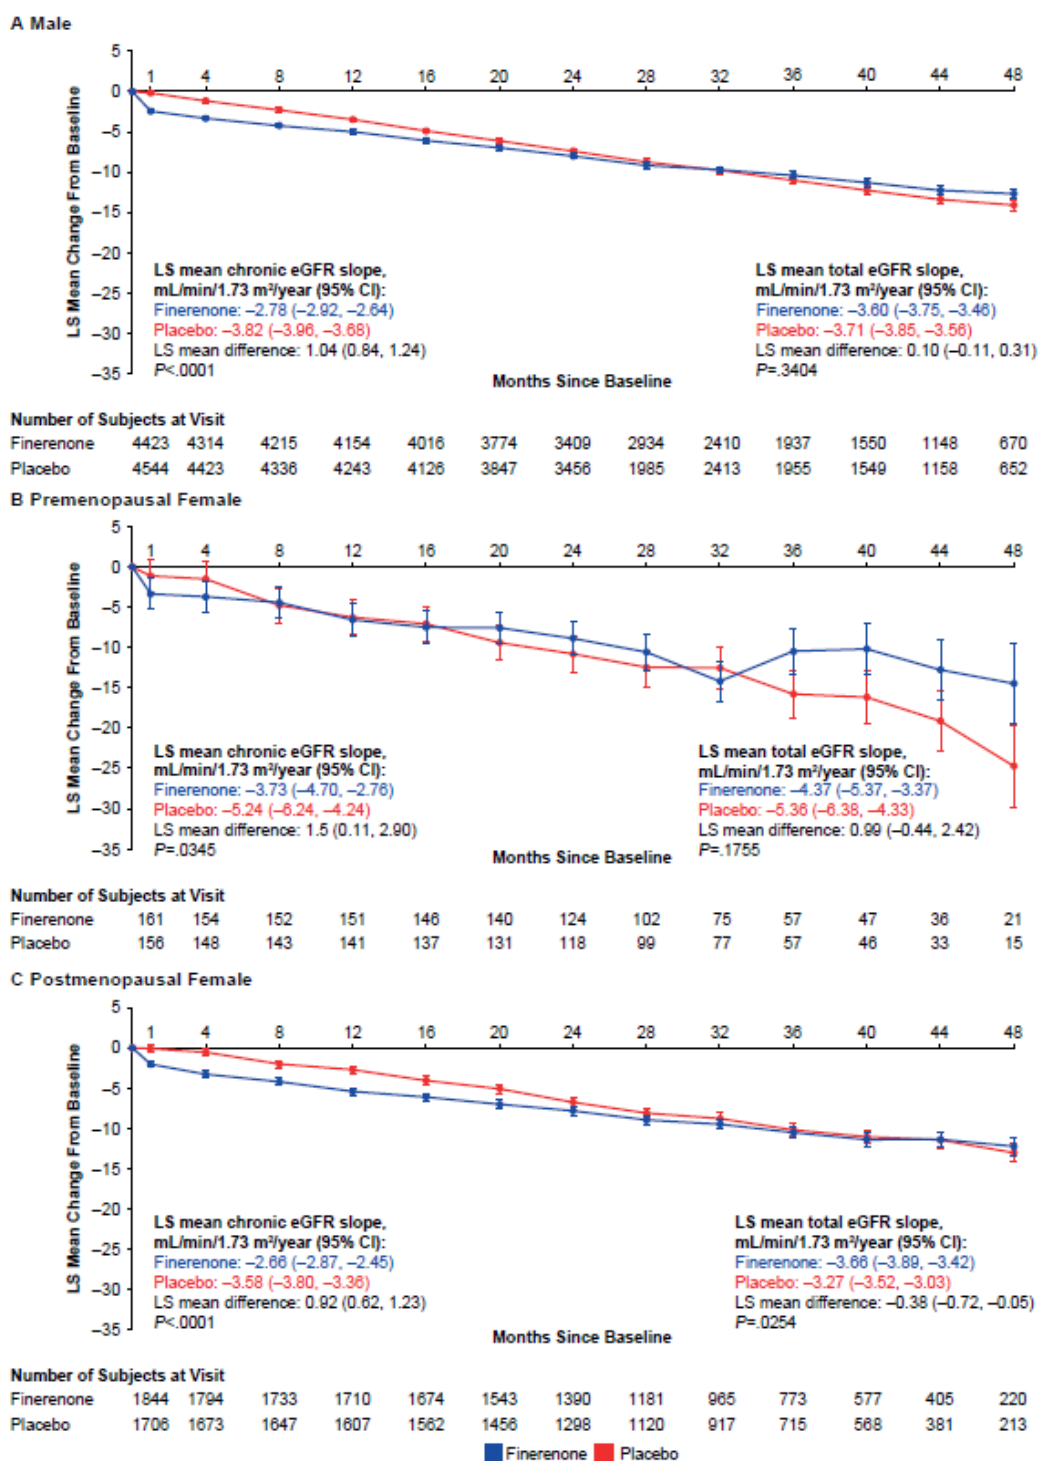

Chronic eGFR slope from month 4 to end-of-study visit.

CI = confidence interval; eGFR = estimated glomerular filtration rate; LS = least-squares.

**eFigure 5.** LS mean ratio to baseline UACR over time by age and sex

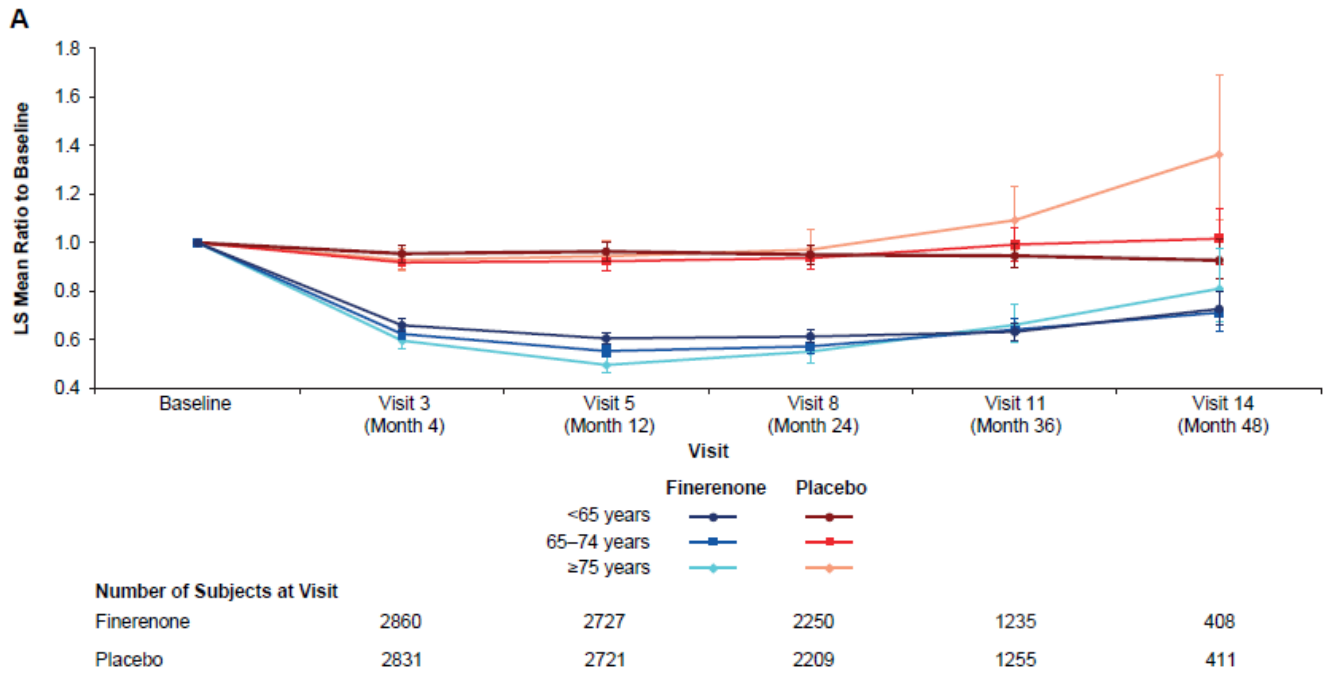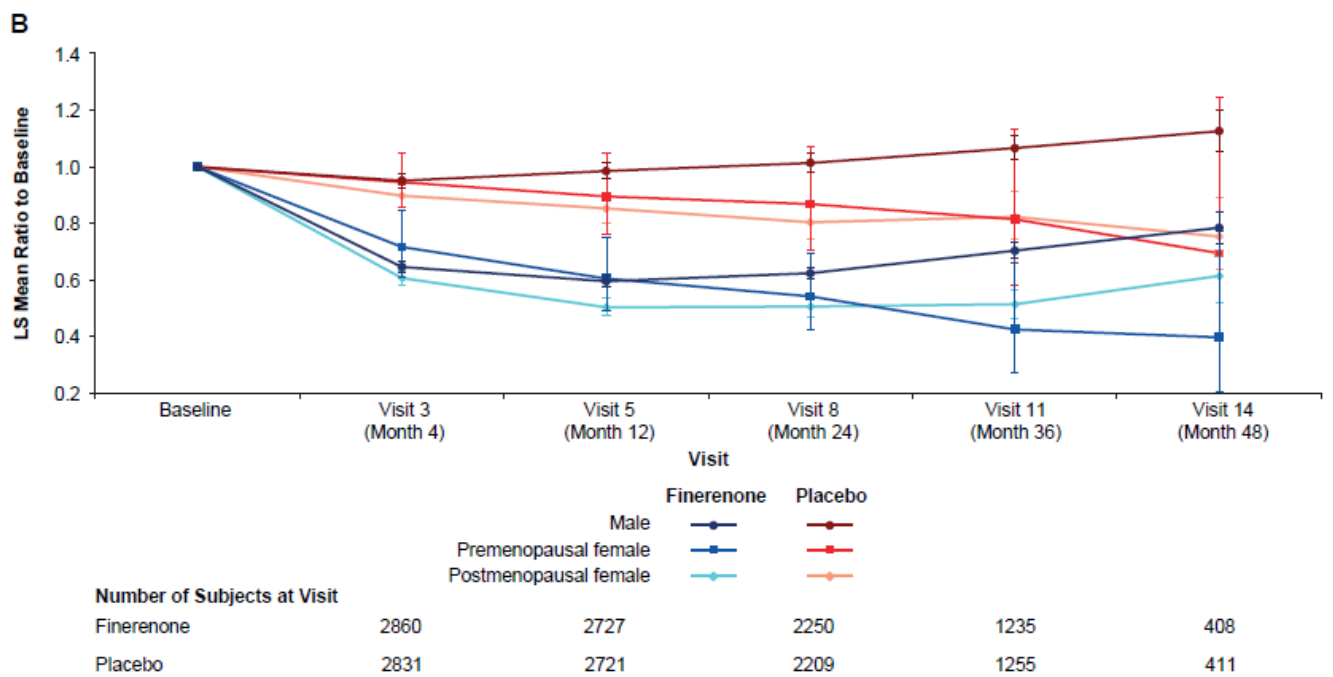

LS = least-squares; UACR = urine albumin-to-creatinine ratio.

**eFigure 6.** Relative risk of treatment-emergent hyperkalemia causing permanent discontinuation of study drug by age and sex



Relative risk values based on Mantel-Haenszel estimates (stratified by study). For the relative risk, a treatment-arm-size zero cell correction with zero term = 0.5 was applied.

**eFigure 7.** FIDELITY CONSORT diagram.

<sup>a</sup> The patient was considered as having completed the study if there was a contact with the patient after the end-of-study notification or if the patient died.

CONSORT = Consolidated Standards of Reporting Trials; COVID-19, coronavirus disease of 2019;

FAS, full analysis set; FIDELITY = The Finerenone in chronic kidney disease and type 2 diabetes:

Combined FIDELIO-DKD and FIGARO-DKD Trial programme analysis; GCP, Good Clinical Practice.
