# Supplementary material for: Finerenone cardiovascular and kidney outcomes by age and sex: FIDELITY post hoc analysis of two phase 3, multicentre, double-blind trials
Source: PubMed Central journal article supplement — BMJ Open. 2024 Mar 19;14(3):e076444. doi: 10.1136/bmjopen-2023-076444 (PMC10952937; doi:10.1136/bmjopen-2023-076444), 2024-03-19
Supplement: bmjopen-2023-076444supp001.pdf [file bmjopen-2023-076444supp001.pdf]

## Finerenone Cardiovascular and Kidney Outcomes by Age and Sex: FIDELITY Post Hoc Analysis of Two Phase 3, Multicenter, Double-Blind Trials

### Contents

|                                                                                                                                                                                                                                                            |    |
|------------------------------------------------------------------------------------------------------------------------------------------------------------------------------------------------------------------------------------------------------------|----|
| Finerenone Cardiovascular and Kidney Outcomes by Age and Sex: FIDELITY Post Hoc Analysis of Two Phase 3, Multicenter, Double-Blind Trials .....                                                                                                            | 1  |
| Supplementary Tables and Figures .....                                                                                                                                                                                                                     | 2  |
| <b>eTable 1.</b> Patient Baseline Characteristics According to Age and Sex Stratified by Treatment Group .....                                                                                                                                             | 2  |
| <b>eTable 2.</b> Treatment-Emergent AEs According to Age and Sex .....                                                                                                                                                                                     | 6  |
| <b>eFigure 1.</b> Analysis of CV composite outcome and subcomponents according to (A) age and (B) sex .....                                                                                                                                                | 8  |
| <b>eFigure 2.</b> Hazard ratio (finerenone vs placebo) as a function of age modeled with cubic splines for CV composite outcome by age (A), spline for hazard ratio of CV composite outcomes by sex (B, C), and age distribution by sex (D). .....         | 11 |
| <b>eFigure 3.</b> Hazard ratio (finerenone vs placebo) as a function of age modeled with cubic splines for kidney composite outcome by age (A), spline for hazard ratio of kidney composite outcomes by sex (B, C), and age distribution by sex (D). ..... | 12 |
| <b>eFigure 4.</b> LS mean change in eGFR from baseline, chronic, and total slopes over time by sex .....                                                                                                                                                   | 13 |
| <b>eFigure 5.</b> LS mean ratio to baseline UACR over time by age and sex .....                                                                                                                                                                            | 14 |
| <b>eFigure 6.</b> Relative risk of treatment-emergent hyperkalemia causing permanent discontinuation of study drug by age and sex .....                                                                                                                    | 15 |
| <b>eFigure 7.</b> FIDELITY CONSORT diagram. ....                                                                                                                                                                                                           | 16 |

## Supplementary Tables and Figures

eTable 1. Patient Baseline Characteristics According to Age and Sex Stratified by Treatment Group

| n (%)                                     | All          |              | Age          |              |              |              |              |              | Sex          |              |                        |              |                         |              |
|-------------------------------------------|--------------|--------------|--------------|--------------|--------------|--------------|--------------|--------------|--------------|--------------|------------------------|--------------|-------------------------|--------------|
|                                           |              |              | <65 Years    |              | 65–74 Years  |              | ≥75 Years    |              | Male         |              | Female (Premenopausal) |              | Female (Postmenopausal) |              |
|                                           | FIN (n=6519) | PBO (n=6507) | FIN (n=2958) | PBO (n=2931) | FIN (n=2635) | PBO (n=2586) | FIN (n=926)  | PBO (n=990)  | FIN (n=4481) | PBO (n=4607) | FIN (n=163)            | PBO (n=160)  | FIN (n=1875)            | PBO (n=1740) |
| Age, y, mean ± SD                         | 64.7 ± 9.4   | 64.8 ± 9.7   | 56.5 ± 6.4   | 56.3 ± 6.7   | 69.1 ± 2.7   | 69.2 ± 2.8   | 78.4 ± 3.0   | 78.4 ± 3.1   | 64.8 ± 9.3   | 64.9 ± 9.6   | 45.3 ± 4.4             | 44.9 ± 5.4   | 66.2 ± 8.0              | 66.4 ± 8.0   |
| Sex, n (%)                                |              |              |              |              |              |              |              |              |              |              |                        |              |                         |              |
| Female                                    | 2038 (31.3)  | 1900 (29.2)  | 959 (32.4)   | 880 (30.0)   | 772 (29.3)   | 729 (28.2)   | 307 (33.2)   | 291 (29.4)   | 0 (0.0)      | 0 (0.0)      | 163 (100)              | 160 (100)    | 1875 (100)              | 1740 (100)   |
| Male                                      | 4481 (68.7)  | 4607 (70.8)  | 1999 (67.6)  | 2051 (70.0)  | 1863 (70.7)  | 1857 (71.8)  | 619 (66.8)   | 699 (70.6)   | 4481 (100)   | 4607 (100)   | 0 (0.0)                | 0 (0.0)      | 0 (0.0)                 | 0 (0.0)      |
| Race, n (%)                               |              |              |              |              |              |              |              |              |              |              |                        |              |                         |              |
| Asian                                     | 1432 (22.0)  | 1462 (22.5)  | 772 (26.1)   | 819 (27.9)   | 518 (19.7)   | 479 (18.5)   | 142 (15.3)   | 164 (16.6)   | 1032 (23.0)  | 1104 (24.0)  | 45 (27.6)              | 42 (26.3)    | 355 (18.9)              | 316 (18.2)   |
| Black/African American                    | 253 (3.9)    | 269 (4.1)    | 158 (5.3)    | 151 (5.2)    | 75 (2.8)     | 85 (3.3)     | 20 (2.2)     | 33 (3.3)     | 137 (3.1)    | 147 (3.2)    | 17 (10.4)              | 20 (12.5)    | 99 (5.3)                | 102 (5.9)    |
| White                                     | 4449 (68.2)  | 4420 (67.9)  | 1827 (61.8)  | 1765 (60.2)  | 1908 (72.4)  | 1909 (73.8)  | 714 (77.1)   | 746 (75.4)   | 3099 (69.2)  | 3132 (68.0)  | 84 (51.5)              | 83 (51.9)    | 1266 (67.5)             | 1205 (69.3)  |
| Other <sup>a</sup>                        | 385 (5.9)    | 356 (5.5)    | 201 (6.8)    | 196 (6.7)    | 134 (5.1)    | 113 (4.4)    | 50 (5.4)     | 47 (4.7)     | 213 (4.8)    | 224 (4.9)    | 17 (10.4)              | 15 (9.4)     | 155 (8.3)               | 117 (6.7)    |
| Systolic blood pressure, mm Hg, mean (SD) | 136.8 ± 14.2 | 136.7 ± 14.3 | 135.7 ± 13.9 | 135.5 ± 14.1 | 137.4 ± 14.2 | 137.5 ± 14.2 | 138.4 ± 14.6 | 138.5 ± 14.6 | 136.9 ± 14.1 | 136.7 ± 14.3 | 131.6 ± 13.1           | 134.4 ± 14.7 | 136.8 ± 14.4            | 136.9 ± 14.0 |
| Diastolic blood pressure,                 | 76.3 ± 9.6   | 76.4 ± 9.6   | 78.7 ± 9.2   | 79.0 ± 8.9   | 74.8 ± 9.4   | 74.9 ± 9.4   | 73.2 ± 9.8   | 72.4 ± 9.8   | 76.6 ± 9.7   | 76.5 ± 9.7   | 78.7 ± 8.2             | 81.6 ± 8.4   | 75.6 ± 9.6              | 75.6 ± 9.4   |

| n (%)                                                 | All                  |                      | Age                  |                      |                      |                      |                      |                     | Sex                  |                      |                        |                      |                         |                      |
|-------------------------------------------------------|----------------------|----------------------|----------------------|----------------------|----------------------|----------------------|----------------------|---------------------|----------------------|----------------------|------------------------|----------------------|-------------------------|----------------------|
|                                                       |                      |                      | <65 Years            |                      | 65–74 Years          |                      | ≥75 Years            |                     | Male                 |                      | Female (Premenopausal) |                      | Female (Postmenopausal) |                      |
|                                                       | FIN (n=6519)         | PBO (n=6507)         | FIN (n=2958)         | PBO (n=2931)         | FIN (n=2635)         | PBO (n=2586)         | FIN (n=926)          | PBO (n=990)         | FIN (n=4481)         | PBO (n=4607)         | FIN (n=163)            | PBO (n=160)          | FIN (n=1875)            | PBO (n=1740)         |
| mm Hg, mean (SD)                                      |                      |                      |                      |                      |                      |                      |                      |                     |                      |                      |                        |                      |                         |                      |
| Duration of diabetes, y, mean (SD)                    | 15.4 ± 8.7           | 15.4 ± 8.7           | 13.6 ± 7.6           | 13.3 ± 7.7           | 16.4 ± 8.7           | 16.5 ± 8.5           | 18.7 ± 10.7          | 18.5 ± 10.2         | 15.4 ± 8.6           | 15.3 ± 8.4           | 11.0 ± 7.4             | 10.1 ± 6.5           | 15.9 ± 9.0              | 16.0 ± 9.2           |
| HbA1c, %, mean (SD)                                   | 7.7 ± 1.4            | 7.7 ± 1.4            | 7.9 ± 1.5            | 7.9 ± 1.5            | 7.6 ± 1.3            | 7.6 ± 1.3            | 7.5 ± 1.2            | 7.4 ± 1.2           | 7.6 ± 1.3            | 7.6 ± 1.3            | 8.1 ± 1.7              | 8.3 ± 1.6            | 7.9 ± 1.4               | 7.9 ± 1.5            |
| Serum potassium, mmol/L, mean (SD)                    | 4.4 ± 0.4            | 4.4 ± 0.4            | 4.3 ± 0.4            | 4.4 ± 0.5            | 4.4 ± 0.4            | 4.4 ± 0.4            | 4.4 ± 0.4            | 4.4 ± 0.4           | 4.3 ± 0.4            | 4.3 ± 0.5            | 4.3 ± 0.4              | 4.4 ± 0.4            | 4.4 ± 0.4               | 4.4 ± 0.4            |
| eGFR, mL/min/1.73 m <sup>2</sup> , mean (SD)          | 57.5 ± 21.6          | 57.7 ± 21.8          | 63.9 ± 23.9          | 64.6 ± 24.0          | 53.7 ± 18.4          | 53.3 ± 18.6          | 48.0 ± 15.5          | 48.3 ± 14.8         | 57.8 ± 21.0          | 57.7 ± 21.4          | 76.3 ± 28.7            | 77.5 ± 29.1          | 55.3 ± 21.5             | 55.8 ± 21.1          |
| eGFR, mL/min/1.73 m <sup>2</sup> , n (%) <sup>b</sup> |                      |                      |                      |                      |                      |                      |                      |                     |                      |                      |                        |                      |                         |                      |
| <25                                                   | 81 (1.2)             | 81 (1.2)             | 24 (0.8)             | 29 (1.0)             | 35 (1.3)             | 37 (1.4)             | 22 (2.4)             | 15 (1.5)            | 44 (1.0)             | 54 (1.2)             | 0                      | 2 (1.3)              | 37 (2.0)                | 25 (1.4)             |
| 25–<45                                                | 2117 (32.5)          | 2115 (32.5)          | 744 (25.2)           | 704 (24.0)           | 937 (35.6)           | 961 (37.2)           | 436 (47.1)           | 450 (45.5)          | 1392 (31.1)          | 1479 (32.1)          | 31 (19.0)              | 26 (16.3)            | 694 (37.0)              | 610 (35.1)           |
| 45–<60                                                | 1717 (26.3)          | 1717 (26.4)          | 666 (22.5)           | 649 (22.1)           | 775 (29.4)           | 739 (28.6)           | 276 (29.8)           | 329 (33.2)          | 1240 (27.7)          | 1228 (26.7)          | 26 (16.0)              | 24 (15.0)            | 451 (24.1)              | 465 (26.7)           |
| ≥60                                                   | 2603 (39.9)          | 2592 (39.8)          | 1523 (51.5)          | 1548 (52.8)          | 888 (33.7)           | 848 (32.8)           | 192 (20.7)           | 196 (19.8)          | 1805 (40.3)          | 1846 (40.1)          | 106 (65.0)             | 108 (67.5)           | 692 (36.9)              | 638 (36.7)           |
| UACR, mg/g, median (Q1–Q3)                            | 514.2 (197.5–1129.4) | 514.9 (198.2–1163.4) | 649.2 (308.0–1331.8) | 651.4 (322.5–1382.2) | 433.8 (150.7–1025.7) | 441.3 (157.8–1032.8) | 325.6 (107.00–802.7) | 340.5 (109.8–871.7) | 514.5 (205.3–1116.5) | 509.2 (195.4–1143.0) | 733.0 (336.3–1522.7)   | 868.4 (398.5–1604.2) | 496.4 (169.9–1124.4)    | 509.1 (185.0–1174.5) |
| UACR, mg/g, n (%) <sup>c</sup>                        |                      |                      |                      |                      |                      |                      |                      |                     |                      |                      |                        |                      |                         |                      |
| <30                                                   | 120 (1.8)            | 110 (1.7)            | 39 (1.3)             | 40 (1.4)             | 53 (2.0)             | 50 (1.9)             | 28 (3.0)             | 20 (2.0)            | 69 (1.5)             | 68 (1.5)             | 2 (1.2)                | 1 (0.6)              | 49 (2.6)                | 41 (2.4)             |
| 30–<300                                               | 2076 (31.8)          | 2023 (31.1)          | 686 (23.2)           | 645 (22.0)           | 971 (36.9)           | 936 (36.2)           | 419 (45.2)           | 442 (44.6)          | 1422 (31.7)          | 1459 (31.7)          | 34 (20.9)              | 20 (12.5)            | 620 (33.1)              | 544 (31.3)           |

| n (%)                                         | All          |              | Age          |              |              |              |             |             | Sex          |              |                        |             |                         |              |
|-----------------------------------------------|--------------|--------------|--------------|--------------|--------------|--------------|-------------|-------------|--------------|--------------|------------------------|-------------|-------------------------|--------------|
|                                               |              |              | <65 Years    |              | 65–74 Years  |              | ≥75 Years   |             | Male         |              | Female (Premenopausal) |             | Female (Postmenopausal) |              |
|                                               | FIN (n=6519) | PBO (n=6507) | FIN (n=2958) | PBO (n=2931) | FIN (n=2635) | PBO (n=2586) | FIN (n=926) | PBO (n=990) | FIN (n=4481) | PBO (n=4607) | FIN (n=163)            | PBO (n=160) | FIN (n=1875)            | PBO (n=1740) |
| ≥300                                          | 4321 (66.3)  | 4371 (67.2)  | 2231 (75.4)  | 2244 (76.6)  | 1611 (61.1)  | 1599 (61.8)  | 479 (51.7)  | 528 (53.3)  | 2989 (66.7)  | 3079 (66.8)  | 127 (77.9)             | 139 (86.9)  | 1205 (64.3)             | 1153 (66.3)  |
| BMI, kg/m <sup>2</sup> , mean (SD)            | 31.3 ± 6.0   | 31.3 ± 6.0   | 32.1 ± 6.5   | 32.0 ± 6.3   | 31.1 ± 5.7   | 31.1 ± 5.7   | 29.5 ± 4.8  | 29.6 ± 5.1  | 30.9 ± 5.6   | 30.9 ± 5.6   | 34.0 ± 7.9             | 34.3 ± 7.9  | 32.0 ± 6.7              | 32.1 ± 6.5   |
| Current smoker, n (%)                         | 1065 (16.3)  | 1028 (15.8)  | 657 (22.2)   | 626 (21.4)   | 351 (13.3)   | 335 (13.0)   | 57 (6.2)    | 67 (6.8)    | 874 (19.5)   | 856 (18.6)   | 17 (10.4)              | 18 (11.3)   | 174 (9.3)               | 154 (8.9)    |
| History of CV disease, present, n (%)         | 2979 (45.7)  | 2956 (45.4)  | 1127 (38.1)  | 1061 (36.2)  | 1330 (50.5)  | 1337 (51.7)  | 522 (56.4)  | 558 (56.4)  | 2152 (48.0)  | 2222 (48.2)  | 36 (22.1)              | 20 (12.5)   | 791 (42.2)              | 714 (41.0)   |
| History of heart failure                      | 485 (7.4)    | 522 (8.0)    | 211 (7.1)    | 202 (6.9)    | 192 (7.3)    | 240 (9.3)    | 82 (8.9)    | 80 (8.1)    | 302 (6.7)    | 328 (7.1)    | 11 (6.7)               | 11 (6.9)    | 172 (9.2)               | 183 (10.5)   |
| History of atrial fibrillation/atrial flutter | 568 (8.7)    | 538 (8.3)    | 144 (4.9)    | 122 (4.2)    | 280 (10.6)   | 267 (10.3)   | 144 (15.6)  | 149 (15.1)  | 439 (9.8)    | 428 (9.3)    | 0                      | 0           | 129 (6.9)               | 110 (6.3)    |
| Baseline medications, n (%) <sup>d</sup>      |              |              |              |              |              |              |             |             |              |              |                        |             |                         |              |
| RAS inhibitors (ACEis/ARBs)                   | 6508 (99.8)  | 6495 (99.8)  | 2951 (99.8)  | 2925 (99.8)  | 2631 (99.8)  | 2582 (99.8)  | 926 (100.0) | 988 (99.8)  | 4473 (99.8)  | 4596 (99.8)  | 163 (100.0)            | 160 (100.0) | 1872 (99.8)             | 1739 (>99.9) |
| Beta-blockers                                 | 3236 (49.6)  | 3268 (50.2)  | 1311 (44.3)  | 1308 (44.6)  | 1419 (53.9)  | 1430 (55.3)  | 506 (54.6)  | 530 (53.5)  | 2237 (49.9)  | 2308 (50.1)  | 57 (35.0)              | 54 (33.8)   | 942 (50.2)              | 906 (52.1)   |
| Diuretics                                     | 3325 (51.0)  | 3385 (52.0)  | 1378 (46.6)  | 1412 (48.2)  | 1412 (53.6)  | 1401 (54.2)  | 535 (57.8)  | 572 (57.8)  | 2320 (51.8)  | 2386 (51.8)  | 67 (41.1)              | 70 (43.8)   | 938 (50.0)              | 929 (53.4)   |
| Statins                                       | 4657 (71.4)  | 4742 (72.9)  | 1993 (67.4)  | 2040 (69.6)  | 1975 (75.0)  | 1945 (75.2)  | 689 (74.4)  | 757 (76.5)  | 3291 (73.4)  | 3405 (73.9)  | 93 (57.1)              | 110 (68.8)  | 1273 (67.9)             | 1227 (70.5)  |
| Calcium channel blockers                      | 3664 (56.2)  | 3694 (56.8)  | 1564 (52.9)  | 1563 (53.3)  | 1544 (58.6)  | 1508 (58.3)  | 556 (60.0)  | 623 (62.9)  | 2554 (57.0)  | 2654 (57.6)  | 74 (45.4%)             | 75 (46.9)   | 1036 (55.3)             | 965 (55.5)   |
| ≥1 glucose-lowering medication                | 6354 (97.5)  | 6366 (97.8)  | 2898 (98.0)  | 2881 (98.3)  | 2574 (97.7)  | 2537 (98.1)  | 882 (95.2)  | 948 (95.8)  | 4361 (97.3)  | 4499 (97.7)  | 161 (98.8)             | 156 (97.5)  | 1832 (97.7)             | 1711 (98.3)  |

| n (%)              | All          |              | Age          |              |              |              |             |             | Sex          |              |                        |             |                         |              |
|--------------------|--------------|--------------|--------------|--------------|--------------|--------------|-------------|-------------|--------------|--------------|------------------------|-------------|-------------------------|--------------|
|                    |              |              | <65 Years    |              | 65–74 Years  |              | ≥75 Years   |             | Male         |              | Female (Premenopausal) |             | Female (Postmenopausal) |              |
|                    | FIN (n=6519) | PBO (n=6507) | FIN (n=2958) | PBO (n=2931) | FIN (n=2635) | PBO (n=2586) | FIN (n=926) | PBO (n=990) | FIN (n=4481) | PBO (n=4607) | FIN (n=163)            | PBO (n=160) | FIN (n=1875)            | PBO (n=1740) |
| n (%) <sup>d</sup> |              |              |              |              |              |              |             |             |              |              |                        |             |                         |              |
| Insulin            | 3866 (59.3)  | 3764 (57.8)  | 1848 (62.5)  | 1789 (61.0)  | 1539 (58.4)  | 1481 (57.3)  | 479 (51.7)  | 494 (49.9)  | 2598 (58.0)  | 2605 (56.5)  | 94 (57.7)              | 99 (61.9)   | 1174 (62.6)             | 1060 (60.9)  |
| GLP-1RA            | 497 (7.6)    | 447 (6.9)    | 273 (9.2)    | 219 (7.5)    | 190 (7.2)    | 188 (7.3)    | 34 (3.7)    | 40 (4.0)    | 359 (8.0)    | 317 (6.9)    | 12 (7.4)               | 18 (11.3)   | 126 (6.7)               | 112 (6.4)    |
| SGLT-2i            | 438 (6.7)    | 439 (6.7)    | 251 (8.5)    | 266 (9.1)    | 149 (5.7)    | 140 (5.4)    | 38 (4.1)    | 33 (3.3)    | 331 (7.4)    | 340 (7.4)    | 19 (11.7)              | 17 (10.6)   | 88 (4.7)                | 82 (4.7)     |

ACEi = angiotensin-converting enzyme inhibitor; ARB = angiotensin receptor blocker; BMI = body mass index; CV = cardiovascular; eGFR = estimated

glomerular filtration rate; FIN = finerenone; GLP-1RA = glucagon-like peptide-1 receptor agonist; HbA1c = glycated hemoglobin; PBO = placebo; Q = quartile;

RAS = renin-angiotensin system; SD = standard deviation; SGLT-2i = sodium-glucose co-transporter-2 inhibitor; UACR = urine albumin-to-creatinine ratio.

Values are based on available data.

<sup>a</sup> Other: included American Indian/Alaska Native, Native Hawaiian/other Pacific, not reported, multiple.

<sup>b</sup> Missing (eGFR): <65 years, *n*=2; 65 to 74 years, *n*=1; postmenopausal female, *n*=3.

<sup>c</sup> Missing (UACR): <65 years, *n*=4; 65 to 74 years, *n*=1; male, *n*=2; postmenopausal female, *n*=3.

<sup>d</sup> Analysis allowed multiple drug groups for the same drug.

**eTable 2.** Treatment-Emergent AEs According to Age and Sex

| n (%)                                                      | ALL          |              | Age          |              |              |              |             |             | Sex          |              |                        |             |                         |              |
|------------------------------------------------------------|--------------|--------------|--------------|--------------|--------------|--------------|-------------|-------------|--------------|--------------|------------------------|-------------|-------------------------|--------------|
|                                                            |              |              | <65 Years    |              | 65–74 Years  |              | ≥75 Years   |             | Male         |              | Female (Premenopausal) |             | Female (Postmenopausal) |              |
|                                                            | FIN (n=6510) | PBO (n=6489) | FIN (n=2953) | PBO (n=2926) | FIN (n=2631) | PBO (n=2578) | FIN (n=926) | PBO (n=985) | FIN (n=4476) | PBO (n=4595) | FIN (n=163)            | PBO (n=160) | FIN (n=1871)            | PBO (n=1734) |
| Any AE                                                     | 5602 (86.1)  | 5607 (86.4)  | 2494 (84.5)  | 2523 (86.2)  | 2301 (87.5)  | 2225 (86.3)  | 807 (87.1)  | 859 (87.2)  | 3899 (87.1)  | 4011 (87.3)  | 137 (84.0)             | 138 (86.3)  | 1566 (83.7)             | 1458 (84.1)  |
| Related to study drug                                      | 1206 (18.5)  | 862 (13.3)   | 478 (16.2)   | 384 (13.1)   | 558 (21.2)   | 337 (13.1)   | 170 (18.4)  | 141 (14.3)  | 884 (19.7)   | 612 (13.3)   | 21 (12.9)              | 20 (12.5)   | 301 (16.1)              | 230 (13.3)   |
| Leading to discontinuation                                 | 414 (6.4)    | 351 (5.4)    | 128 (4.3)    | 124 (4.2)    | 212 (8.1)    | 153 (5.9)    | 74 (8.0)    | 74 (7.5)    | 313 (7.0)    | 249 (5.4)    | 9 (5.5)                | 7 (4.4)     | 92 (4.9)                | 95 (5.5)     |
| Any SAE                                                    | 2060 (31.6)  | 2186 (33.7)  | 856 (29.0)   | 938 (32.1)   | 871 (33.1)   | 876 (34.0)   | 333 (36.0)  | 372 (37.8)  | 1487 (33.2)  | 1590 (34.6)  | 33 (20.2)              | 42 (26.3)   | 540 (28.9)              | 554 (31.9)   |
| Related to study drug                                      | 83 (1.3)     | 61 (0.9)     | 29 (1.0)     | 27 (0.9)     | 39 (1.5)     | 17 (0.7)     | 15 (1.6)    | 17 (1.7)    | 56 (1.3)     | 46 (1.0)     | 0                      | 1 (0.6)     | 27 (1.4)                | 14 (0.8)     |
| Leading to discontinuation                                 | 145 (2.2)    | 154 (2.4)    | 41 (1.4)     | 48 (1.6)     | 75 (2.9)     | 71 (2.8)     | 29 (3.1)    | 35 (3.6)    | 115 (2.6)    | 112 (2.4)    | 1 (0.6)                | 2 (1.3)     | 29 (1.5)                | 40 (2.3)     |
| Any AE leading to death                                    | 110 (1.7)    | 151 (2.3)    | 43 (1.5)     | 55 (1.9)     | 42 (1.6)     | 62 (2.4)     | 25 (2.7)    | 34 (3.5)    | 73 (1.6)     | 115 (2.5)    | 0                      | 3 (1.9)     | 37 (2.0)                | 33 (1.9)     |
| <b>AEs of interest</b>                                     |              |              |              |              |              |              |             |             |              |              |                        |             |                         |              |
| Hypotension                                                | 282(4.3)     | 177 (2.7)    | 101 (3.4)    | 70 (2.4)     | 127 (4.8)    | 76 (2.9)     | 54 (5.8)    | 31 (3.1)    | 216 (4.8)    | 131 (2.9)    | 3 (1.8)                | 0           | 63 (3.4)                | 46 (2.7)     |
| Orthostatic hypotension                                    | 46 (0.7)     | 39 (0.6)     | 18 (0.6)     | 15 (0.5)     | 23 (0.9)     | 15 (0.6)     | 5 (0.5)     | 9 (0.9)     | 34 (0.8)     | 30 (0.7)     | 0                      | 2 (1.3)     | 12 (0.6)                | 7 (0.4)      |
| Hyperkalemia                                               | 912 (14.0)   | 448 (6.9)    | 360 (12.2)   | 238 (8.1)    | 420 (16.0)   | 158 (6.1)    | 132 (14.3)  | 52 (5.3)    | 647 (14.5)   | 304 (6.6)    | 14 (8.6)               | 16 (10.0)   | 251 (13.4)              | 128 (7.4)    |
| Leading to permanent discontinuation                       | 110 (1.7)    | 38 (0.6)     | 31 (1.0)     | 13 (0.4)     | 54 (2.1)     | 19 (0.7)     | 25 (2.7)    | 6 (0.6)     | 83 (1.9)     | 28 (0.6)     | 4 (2.5)                | 1 (0.6)     | 23 (1.2)                | 9 (0.5)      |
| Classified as a serious AE                                 | 69 (1.1)     | 16 (0.2)     | 28 (0.9)     | 8 (0.3)      | 29 (1.1)     | 5 (0.2)      | 12 (1.3)    | 3 (0.3)     | 45 (1.0)     | 9 (0.2)      | 1 (0.6)                | 0           | 23 (1.2)                | 7 (0.4)      |
| Leading to hospitalization                                 | 61 (0.9)     | 10 (0.2)     | 26 (0.9)     | 6 (0.2)      | 25 (1.0)     | 2 (<0.1)     | 10 (1.1)    | 2 (0.2)     | 38 (0.8)     | 5 (0.1)      | 1 (0.6)                | 0           | 22 (1.2)                | 5 (0.3)      |
| Gynecomastia                                               | 8 (0.1)      | 11 (0.2)     | 2 (<0.1)     | 4 (0.1)      | 5 (0.2)      | 3 (0.1)      | 1 (0.1)     | 4 (0.4)     | 8 (0.2)      | 11 (0.2)     | NA                     | NA          | NA                      | NA           |
| <b>Central laboratory assessments, n/N (%)<sup>a</sup></b> |              |              |              |              |              |              |             |             |              |              |                        |             |                         |              |

|                             |                  |                |                 |                |                 |                |                |              |                 |                |               |             |                 |                |
|-----------------------------|------------------|----------------|-----------------|----------------|-----------------|----------------|----------------|--------------|-----------------|----------------|---------------|-------------|-----------------|----------------|
| Serum potassium >5.5 mmol/L | 1075/6402 (16.8) | 470/6370 (7.4) | 444/2904 (15.3) | 233/2871 (8.1) | 460/2585 (17.8) | 180/2529 (7.1) | 171/913 (18.7) | 57/970 (5.9) | 720/4403 (16.4) | 308/4523 (6.8) | 16/159 (10.1) | 8/154 (5.2) | 339/1840 (18.4) | 154/1693 (9.1) |
| Serum potassium >6.0 mmol/L | 211/6439 (3.3)   | 80/6413 (1.2)  | 90/2926 (3.1)   | 44/2896 (1.5)  | 89/2598 (3.4)   | 31/2544 (1.2)  | 32/915 (3.5)   | 5/973 (0.5)  | 143/4428 (3.2)  | 48/4544 (1.1)  | 4/160 (2.5)   | 1/156 (0.6) | 64/1851 (3.5)   | 31/1713 (1.8)  |

AE = adverse event; FIN = finerenone; NA = not applicable; PBO = placebo; SAE = serious adverse event.

<sup>a</sup> The “*n*” numerator represents the number of patients at risk with  $\geq 1$  treatment-emergent laboratory assessment meeting the criterion. The “*N*” denominator represents all patients at risk for a treatment-emergent laboratory abnormality. Patients had both a baseline and postbaseline treatment-emergent value while the baseline value did not exceed the displayed threshold.

**eFigure 1.** Analysis of CV composite outcome and subcomponents according to (A) age and (B) sex.**A.**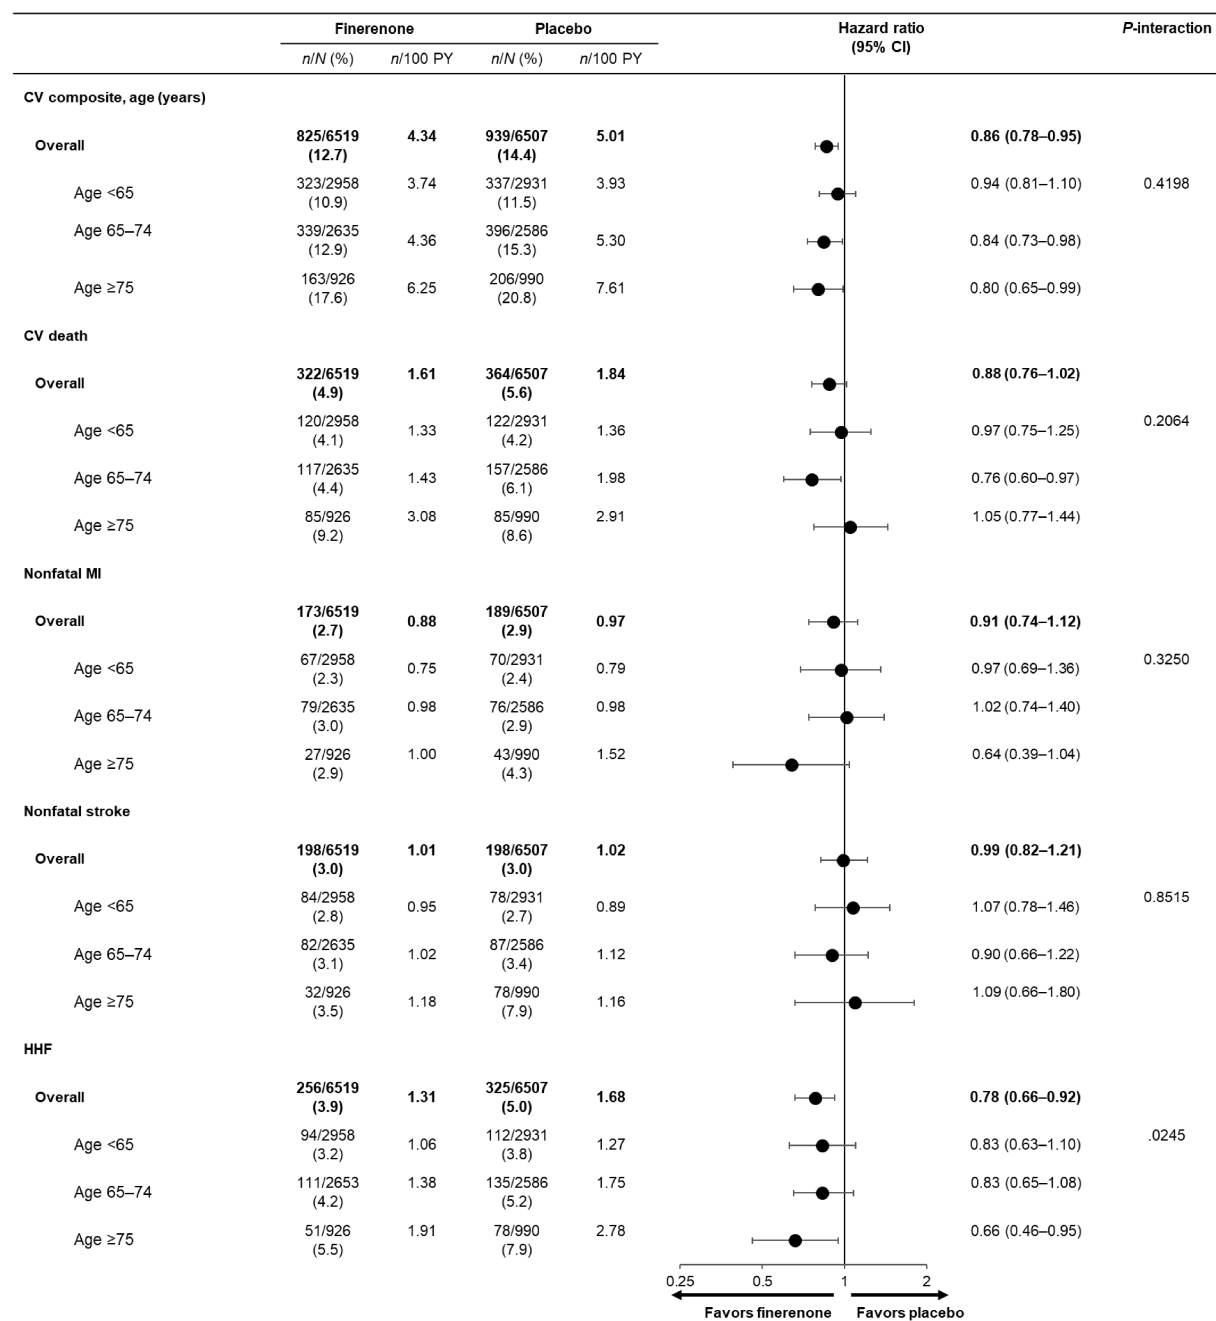



**B.**

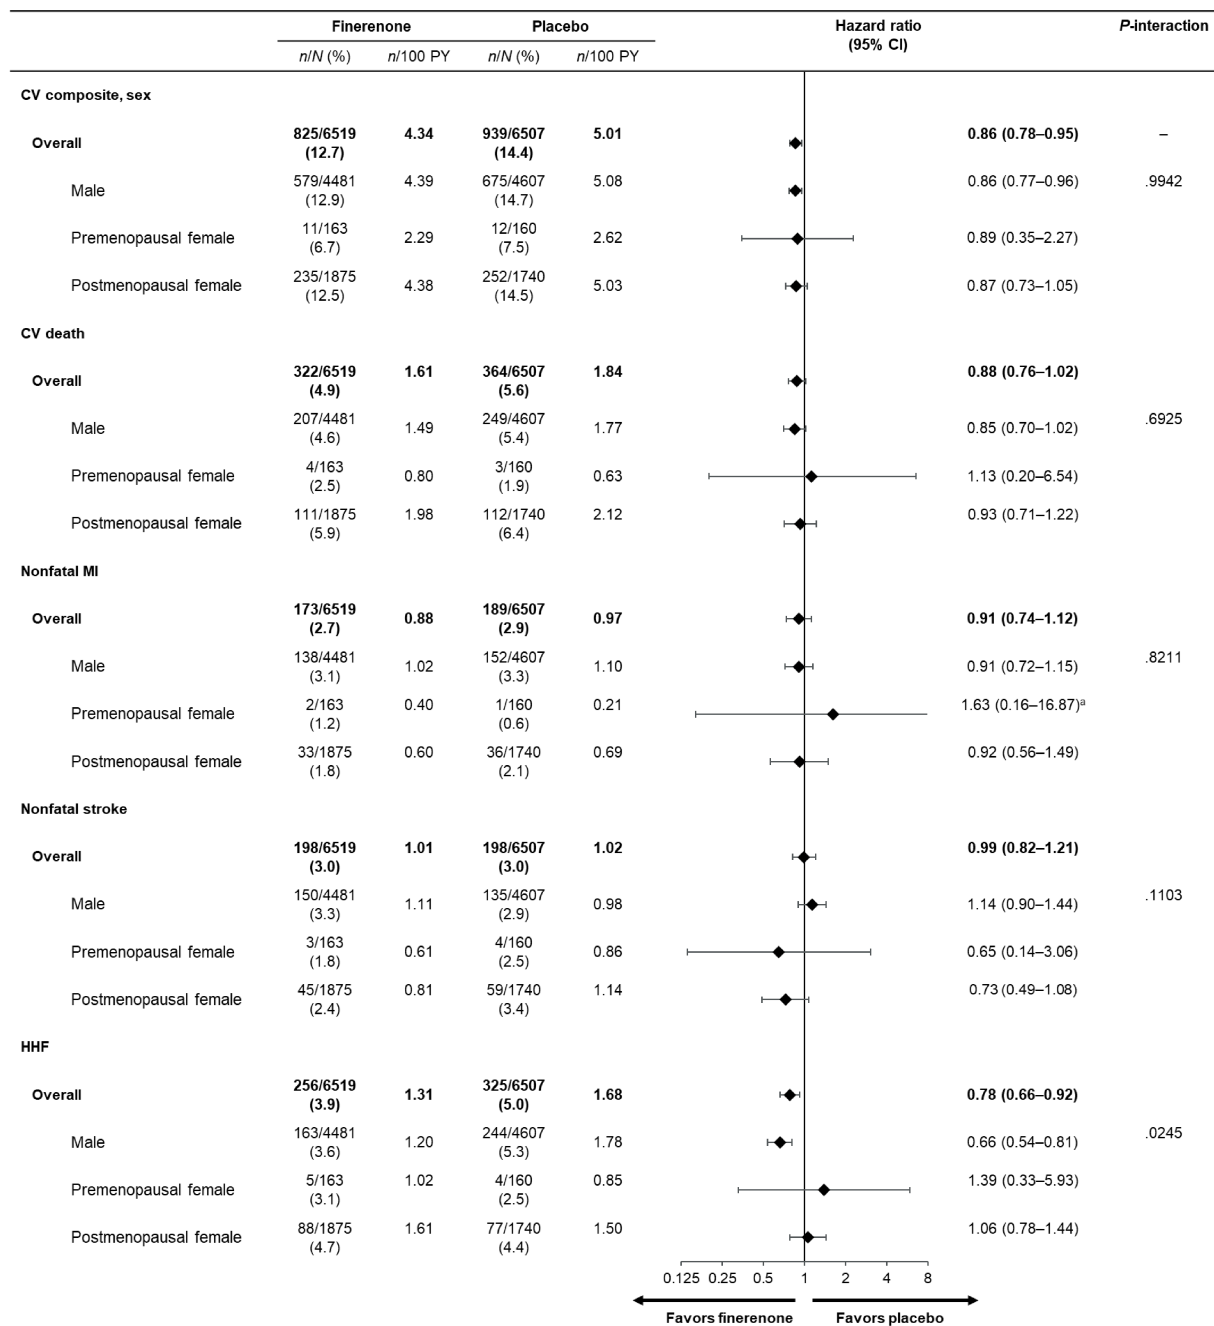

A stratified Cox proportional hazards model including treatment was calculated separately by subgroup category. The  $P_{\text{interaction}}$  is based on a stratified Cox proportional hazards model including treatment, subgroup, and treatment by subgroup interaction.

CV composite outcome includes CV death, nonfatal MI, nonfatal stroke, or HHF.

CI = confidence interval; CV = cardiovascular; HHF = hospitalization for heart failure; MI = myocardial infarction; PY = patient-years.

<sup>a</sup> An unstratified model using Firth's penalized likelihood approach was applied due to zero cell counts and/or convergence issues.

**eFigure 2.** Hazard ratio (finerenone vs placebo) as a function of age modeled with cubic splines for CV composite outcome by age (A), spline for hazard ratio of CV composite outcomes by sex (B, C), and age distribution by sex (D).

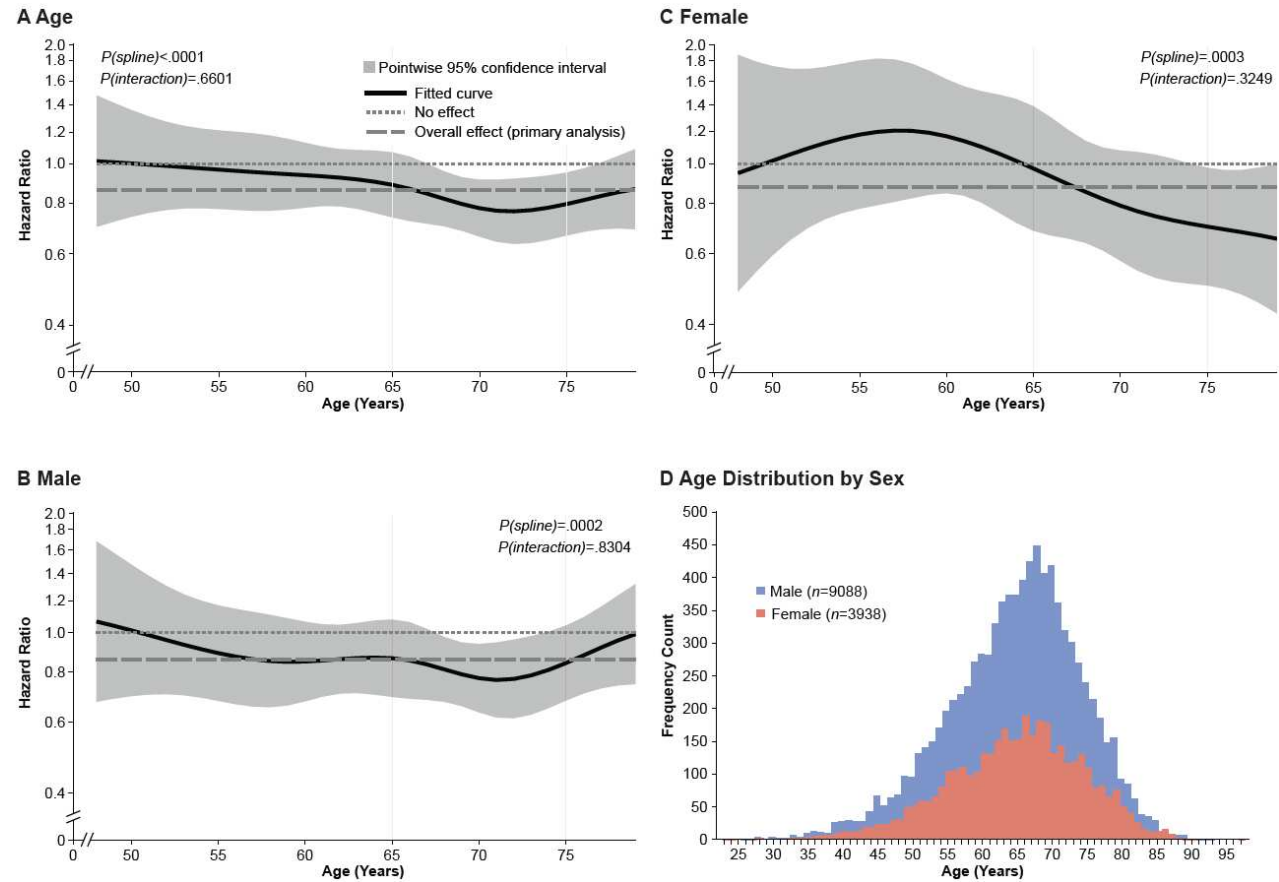

CV = cardiovascular.

**eFigure 3.** Hazard ratio (finerenone vs placebo) as a function of age modeled with cubic splines for kidney composite outcome by age (A), spline for hazard ratio of kidney composite outcomes by sex (B, C), and age distribution by sex (D).

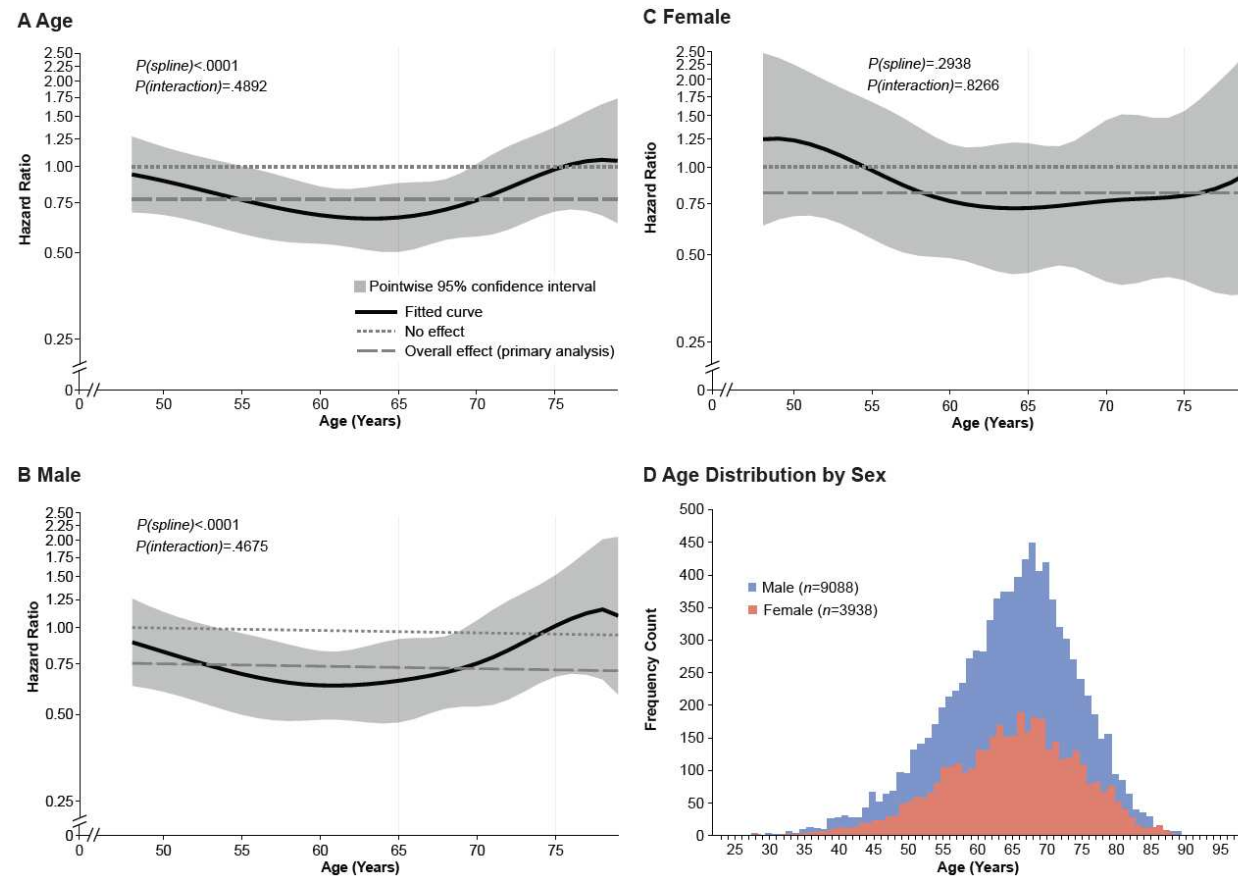

**eFigure 4.** LS mean change in eGFR from baseline, chronic, and total slopes over time by sex.

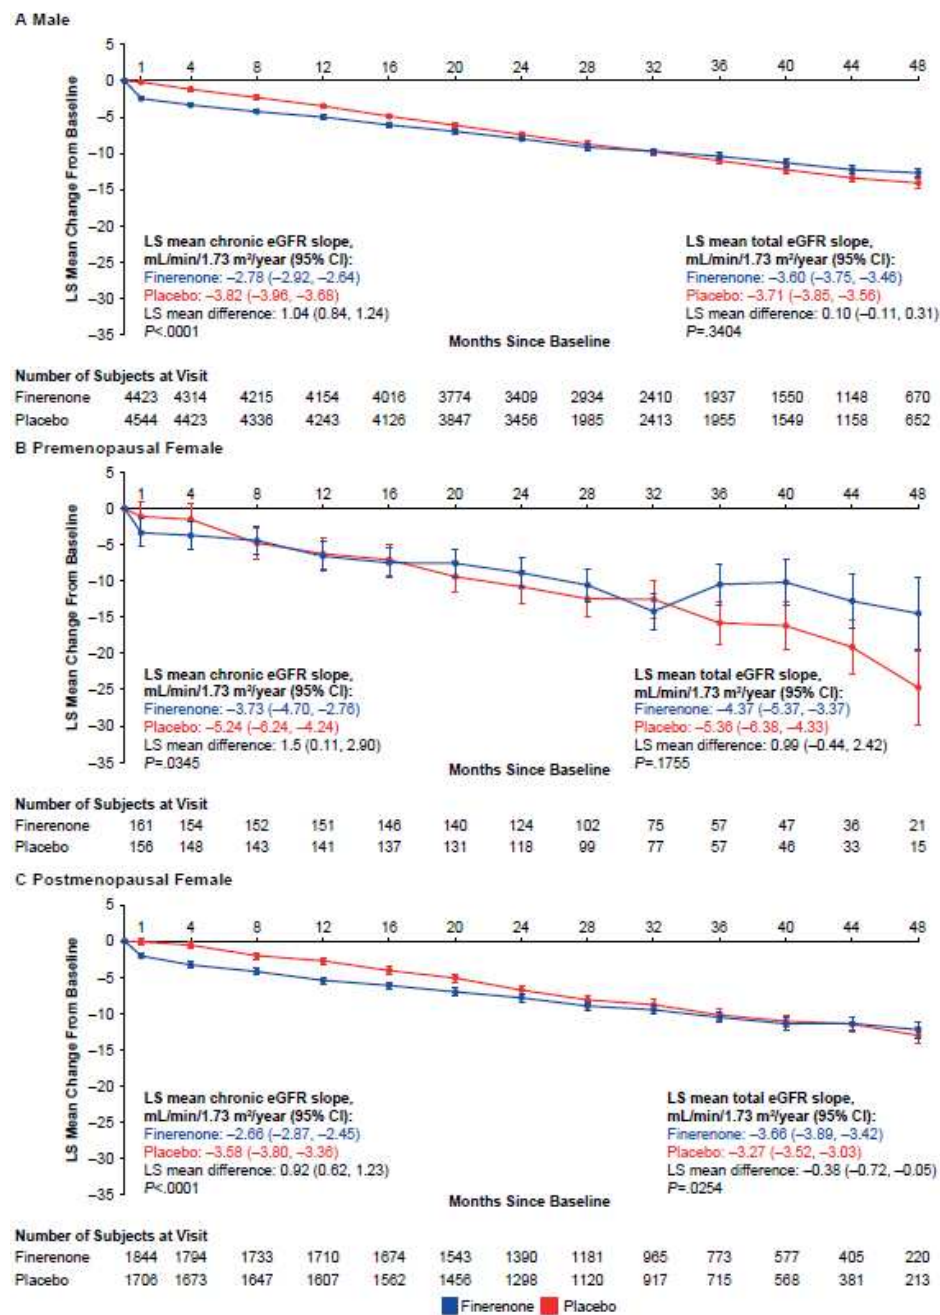

Chronic eGFR slope from month 4 to end-of-study visit.

CI = confidence interval; eGFR = estimated glomerular filtration rate; LS = least-squares.

**eFigure 5.** LS mean ratio to baseline UACR over time by age and sex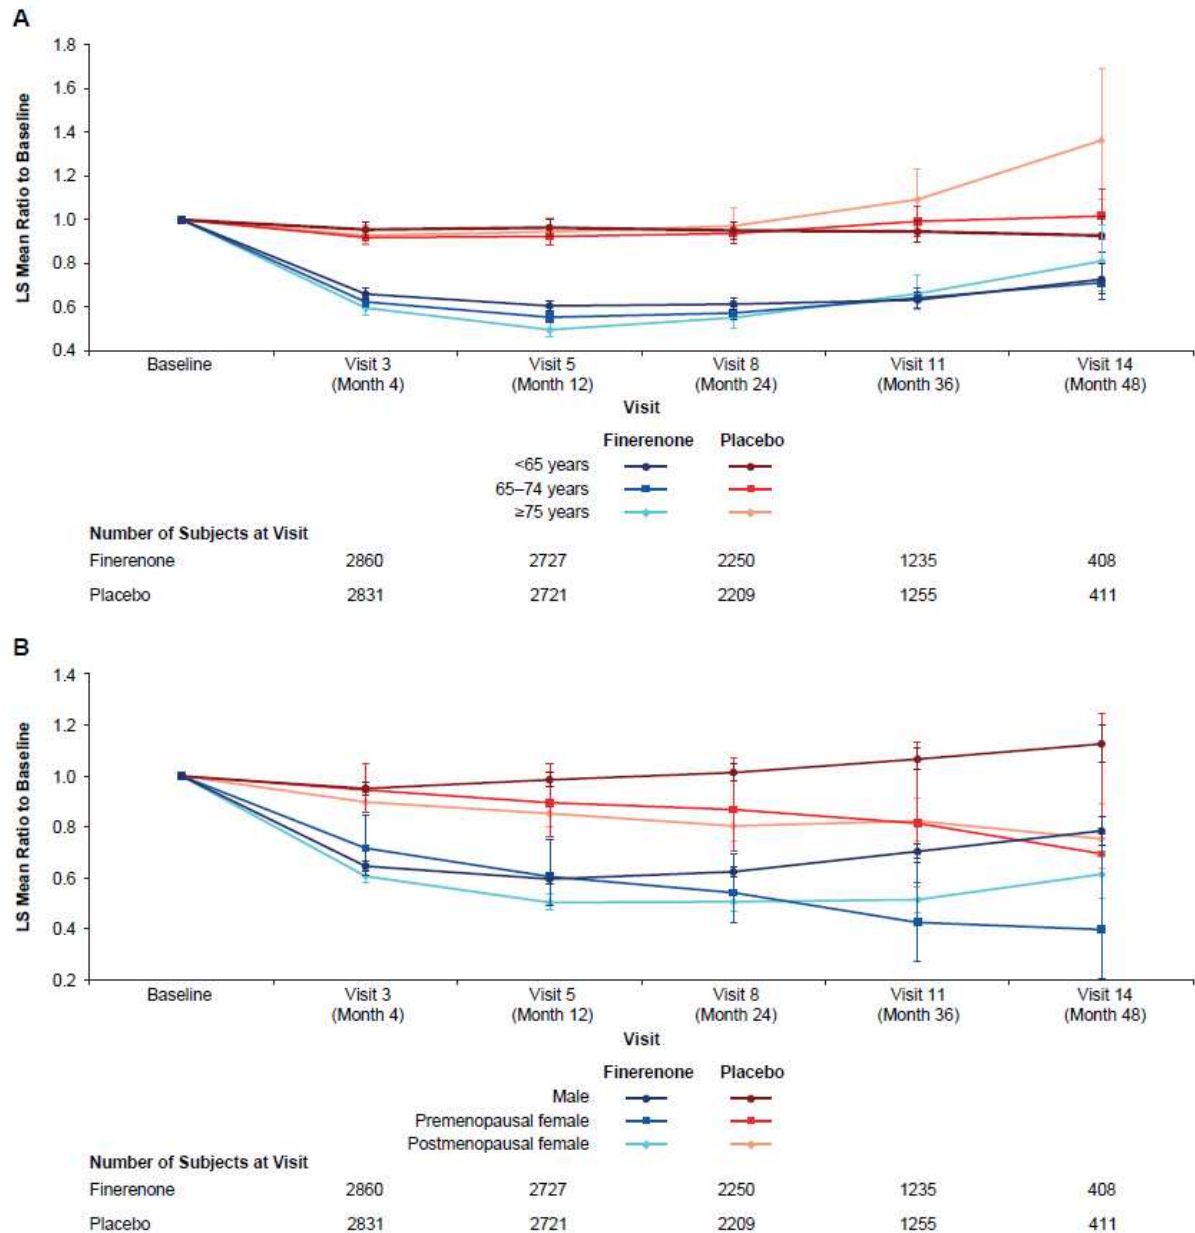

LS = least-squares; UACR = urine albumin-to-creatinine ratio.

**eFigure 6.** Relative risk of treatment-emergent hyperkalemia causing permanent discontinuation of study drug by age and sex

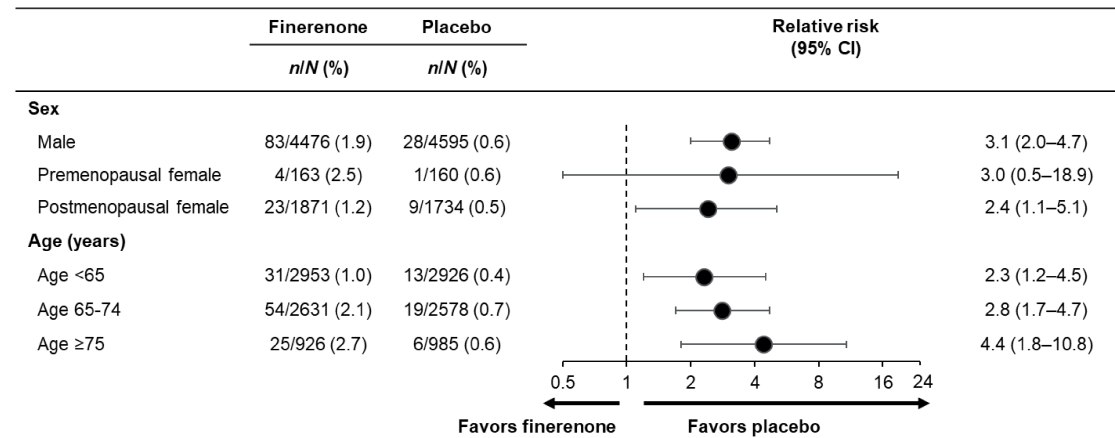

Relative risk values based on Mantel-Haenszel estimates (stratified by study). For the relative risk, a treatment-arm-size zero cell correction with zero term = 0.5 was applied.

**eFigure 7.** FIDELITY CONSORT diagram.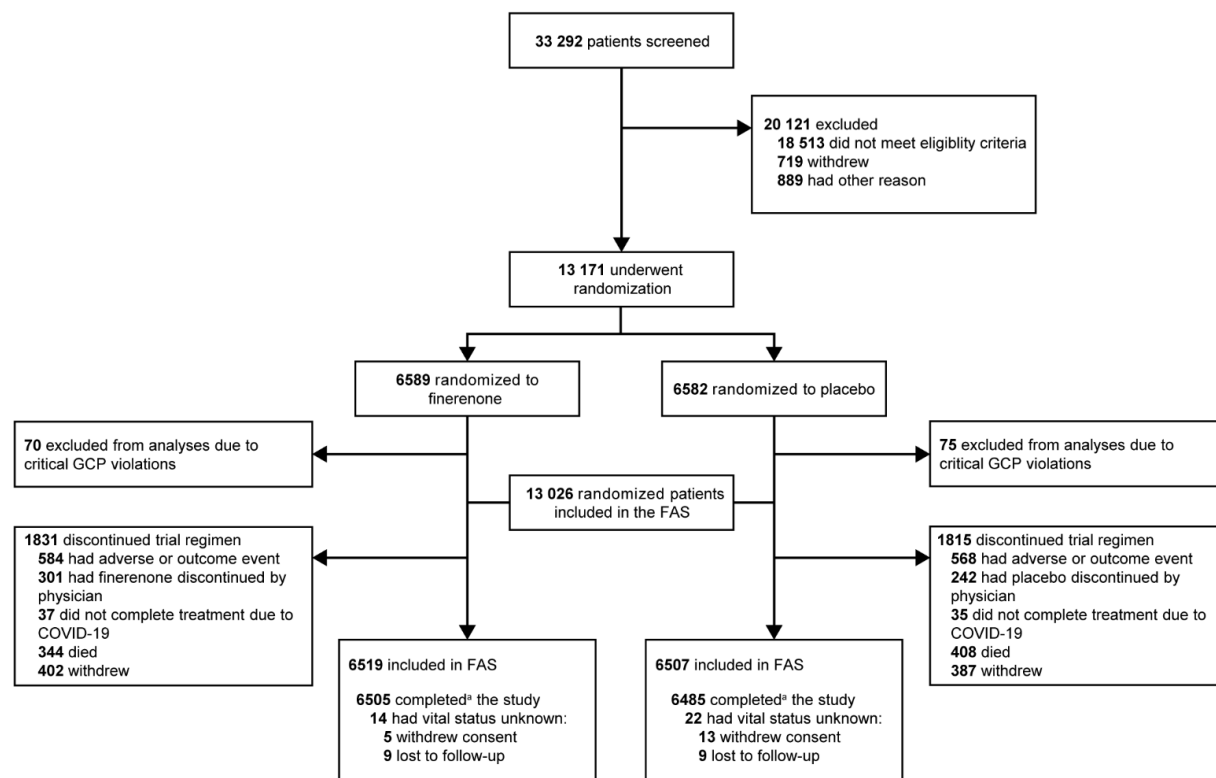

<sup>a</sup> The patient was considered as having completed the study if there was a contact with the patient after the end-of-study notification or if the patient died.

CONSORT = Consolidated Standards of Reporting Trials; COVID-19, coronavirus disease of 2019;

FAS, full analysis set; FIDELITY = The Finerenone in chronic kidney disease and type 2 diabetes:

Combined FIDELIO-DKD and FIGARO-DKD Trial programme analysis; GCP, Good Clinical Practice.
